# Supplementary material
Source: PubMed Central journal article supplement (PMC7733237)

# Synthesis and Anti-HIV Activity of Conformationally Restricted Bicyclic Hexahydroisobenzofuran Nucleoside Analogs

Alba Díaz-Rodríguez,<sup>a,b</sup> Yogesh S. Sanghvi,<sup>c</sup> Susana Fernández,<sup>a</sup> Raymond F. Schinazi,<sup>d</sup>  
Emmanuel A. Theodorakis,<sup>\*b</sup> Miguel Ferrero,<sup>a</sup> and Vicente Gotor<sup>\*a</sup>

<sup>a</sup> Departamento de Química Orgánica e Inorgánica and Instituto Universitario de Biotecnología de Asturias, Universidad de Oviedo, 33006-Oviedo (Asturias), Spain.

<sup>b</sup> Department of Chemistry and Biochemistry, University of California, San Diego, 9500 Gilman Drive, La Jolla, CA 92093-0358, USA.

<sup>c</sup> Rasayan Inc., 2802 Crystal Ridge Road, Encinitas, CA 92024-6615, USA.

<sup>d</sup> Emory University School of Medicine/Veterans Affairs Medical Center, Atlanta, Georgia 30033, USA.

vgs@uniovi.es or etheodor@ucsd.edu

## SUPPLEMENTARY MATERIAL (page 1 of 123 pages)

### Table of Contents

- General Spectroscopic and Experimental Data
- Copies of <sup>1</sup>H, <sup>13</sup>C, and <sup>19</sup>F (**20c** and **22c**) NMR Spectra of all compounds
- In addition, some 2D NMR experiments (**20c**, **20g**, **21g**, **22b**, **22d**, **22j**, **22m**, **22o**, and **23m**) are included

### General Spectroscopic and Experimental Data

**General techniques.** All reagents were bought from Aldrich and Acros at highest commercial quality and used without further purification except where noted. Air- and moisture-sensitive liquids and solutions were transferred via syringe or stainless steel cannula. Organic solutions were concentrated by rotary evaporation below 45 °C at approximately 20 mmHg. All non-aqueous reactions were carried out under anhydrous conditions using flame-dried glassware within an argon atmosphere in dry, freshly distilled solvents, unless otherwise noted. THF and CH<sub>2</sub>Cl<sub>2</sub> were purified by passage through a bed of activated alumina. Pyridine (Py) was distilled from CaH<sub>2</sub> prior to use. Yields refer to chromatographically and spectroscopically (<sup>1</sup>H NMR) homogeneous materials, unless otherwise stated. Reactions were monitored by TLC carried out on 0.25 mm E. Merck silica gel plates (60F-254) using UV light as visualizing agent and 7% ethanolic phosphomolybdic acid, or *p*-anisaldehyde solution and heat as developing agents. E. Merck silica gel (60, particle size 0.040-0.063 mm) was used for flash chromatography. LC-ESI-MS analyses were carried out in a chromatograph with UV detector at 280 nm using a VYDAC C-18 column, Cat. Number: 218TP54, (4.6mm x 250 nm); flow 1 mL/min; r.t.; gradient MeOH/H<sub>2</sub>O as eluent. NMR spectra were recorded on Varian Mercury 300, 400 and/or Unity 500 MHz or Bruker AV-400 or 600 MHz instruments and calibrated using residual undeuterated solvent as an internal reference. The following abbreviations were used to explain

the multiplicities: s= singlet; d= doublet, t= triplet, q= quartet, m= multiplet, br= broad. IR spectra were recorded on a Nicolet 320 Avatar FT-IR spectrometer and values are reported in  $\text{cm}^{-1}$  units. Optical rotations were recorded on a Jasco P-1010 polarimeter and values are reported as follows:  $[\alpha]_{\lambda}^T$  (c: g/100mL, solvent). High resolution mass spectra (HRMS) were recorded on a VG 7070 HS mass spectrometer under electron spray ionization (ESI) conditions. X-ray data were recorded on a Bruker SMART APEX 3kW Sealed Tube X-ray diffraction system.

The bicyclic motif of the synthetic hexahydroisobenzofuran nucleosides is abbreviated below as HIBF. The assignment of the NMR data is based on the nucleoside numbering (1'- 5') and the second ring as 6'- 9' positions (Figure 2 of the article).

**Synthesis of Lactone 12.** It was obtained following a previously described procedure [a] T. P. Brady, S. H. Kim, K. Wen, E. A. Theodorakis, *Angew. Chem. Int. Ed.* **2004**, *43*, 739-742. b) T. P. Brady, S. H. Kim, K. Wen, C. Kim, E. A. Theodorakis, *Chemistry Eur. J.* **2005**, *11*, 7175-7190].  $R_f$  (33% hexane/EtOAc): 0.41;  $[\alpha]_{\text{D}}^{20} = 19.4$  (c 3.40,  $\text{CH}_2\text{Cl}_2$ );  $\text{IR}$  (film):  $\nu$  3070, 3043, 2932, 2857, 1775, 1112, 704  $\text{cm}^{-1}$ ;  $^1\text{H NMR}$  ( $\text{CDCl}_3$ , 400 MHz):  $\delta$  1.08 (s, 9H,  $^t\text{Bu}$ ), 1.90-2.25 (m, 4H,  $\text{H}_6 + \text{H}_9$ ), 2.61 (m, 1H,  $\text{H}_3$ ), 3.01 (m, 1H,  $\text{H}_2$ ), 3.80 (m, 2H,  $\text{H}_5$ ), 4.16 (m, 1H,  $\text{H}_4$ ), 5.82 (m, 2H,  $\text{H}_7 + \text{H}_8$ ), 7.43 (m, 6H,  $\text{H}_o + \text{H}_p$ ), 7.69 (m, 4H,  $\text{H}_m$ );  $^{13}\text{C NMR}$  ( $\text{CDCl}_3$ , 100.6 MHz):  $\delta$  19.5 ( $\text{C}^t\text{Bu}$ ), 22.8, 25.8 ( $\text{C}_6 + \text{C}_9$ ), 27.1 ( $\text{Me}^t\text{Bu}$ ), 34.3 ( $\text{C}_3$ ), 37.7 ( $\text{C}_2$ ), 64.5 ( $\text{C}_5$ ), 85.2 ( $\text{C}_4$ ), 125.9-135.9 ( $\text{C}_7 + \text{C}_8 + \text{C}_m + \text{C}_o + \text{C}_p$ ), 179.8 ( $\text{C}=\text{O}$ );  $\text{MS}$  ( $\text{ESI}^+$ ,  $m/z$ ): 407  $[(\text{M}+\text{H})^+]$ , 100%; Exact mass found for  $\text{C}_{25}\text{H}_{30}\text{O}_3\text{Si}$ : 406.1964.

**Synthesis of Lactol 13.** A solution of **12** (12.8 g, 31.5 mmol) in dry  $\text{CH}_2\text{Cl}_2$  (150 mL) was cooled to  $-78^\circ\text{C}$  under argon and treated with DIBAL-H (35 mL, 35 mmol, 1M in  $\text{CH}_2\text{Cl}_2$ ) for 1 h. The reaction was quenched with MeOH (10 mL) and the solution was brought to r.t. over a 20 min period. Saturated Rochelle salt was added (stirred for 15 min) and the crude was extracted with EtOAc (4 x 100mL). Lactol **13** was isolated in 92% yield as yellow oil.  $R_f$  (33% hexane/EtOAc): 0.29;  $[\alpha]_{\text{D}}^{20} = -16.9$  (c 1.9,  $\text{CH}_2\text{Cl}_2$ );  $^1\text{H NMR}$  ( $\text{CDCl}_3$ , 400 MHz):  $\delta$  1.05 (s, 9H,  $^t\text{Bu}$ ), 1.72-1.85 (m, 2H,  $\text{H}_6 + \text{H}_9$ ), 2.18-2.25 (m, 3H,  $\text{H}_6 + \text{H}_9 + \text{H}_3$ ), 2.78 (m, 1H,  $\text{H}_2$ ), 3.08 (m, 1H, OH), 3.62 (m, 1H,  $\text{H}_5$ ), 3.83 (m, 2H,  $\text{H}_4 + \text{H}_5$ ), 5.10 (m, 1H,  $\text{H}_1$ ), 5.65 (m, 2H,  $\text{H}_7 + \text{H}_8$ ), 7.42 (m, 6H,  $\text{H}_o + \text{H}_p$ ), 7.70 (m, 4H,  $\text{H}_m$ );  $^{13}\text{C NMR}$  ( $\text{CDCl}_3$ , 100.6 MHz):  $\delta$  19.8 ( $\text{C}^t\text{Bu}$ ), 23.1, 23.5 ( $\text{C}_6 + \text{C}_9$ ), 27.1 ( $\text{Me}^t\text{Bu}$ ), 32.4 ( $\text{C}_2$ ), 41.9 ( $\text{C}_3$ ), 64.8 ( $\text{C}_5$ ), 83.6 ( $\text{C}_4$ ), 103.0 ( $\text{C}_1$ ), 124.3, 125.2 ( $\text{C}_7 + \text{C}_8$ ), 128.0, 130.0, 130.1, 135.9 ( $\text{C}_o + \text{C}_m + \text{C}_p$ );  $\text{MS}$  ( $\text{ESI}^+$ ,  $m/z$ ): 409  $[(\text{M}+\text{H})^+]$ , 100%; Exact mass found for  $\text{C}_{25}\text{H}_{32}\text{O}_3\text{Si}$ : 408.2120.

**Synthesis of Acetate 14.** Lactol **13** (6.65 mmol) was dissolved in Py (40 mL) and  $\text{Ac}_2\text{O}$  (1.8 mL, 19.95 mmol) was added dropwise. The reaction was stirred overnight and then quenched with saturated  $\text{NaHCO}_3$ . The solution was extracted with  $\text{CH}_2\text{Cl}_2$  (3 x 60 mL). The combined organic extracts were dried ( $\text{Na}_2\text{SO}_4$ ). The residue was purified by flash chromatography (10% hexane/EtOAc) to obtain **14** (90%).  $R_f$  (25% hexane/EtOAc): 0.65;  $[\alpha]_{\text{D}}^{20} = 22.8$  (c 0.6,  $\text{CHCl}_3$ );  $\text{IR}$  (film):  $\nu$  3069, 3025, 2925, 2849, 1744, 1421, 1226, 1099  $\text{cm}^{-1}$ ;  $^1\text{H NMR}$  ( $\text{CDCl}_3$ , 500 MHz):  $\delta$  1.06 (s, 9H,  $^t\text{Bu}$ ), 1.92 (m, 2H,  $\text{H}_6$ ,  $\text{H}_9$ ), 1.97 (m, 3H,  $\text{CH}_3$ ), 2.26 (m, 3H,  $\text{H}_3$ ,  $\text{H}_6$ ,  $\text{H}_9$ ), 2.66 (m, 1H,  $\text{H}_2$ ), 3.73 (dd, 1H,  $\text{H}_5$ ,  $^2J$  11.5 Hz,  $^3J$  4.5 Hz), 3.84 (dd, 1H,  $\text{H}_5$ ,  $^2J$  11.5 Hz,  $^3J$  4.0 Hz), 3.90 (dt, 1H,  $\text{H}_4$ ,  $^3J$  10.0, 4.0 Hz), 5.71 (m, 2H,  $\text{H}_7 + \text{H}_8$ ), 5.97 (s, 1H,  $\text{H}_1$ ), 7.41 (m, 6H,  $\text{H}_o + \text{H}_p$ ), 7.71 (m, 4H,  $\text{H}_m$ );  $^{13}\text{C NMR}$  ( $\text{CDCl}_3$ , 75.5 MHz):  $\delta$  19.5 ( $\text{C}^t\text{Bu}$ ), 21.7 (Me), 22.6, 23.0 ( $\text{C}_6 + \text{C}_9$ ), 26.9 (3 $\text{CH}_3$ -  $^t\text{Bu}$ ), 33.5 ( $\text{C}_3$ ), 40.2 ( $\text{C}_2$ ), 65.3 ( $\text{C}_5$ ), 84.5 ( $\text{C}_4$ ), 102.5 ( $\text{C}_1$ ), 124.5, 124.7 ( $\text{C}_7 + \text{C}_8$ ), 127.9, 130.0, 133.7, 135.2, 135.9 ( $\text{C}_{\text{arom}}$ ), 171.2 ( $\text{C}=\text{O}$ );  $\text{MS}$  ( $\text{ESI}^+$ ,  $m/z$ ): 468  $[(\text{M}+\text{NH}_4)^+]$ , 100%, 473  $[(\text{M}+\text{Na})^+]$ , 45, and 489  $[(\text{M}+\text{K})^+]$ , 15.

**Synthesis of Acetate 15.** Compound **14** (3.34 mmol) was dissolved in 60 mL of dry THF and then treated with TBAF (4.3 mL, 4.3 mmol, 1M in THF). The reaction was kept under argon at r.t. for 30 min. The solution was extracted with EtOAc (3 x 30 mL). The combined organic extracts were dried using  $\text{Na}_2\text{SO}_4$  and then filtered. The residue was purified by flash

chromatography (30% hexane/EtOAc) to give **15** (89%).  $R_f$  (EtOAc): 0.74;  $[\alpha]_D^{20} = 47.4$  (c 0.9, CHCl<sub>3</sub>); IR (film):  $\nu$  3019, 2922, 2845, 1728, 1427, 1369, 1233, 932 cm<sup>-1</sup>; <sup>1</sup>H NMR (CDCl<sub>3</sub>, 400 MHz):  $\delta$  1.85-1.92 (m, 2H, H<sub>6</sub>, H<sub>9</sub>), 2.04 (m, 3H, CH<sub>3</sub>), 2.24 (m, 1H, H<sub>3</sub>), 2.33 (m, 2H, H<sub>6</sub>, H<sub>9</sub>), 2.62 (m, 1H, H<sub>2</sub>), 3.56 (dd, 1H, H<sub>5</sub>, <sup>2</sup>J 12.0 Hz, <sup>3</sup>J 3.2 Hz), 3.83 (dd, 1H, H<sub>5</sub>, <sup>2</sup>J 12.0 Hz, <sup>3</sup>J 2.0 Hz), 3.90 (ddd, 1H, H<sub>4</sub>, <sup>3</sup>J 10.0, 3.2, 2.0 Hz), 5.70 (m, 2H, H<sub>7</sub>+H<sub>8</sub>), 5.95 (s, 1H, H<sub>1</sub>); <sup>13</sup>C NMR (CDCl<sub>3</sub>, 100.6 MHz):  $\delta$  21.7 (Me), 22.4, 22.9 (C<sub>6</sub>+C<sub>9</sub>), 32.2 (C<sub>3</sub>), 40.4 (C<sub>2</sub>), 63.1 (C<sub>5</sub>), 84.9 (C<sub>4</sub>), 102.7 (C<sub>1</sub>), 124.2, 124.7 (C<sub>7</sub>+C<sub>8</sub>), 170.5 (C=O); MS (ESI<sup>+</sup>,  $m/z$ ): 230 [(M+NH<sub>4</sub>)<sup>+</sup>, 50%], 235 [(M+Na)<sup>+</sup>, 75] and 251 [(M+K)<sup>+</sup>, 20].

**Synthesis of Diacetate 16.** A solution of **17** (31 mmol) in Py (100 mL) was treated with Ac<sub>2</sub>O (12 mL, 124 mmol). The reaction was stirred overnight and quenched with saturated NaHCO<sub>3</sub>. The solution was extracted with CH<sub>2</sub>Cl<sub>2</sub> (4 x 200 mL). The combined organic extracts were dried using Na<sub>2</sub>SO<sub>4</sub> and then filtered. The residue was purified by flash chromatography (15% hexane/EtOAc) to afford **16** (93%).  $R_f$  (50% EtOAc/hexane): 0.53;  $[\alpha]_D^{20} = -21.8$  (c 1.9, CHCl<sub>3</sub>); IR (film):  $\nu$  3030, 2918, 2838, 1737, 1641, 1440, 1239, 933 cm<sup>-1</sup>; <sup>1</sup>H NMR (CDCl<sub>3</sub>, 500 MHz):  $\delta$  1.87 (m, 2H, H<sub>6</sub>, H<sub>9</sub>), 2.04 (s, 3H, CH<sub>3</sub>), 2.09 (s, 3H, CH<sub>3</sub>), 2.12-2.46 (m, 4H, H<sub>2</sub>, H<sub>3</sub>, H<sub>6</sub>, H<sub>9</sub>), 4.01 (m, 1H, H<sub>5</sub>), 4.08 (m, 1H, H<sub>4</sub>), 4.30 (dd, 1H, H<sub>5</sub>, <sup>2</sup>J=11.5 Hz, <sup>3</sup>J=2.5 Hz), 5.68 (m, 2H, H<sub>7</sub>+H<sub>8</sub>), 5.96 (s, 1H, H<sub>1</sub>); <sup>13</sup>C NMR (CDCl<sub>3</sub>, 100.6 MHz):  $\delta$  21.1 (Me), 21.6 (Me), 22.4, 22.8 (C<sub>6</sub>+C<sub>9</sub>), 34.2 (C<sub>3</sub>), 40.0 (C<sub>2</sub>), 66.4 (C<sub>5</sub>), 81.7 (C<sub>4</sub>), 102.7 (C<sub>1</sub>), 124.0, 124.7 (C<sub>7</sub>+C<sub>8</sub>), 170.1, 170.2 (C=O); MS (ESI<sup>+</sup>,  $m/z$ ): 272 [(M+NH<sub>4</sub>)<sup>+</sup>, 20%] and 277 [(M+Na)<sup>+</sup>, 100].

**Synthesis of Diol 17.** Lactol **13** (31.5 mmol) was dissolved in THF (100 mL) under argon and then treated with TBAF (37.8 mL, 37.8 mmol, 1M in THF) at r.t. for 25 min. The solution was quenched with Brine and extracted with EtOAc (3 x 100mL). The residue was chromatographed using a gradient 30-70% EtOAc/hexane to give **17** (96%).  $R_f$  (EtOAc): 0.44;  $[\alpha]_D^{20} = -16.9$  (c 1.9, CH<sub>2</sub>Cl<sub>2</sub>); <sup>1</sup>H NMR (CDCl<sub>3</sub>, 100.6 MHz):  $\delta$  1.80 (m, 2H, H<sub>6</sub>+H<sub>9</sub>), 2.08-2.35 (m, 3H, H<sub>6</sub>+H<sub>9</sub>+H<sub>3</sub>), 2.65 (m, 1H, H<sub>2</sub>), 3.51 (m, 2H, H<sub>4</sub>+OH), 3.83 (d, 1H, H<sub>5</sub>, <sup>2</sup>J 13.2 Hz), 3.87 (d, 1H, H<sub>5</sub>, <sup>2</sup>J 13.2 Hz), 4.83 (br s, 1H, OH), 5.12 (s, 1H, H<sub>1</sub>), 5.65 (m, 2H, H<sub>7</sub>+H<sub>8</sub>); <sup>13</sup>C NMR (CDCl<sub>3</sub>, 75.5 MHz):  $\delta$  22.9, 23.5 (C<sub>6</sub>+C<sub>9</sub>), 31.9 (C<sub>3</sub>), 41.5 (C<sub>2</sub>), 62.6 (C<sub>5</sub>), 84.0 (C<sub>4</sub>), 103.0 (C<sub>1</sub>), 124.3, 125.2 (C<sub>7</sub>+C<sub>8</sub>); MS (ESI<sup>+</sup>,  $m/z$ ): 193 [(M+Na)<sup>+</sup>, 55%].

**Synthesis of Diacetate 19.** A solution of **13** (31.5 mmol) in THF (100mL) was treated with TBAOH (47.3 mmol, 33% in H<sub>2</sub>O) at r.t. for 6 h. Then, solvents were removed in vacuo. The orange residue was treated in Py (100 mL) with Ac<sub>2</sub>O (12 mL, 124 mmol). The reaction was stirred overnight and then quenched with saturated NaHCO<sub>3</sub>. The solution was extracted with CH<sub>2</sub>Cl<sub>2</sub> (4 x 200 mL). The combined organic extracts were dried using Na<sub>2</sub>SO<sub>4</sub>, and then filtered. The residue was purified by flash chromatography (20% hexane/EtOAc) to give **19** (70%).  $R_f$  (50% EtOAc/hexane): 0.55; IR (film):  $\nu$  3026, 2931, 2839, 1734, 1633, 1233, 936 cm<sup>-1</sup>; <sup>1</sup>H NMR (CDCl<sub>3</sub>, 400 MHz):  $\delta$  1.60-2.11 (m, 12H, 2CH<sub>3</sub>, 2H<sub>6</sub>, 2H<sub>9</sub>, H<sub>2</sub>, H<sub>3</sub>), 3.68 (d, 1H, H<sub>5</sub>, <sup>2</sup>J 13.0 Hz), 3.97 (dd, 1H, H<sub>5</sub>, <sup>2</sup>J 13.0 Hz, <sup>3</sup>J 1.2 Hz), 4.68 (s, 1H, H<sub>4</sub>), 5.28 (d, 1H, H<sub>1</sub>, <sup>3</sup>J 8.8 Hz), 5.54 (m, 2H, H<sub>7</sub>+H<sub>8</sub>); <sup>13</sup>C NMR (CDCl<sub>3</sub>, 100.6 MHz):  $\delta$  20.8 (Me), 20.9 (Me), 25.8, 26.0 (C<sub>6</sub>+C<sub>9</sub>), 34.9 (C<sub>3</sub>), 37.0 (C<sub>2</sub>), 68.1 (C<sub>5</sub>), 68.3 (C<sub>4</sub>), 97.0 (C<sub>1</sub>), 124.5, 125.6 (C<sub>7</sub>+C<sub>8</sub>), 169.5, 170.6 (C=O); MS (ESI<sup>+</sup>,  $m/z$ ): 272 [(M+NH<sub>4</sub>)<sup>+</sup>, 80%] and 277 [(M+Na)<sup>+</sup>, 100].

**General procedure for condensation of diacetate 16 with heterocyclic bases.** To a stirred solution of the different bases (1.81 mmol) in dry MeCN (5.0 mL), BSA was added (1.5 mL, 6.338 mmol). The reaction mixture was heated at 70 °C for 1.5 h. To the resulting clear mixture was added at r.t. a solution of diacetate **16** (0.9 mmol) in dry MeCN (3 mL), followed by DBU (0.434 mL, 2.899 mmol). This solution was cooled to 0 °C and then TMSOTf was added dropwise (1.05 mL, 5.798 mmol). The resulting mixtures were stirred for 2-3 h. Each mixture was poured into an ice-cool saturated NaHCO<sub>3</sub> solution and extracted with CH<sub>2</sub>Cl<sub>2</sub> (3 x 25 mL). Residues were purified by silica gel column chromatography to give **20** and **21** using a gradient 33-100% EtOAc/hexane.

**HIBF- $\alpha$ / $\beta$ -Uracil (20a+21a).**  $R_f$  (EtOAc): 0.55;  $[\alpha]_D^{20} = -23.4$  (c 0.7, CHCl<sub>3</sub>); **IR** (KBr):  $\nu$  3200, 3032, 2922, 2844, 1743, 1686, 1461, 1271, 1237, 1042, 705 cm<sup>-1</sup>; **<sup>1</sup>H NMR** (CDCl<sub>3</sub>, 500 MHz):  $\delta$  2.00 (m, 2H), 2.12 (s, 3H, CH<sub>3</sub>), 2.18 (s, 3H, CH<sub>3</sub>), 2.20-2.58 (m, 8H), 2.83 (m, 1H, H<sub>2</sub>), 4.05-4.45 (m, 6H, H<sub>4</sub>+H<sub>5</sub>), 5.68 (d, 1H, H<sub>1</sub>, <sup>3</sup>J 2.0 Hz), 5.70-5.76 (m, 6H, 2H<sub>5</sub>+2H<sub>7</sub>+2H<sub>8</sub>), 5.89 (d, 1H, H<sub>1</sub>, <sup>3</sup>J 4.0 Hz), 7.82 (d, 1H, H<sub>6</sub>, <sup>3</sup>J 8.3 Hz), 7.64 (d, 1H, H<sub>6</sub>, <sup>3</sup>J 8.3 Hz), 8.45 (br s, 1H, NH), 8.55 (br s, 1H, NH); **<sup>13</sup>C NMR** (CDCl<sub>3</sub>, 75.5 MHz):  $\delta$  19.7 (C<sub>6</sub> or C<sub>9</sub>), 21.08 (Me), 21.12 (Me), 22.7, 22.9, 23.6 (C<sub>6</sub>+C<sub>9</sub>), 33.6 (C<sub>3</sub>), 36.3 (C<sub>3</sub>), 37.3 (C<sub>2</sub>), 41.6 (C<sub>2</sub>), 63.6 (C<sub>5</sub>), 64.8 (C<sub>5</sub>), 80.2 (C<sub>4</sub>), 82.4 (C<sub>4</sub>), 90.0 (C<sub>1</sub>), 91.6 (C<sub>1</sub>), 101.1 (C<sub>5</sub>), 101.4 (C<sub>5</sub>), 123.8, 124.4, 124.7, 125.0 (2C<sub>7</sub>+2C<sub>8</sub>), 140.0 (C<sub>6</sub>), 140.4 (C<sub>6</sub>), 150.6 (C<sub>2</sub>), 150.9 (C<sub>2</sub>), 164.2 (C<sub>4</sub>), 164.5 (C<sub>4</sub>), 170.7 (C=O), 171.1 (C=O); **MS** (ESI<sup>+</sup>,  $m/z$ ): 307 [(M+H)<sup>+</sup>, 70%], 324 [(M+NH<sub>4</sub>)<sup>+</sup>, 80], and 329 [(M+Na)<sup>+</sup>, 100]; LC-ESI-MS (UV 280 nm): Coupling Ratio  $\beta/\alpha$  1.1:1  $t_R$ (min)= 17.46, 17.91; Exact mass found for C<sub>15</sub>H<sub>18</sub>N<sub>2</sub>O<sub>5</sub>: 306.1206.

**HIBF- $\alpha$ / $\beta$ -Thymine (20b+21b).**  $R_f$  (50% Hexane/EtOAc): 0.22;  $[\alpha]_D^{20} = -41.26$  (c 1.0, CHCl<sub>3</sub>); **IR** (KBr):  $\nu$  3197, 3032, 2926, 1744, 1684, 1662, 1473, 1271, 1237, 1044 cm<sup>-1</sup>; **<sup>1</sup>H NMR** (CDCl<sub>3</sub>, 400 MHz):  $\delta$  1.67 (m, 2H), 2.00 (m, 6H, CH<sub>3</sub>), 2.14-2.60 (m, 15H, 2CH<sub>3</sub>, H<sub>2</sub>, 2H<sub>3</sub>, 6(H<sub>6</sub>+H<sub>9</sub>)), 2.85 (m, 1H, H<sub>2</sub>), 4.11 (m, 3H, H<sub>4</sub>+2H<sub>5</sub>), 4.31 (m, 1H, H<sub>5</sub>), 4.39 (m, 1H, H<sub>5</sub>), 4.39 (ddd, 1H, H<sub>4</sub>, <sup>2</sup>J 11.5 Hz, <sup>3</sup>J 3.0, 2.5 Hz), 5.68 (m, 5H, H<sub>1</sub>+2H<sub>7</sub>+2H<sub>8</sub>), 5.89 (m, 1H, H<sub>1</sub>), 7.46 (q, 1H, <sup>4</sup>J 1.6 Hz), 7.56 (q, 1H, <sup>4</sup>J 0.8 Hz), 9.08 (brs, 1H, NH), 9.20 (brs, 1H, NH); **<sup>13</sup>C NMR** (CDCl<sub>3</sub>, 100.6 MHz):  $\delta$  12.9, 13.0 (Me), 19.8 (CH<sub>2</sub>), 21.1, 21.2 (Me), 22.9 (CH<sub>2</sub>), 23.1 (CH<sub>2</sub>), 23.6 (CH<sub>2</sub>), 34.2 (C<sub>3</sub>), 36.3 (C<sub>3</sub>), 37.3 (C<sub>2</sub>), 41.6 (C<sub>2</sub>), 64.0 (C<sub>5</sub>), 64.8 (C<sub>5</sub>), 80.1 (C<sub>4</sub>), 82.4 (C<sub>4</sub>), 89.9 (C<sub>1</sub>), 91.1 (C<sub>1</sub>), 109.5 (C<sub>5</sub>), 110.0 (C<sub>5</sub>), 123.9, 124.4, 124.6, 125.0 (2C<sub>7</sub>+2C<sub>8</sub>), 135.7 (C<sub>6</sub>), 136.1 (C<sub>6</sub>), 150.6 (C<sub>2</sub>), 150.9 (C<sub>2</sub>), 164.4 (C<sub>4</sub>), 164.5 (C<sub>4</sub>), 170.8 (C=O), 171.1 (C=O); **MS** (ESI<sup>+</sup>,  $m/z$ ): 321 [(M+H)<sup>+</sup>, 100%], 338 [(M+NH<sub>4</sub>)<sup>+</sup>, 90], and 343 [(M+Na)<sup>+</sup>, 95]; LC-ESI-MS (UV 280 nm): Coupling Ratio  $\beta/\alpha$  1.2:1  $t_R$ (min)= 19.11, 19.29; Exact mass found for C<sub>16</sub>H<sub>20</sub>N<sub>2</sub>O<sub>5</sub>: 320.1371.

**HIBF- $\beta$ -5-Fluorouracil (20c).**  $R_f$  (50% Hexane/EtOAc): 0.29;  $[\alpha]_D^{20} = +10.0$  (c 1.3, CHCl<sub>3</sub>); **IR** (KBr):  $\nu$  3189, 3075, 3044, 2950, 2857, 1718, 1661, 1469, 1262, 1230, 1093, 1064 cm<sup>-1</sup>; **<sup>1</sup>H NMR** (CDCl<sub>3</sub>, 500 MHz):  $\delta$  1.97-2.54 (m, 9H, H<sub>2</sub>+H<sub>3</sub>+ 2H<sub>6</sub>+2H<sub>9</sub>+CH<sub>3</sub>), 4.10 (m, 1H, H<sub>4</sub>), 4.36 (dd, 1H, H<sub>5</sub>, <sup>2</sup>J 13.3 Hz, <sup>3</sup>J 2.0 Hz), 4.48 (dd, 1H, H<sub>5</sub>, <sup>2</sup>J 13.3 Hz, <sup>3</sup>J 3.5 Hz), 5.61 (s, 1H, H<sub>1</sub>), 5.72 (m, 2H, H<sub>7</sub>+H<sub>8</sub>), 8.14 (d, 1H, H<sub>6</sub>, <sup>3</sup>J 6.5 Hz), 8.52 (br s, 1H, NH); **<sup>13</sup>C NMR** (CDCl<sub>3</sub>, 100.6 MHz):  $\delta$  20.9 (Me), 22.3, 23.6 (C<sub>6</sub>+C<sub>9</sub>), 32.7 (C<sub>3</sub>), 41.8 (C<sub>2</sub>), 62.6 (C<sub>5</sub>), 82.2 (C<sub>4</sub>), 91.5 (C<sub>1</sub>), 124.3, 124.5, 124.8 (C<sub>7</sub>+C<sub>8</sub>+C<sub>6</sub>), 140.2 (d, C<sub>5</sub>, <sup>1</sup>J<sub>C,F</sub> 234 Hz), 149.3 (C<sub>2</sub>), 157.5 (d, C<sub>4</sub>, <sup>2</sup>J<sub>C,F</sub> 26 Hz), 170.7 (C=O); **<sup>19</sup>F NMR** (CDCl<sub>3</sub>, 282 MHz):  $\delta$  167.1; **MS** (ESI<sup>+</sup>,  $m/z$ ): 325 [(M+H)<sup>+</sup>, 30%], 342 [(M+NH<sub>4</sub>)<sup>+</sup>, 60], and 347 [(M+Na)<sup>+</sup>, 100]; LC-ESI-MS (UV 280 nm):  $t_R$ (min)= 19.31; Exact mass found for C<sub>15</sub>H<sub>17</sub>FN<sub>2</sub>O<sub>5</sub>: 324.1122.

**HIBF- $\beta$ -5-Bromovinyluracil (20d).**  $R_f$  (50% Hexane/EtOAc): 0.41;  $[\alpha]_D^{20} = -22.3$  (c 0.6, CHCl<sub>3</sub>); **IR** (KBr):  $\nu$  3424, 2926, 2874, 1793, 1747, 1700, 1472, 1368, 1280, 1166, 1109, 1041 cm<sup>-1</sup>; **<sup>1</sup>H NMR** (CDCl<sub>3</sub>, 400 MHz):  $\delta$  2.05 (m, 2H, H<sub>6</sub>+H<sub>9</sub>), 2.16 (s, 3H, CH<sub>3</sub>), 2.18-2.58 (m, 4H, H<sub>6</sub>, H<sub>9</sub>, H<sub>3</sub>, H<sub>2</sub>), 4.14 (m, 1H, H<sub>4</sub>), 4.29 (dd, 1H, H<sub>5</sub>, <sup>2</sup>J 12.8 Hz, <sup>3</sup>J 2.0 Hz), 4.58 (dd, 1H, H<sub>5</sub>, <sup>2</sup>J 12.8 Hz, <sup>3</sup>J 4.8 Hz), 5.64 (s, 1H, H<sub>1</sub>), 5.73 (m, 2H, H<sub>7</sub>+H<sub>8</sub>), 6.73 (d, 1H, H<sub>7</sub>, <sup>3</sup>J 13.6 Hz), 7.40 (d, 1H, H<sub>8</sub>, <sup>3</sup>J 13.6 Hz), 7.85 (s, 1H, H<sub>6</sub>), 9.49 (br s, 1H, NH); **<sup>13</sup>C NMR** (CDCl<sub>3</sub>, 100.6 MHz):  $\delta$  21.0 (CH<sub>3</sub>), 22.3 (CH<sub>2</sub>), 23.4 (CH<sub>2</sub>), 33.1 (C<sub>3</sub>), 41.4 (C<sub>2</sub>), 63.2 (C<sub>5</sub>), 82.5 (C<sub>4</sub>), 91.7 (C<sub>1</sub>), 109.7 (C<sub>5</sub>), 110.2 (C<sub>8</sub>), 124.1, 124.4, (C<sub>7</sub>+C<sub>8</sub>), 128.5 (C<sub>7</sub>), 137.7 (C<sub>6</sub>), 149.3 (C<sub>2</sub>), 161.8 (C<sub>4</sub>), 170.6 (C=O); **MS** (ESI<sup>+</sup>,  $m/z$ ): 433 [(M<sup>79</sup>Br+Na)<sup>+</sup>, 100%], 435 [(M<sup>81</sup>Br+Na)<sup>+</sup>, 97]; Exact mass found for C<sub>17</sub>H<sub>19</sub>BrN<sub>2</sub>O<sub>5</sub>: 410.0872.

**HIBF- $\alpha$ / $\beta$ -Cytosine (20e+21e).**  $R_f$  (EtOAc): 0.24;  $[\alpha]_D^{20} = -25.8$  (c 0.4, MeOH); **<sup>1</sup>H NMR** (MeOH-*d*<sub>4</sub>, 400 MHz):  $\delta$  1.90-2.80 (m, 23H, 2H<sub>3</sub>+H<sub>2</sub>+ 4H<sub>6</sub>+ 4H<sub>9</sub>+ 4CH<sub>3</sub>), 3.00 (m, 1H, H<sub>2</sub>), 4.10-4.50 (m, 6H, 2H<sub>4</sub>+4H<sub>5</sub>), 5.60 (m, 4H, 2H<sub>7</sub>+2H<sub>8</sub>), 5.69 (s, 1H, H<sub>1</sub>), 5.99 (d, 1H, H<sub>1</sub>, <sup>3</sup>J 4.4 Hz), 7.48 (d, 1H, H<sub>5</sub>, <sup>3</sup>J 7.4 Hz), 7.54 (d, 1H, H<sub>5</sub>, <sup>3</sup>J 7.4 Hz), 8.04 (d, 1H, H<sub>6</sub>, <sup>3</sup>J 7.4 Hz),

8.30 (d, 1H, H<sub>6</sub>, <sup>3</sup>J 7.4 Hz), 9.78 (brs, 1H, NH), 9.86 (brs, 1H, NH); <sup>13</sup>C NMR (MeOH-*d*<sub>4</sub>, 100.6 MHz): δ 19.6 (C<sub>6'</sub> or C<sub>9'</sub>), 21.0 (Me), 21.1 (Me), 22.0, 22.8, 24.0 (C<sub>6'</sub>+C<sub>9'</sub>), 24.96 (Me), 24.97 (Me), 32.5 (C<sub>3'</sub>), 36.2 (C<sub>3'</sub>), 36.5 (C<sub>2'</sub>), 41.2 (C<sub>2'</sub>), 63.0 (C<sub>5'</sub>), 64.7 (C<sub>5'</sub>), 80.5 (C<sub>4'</sub>), 82.5 (C<sub>4'</sub>), 91.0 (C<sub>1'</sub>), 92.9 (C<sub>1'</sub>), 96.4 (C<sub>5</sub>), 96.7 (C<sub>5</sub>), 123.2, 123.9, 124.6, 124.7 (C<sub>7</sub>+C<sub>8</sub>), 144.5 (C<sub>6</sub>), 145.0 (C<sub>6</sub>), 156.40 (C<sub>2</sub>), 155.44 (C<sub>2</sub>), 162.9 (C<sub>4</sub>), 163.0 (C<sub>4</sub>), 170.6, 171.1, 171.3, 171.5 (C=O); MS (ESI<sup>+</sup>, *m/z*): 370 [(M+Na)<sup>+</sup>, 100%]; LC-ESI-MS (UV 280 nm): Coupling Ratio β/α 1.2:1 t<sub>R</sub>(min)= 19.09, 19.63; Exact mass found for C<sub>17</sub>H<sub>21</sub>N<sub>3</sub>O<sub>5</sub>: 347.1480.

**HIBF-α/β-6-Chloropurine (20f+21f).** R<sub>f</sub> (50% hexane/EtOAc): 0.37; [α]<sub>D</sub><sup>20</sup>= -25.8 (c 1.0, CHCl<sub>3</sub>); IR (KBr): ν 3389, 2942, 2890, 1708, 1633, 1489, 1245, 1193, 1094, 920 cm<sup>-1</sup>; <sup>1</sup>H NMR (CDCl<sub>3</sub>, 400 MHz): δ 1.95-2.99 (m, 18H, 2CH<sub>3</sub>+2H<sub>2</sub>+2H<sub>3</sub>+4H<sub>6</sub>+4H<sub>9</sub>), 4.10-4.35 (m, 6H, H<sub>4</sub>+H<sub>5</sub>), 5.54 (m, 2H, H<sub>7</sub>+H<sub>8</sub>), 5.70 (m, 2H, H<sub>7</sub>+H<sub>8</sub>), 5.95 (d, 1H, H<sub>1</sub>, <sup>3</sup>J 2.8 Hz), 6.30 (m, 1H, H<sub>1</sub>), 8.35 (s, 1H, H<sub>8</sub>), 8.48 (s, 1H, H<sub>8</sub>), 8.62 (s, 1H, H<sub>2</sub>), 8.64 (s, 1H, H<sub>2</sub>); <sup>13</sup>C NMR (CDCl<sub>3</sub>, 100.6 MHz): δ 19.8 (C<sub>6'</sub> or C<sub>9'</sub>), 21.1 (2Me), 22.7, 23.3, 23.7 (3C, C<sub>6'</sub>+C<sub>9'</sub>), 33.7 (C<sub>3'</sub>), 36.6 (C<sub>3'</sub>), 38.1 (C<sub>2'</sub>), 40.7 (C<sub>2'</sub>), 63.5 (C<sub>5'</sub>), 64.8 (C<sub>5'</sub>), 80.5 (C<sub>4'</sub>), 82.6 (C<sub>4'</sub>), 89.5 (C<sub>1'</sub>), 91.0 (C<sub>1'</sub>), 123.6, 124.1, 124.3, 124.6 (C<sub>7</sub>+C<sub>8</sub>), 132.2 (C<sub>5</sub>), 132.6 (C<sub>5</sub>), 143.5 (C<sub>8</sub>), 143.9 (C<sub>8</sub>), 151.0, 151.1, 151.8 (C<sub>2</sub>+C<sub>4</sub>), 151.9 (C<sub>6</sub>), 152.0 (C<sub>6</sub>), 170.8, 171.0 (C=O); MS (ESI<sup>+</sup>, *m/z*): 371 [(M<sup>35</sup>Cl+Na)<sup>+</sup>, 100], 373 [(M<sup>37</sup>Cl+Na)<sup>+</sup>, 30]; LC-ESI-MS (UV 280 nm): Coupling Ratio β/α 1.5:1 t<sub>R</sub>(min)= 21.19, 21.43; Exact mass found for C<sub>16</sub>H<sub>17</sub>ClN<sub>4</sub>O<sub>3</sub>: 348.0982.

**HIBF-α/β-2,6-Dichloropurine (20g+21g).** The two anomers were separated. **20g:** R<sub>f</sub> (50% hexane/EtOAc): 0.52; [α]<sub>D</sub><sup>20</sup>= -7.3 (c 0.3, CHCl<sub>3</sub>); IR (KBr): ν 3370, 2940, 2879, 1728, 1627, 1480, 1239, 1190, 1076, cm<sup>-1</sup>; <sup>1</sup>H NMR (CDCl<sub>3</sub>, 400 MHz): δ 2.05-2.13 (m, 5H, H<sub>6</sub>, H<sub>9</sub>, CH<sub>3</sub>), 2.40-2.63 (m, 3H, H<sub>3</sub>, H<sub>6</sub>, H<sub>9</sub>), 3.00 (m, 1H, H<sub>2</sub>), 4.21(dt, 1H, H<sub>4</sub>, <sup>3</sup>J 9.3, 3.4 Hz), 4.42 (m, 2H, H<sub>5</sub>), 5.78 (m, 2H, H<sub>7</sub>+H<sub>8</sub>), 5.97 (d, 1H, H<sub>1</sub>, <sup>3</sup>J 1.7 Hz), 8.55 (s, 1H, H<sub>8</sub>); <sup>13</sup>C NMR (CDCl<sub>3</sub>, 100.6 MHz): δ 20.9 (CH<sub>3</sub>), 22.4 (C<sub>9'</sub>), 23.5 (C<sub>6'</sub>), 33.5 (C<sub>3'</sub>), 40.7 (C<sub>2'</sub>), 63.1 (C<sub>5'</sub>), 82.5 (C<sub>4'</sub>), 91.0 (C<sub>1'</sub>), 123.9, 124.3 (C<sub>7</sub>+C<sub>8</sub>), 131.6 (C<sub>5</sub>), 144.4 (C<sub>8</sub>), 151.7 (C<sub>4</sub>), 152.0 (C<sub>2</sub>), 152.8 (C<sub>6</sub>), 170.5 (C=O); MS (ESI<sup>+</sup>, *m/z*): 405 [(M<sup>35</sup>Cl<sup>35</sup>Cl+Na)<sup>+</sup>, 100%], 407 [(M<sup>35</sup>Cl<sup>37</sup>Cl+Na)<sup>+</sup>, 80], and 409 [(M<sup>37</sup>Cl<sup>37</sup>Cl+Na)<sup>+</sup>, 10%]; LC-ESI-MS (UV 280 nm): Ratio β/α 2.4:1 t<sub>R</sub>(min)= 23.62, 24.27; Exact mass found for C<sub>16</sub>H<sub>16</sub>Cl<sub>2</sub>N<sub>4</sub>O<sub>3</sub>: 382.0600.

**21g:** R<sub>f</sub> (50% hexane/EtOAc): 0.52; [α]<sub>D</sub><sup>20</sup>= -40.8 (c 1.3, CHCl<sub>3</sub>); <sup>1</sup>H NMR (CDCl<sub>3</sub>, 400 MHz): δ 1.53 (m, 1H, H<sub>6</sub>), 1.56 (m, 1H, H<sub>6</sub>), 2.08 (m, 1H, H<sub>9</sub>), 2.15 (s, 3H, CH<sub>3</sub>), 2.46 (m, 1H, H<sub>9</sub>), 2.66 (m, 1H, H<sub>3</sub>), 3.02 (m, 1H, H<sub>2</sub>), 4.19 (dd, 1H, H<sub>5</sub>, <sup>3</sup>J 12.1, 5.3 Hz), 4.30 (m, 1H, H<sub>4</sub>), 4.42 (dd, 1H, H<sub>5</sub>, <sup>3</sup>J 12.1, 2.4 Hz), 5.65 (m, 2H, H<sub>7</sub>+H<sub>8</sub>), 6.33 (d, 1H, H<sub>1</sub>, <sup>3</sup>J 4.3 Hz), 8.39 (s, 1H, H<sub>8</sub>); <sup>13</sup>C NMR (CDCl<sub>3</sub>, 100.6 MHz): δ 19.6 (CH<sub>2</sub>), 20.9 (CH<sub>3</sub>), 23.1 (CH<sub>2</sub>), 36.4 (C<sub>3'</sub>), 37.9 (C<sub>2'</sub>), 64.4 (C<sub>5'</sub>), 80.5 (C<sub>4'</sub>), 89.3 (C<sub>1'</sub>), 123.3, 124.2 (C<sub>7</sub>+C<sub>8</sub>), 131.2 (C<sub>5</sub>), 144.0 (C<sub>8</sub>), 151.7 (C<sub>4</sub>), 151.9 (C<sub>2</sub>), 152.9 (C<sub>6</sub>), 170.8 (C=O); MS (ESI<sup>+</sup>, *m/z*): 405 [(M<sup>35</sup>Cl<sup>35</sup>Cl+Na)<sup>+</sup>, 100%], 407 [(M<sup>35</sup>Cl<sup>37</sup>Cl+Na)<sup>+</sup>, 80], and 409 [(M<sup>37</sup>Cl<sup>37</sup>Cl+Na)<sup>+</sup>, 10]; LC-ESI-MS (UV 280 nm): Coupling Ratio β/α 2.4:1 t<sub>R</sub>(min)= 23.62, 24.27; Exact mass found for C<sub>16</sub>H<sub>16</sub>Cl<sub>2</sub>N<sub>4</sub>O<sub>3</sub>: 382.0651.

**General protocols for deprotection of HIBF nucleoside derivatives 20-21. Method A** (deprotection of 5'-OAc group). Nucleoside derivatives **20a-f+21a-f** (0.1mmol) were dissolved in a 2M NH<sub>3</sub>/MeOH solution (1.5 mL) and stirred at r.t. overnight. Residues were purified by silica gel column chromatography using a gradient 33-100% EtOAc/hexane. **Method B.** Nucleoside derivatives **20f+21f, 20g** and **21g** (0.1mmol) were treated with a NH<sub>3</sub>/MeOH saturated solution (1.5 mL) and stirred at 110 °C in a Parr reactor for 36 h. Residues were purified by silica gel column chromatography (gradient 50-100% EtOAc/hexane) obtaining **22i, 23i** (95-97%), **22j-22m, 23j-23m** (quantitative combined yield). **Method C.** Nucleoside derivatives **20f** and **20g** (0.11 mmol) were treated with a 2M NH<sub>3</sub>/MeOH solution (1.8 mL) and stirred at 90-100 °C in a Parr reactor for 30 h. Residues were purified by silica gel column chromatography using a gradient 50-100% EtOAc/hexane.

**HIBF-β-Uracil (22a).** From **20a** using Method A. R<sub>f</sub> (EtOAc): 0.40; [α]<sub>D</sub><sup>20</sup>= +0.7 (c 0.3,

CHCl<sub>3</sub>); <sup>1</sup>H NMR (CDCl<sub>3</sub>, 500 MHz): δ 1.99 (m, 2H, H<sub>6'</sub>+H<sub>9'</sub>), 2.34 (m, 1H, H<sub>3'</sub>), 2.47 (m, 2H, H<sub>6'</sub>+H<sub>9'</sub>), 2.53 (m, 1H, H<sub>2'</sub>), 3.80 (dt, 1H, H<sub>5'</sub>, <sup>2</sup>J 12 Hz, <sup>3</sup>J 3.5 Hz), 3.96 (dt, 1H, H<sub>4'</sub>, <sup>3</sup>J 9.0 Hz, <sup>3</sup>J = 3.5 Hz), 4.07 (ddd, 1H, H<sub>5'</sub>, <sup>2</sup>J 12.0 Hz, <sup>3</sup>J 3.5 Hz, <sup>4</sup>J 2.5 Hz), 5.70 (m, 3H, H<sub>7'</sub>+H<sub>8'</sub>+H<sub>1'</sub>), 8.05 (d, 1H, H<sub>6'</sub>, <sup>3</sup>J 8.0 Hz), 8.36 (br s, 1H, NH); <sup>13</sup>C NMR (CDCl<sub>3</sub>, 100.6 MHz): δ 23.1 (C<sub>6'</sub>), 23.7 (C<sub>9'</sub>), 32.6 (C<sub>3'</sub>), 41.6 (C<sub>2'</sub>), 62.0 (C<sub>5'</sub>), 85.0 (C<sub>4'</sub>), 91.2 (C<sub>1'</sub>), 101.4 (C<sub>5</sub>), 124.7, 124.8 (C<sub>7'</sub>+C<sub>8'</sub>), 141.0 (C<sub>6</sub>), 150.5 (C<sub>2</sub>), 163.5 (C<sub>4</sub>); MS (ESI<sup>+</sup>, *m/z*): 287 [(M+Na)<sup>+</sup>, 100%]; Exact mass found for C<sub>13</sub>H<sub>15</sub>N<sub>2</sub>O<sub>4</sub>: 264.1104.

**HIBF-β-Thymine (22b).** From **20b** using Method A. R<sub>f</sub> (50% hexane/EtOAc): 0.16; [ $\alpha$ ]<sub>D</sub><sup>20</sup> = -13.6 (c 0.3, CHCl<sub>3</sub>); <sup>1</sup>H NMR (CDCl<sub>3</sub>, 500 MHz): δ 1.91 (d, 3H, Me, <sup>4</sup>J 1.0 Hz), 2.00 (m, 2H, H<sub>6'</sub>+H<sub>9'</sub>), 2.00 (m, 4H, H<sub>6'</sub>+H<sub>9'</sub>+H<sub>3'</sub>+H<sub>2'</sub>), 3.81 (dt, 1H, H<sub>5'</sub>, <sup>2</sup>J 12 Hz, <sup>3</sup>J 4.0 Hz), 3.94 (dt, 1H, H<sub>4'</sub>, <sup>3</sup>J 9.0 Hz, <sup>3</sup>J 4.0 Hz), 4.06 (ddd, 1H, H<sub>5'</sub>, <sup>3</sup>J 9.0 Hz, <sup>3</sup>J 4.0 Hz, <sup>4</sup>J 2.5 Hz), 5.73 (m, 3H, H<sub>7'</sub>, H<sub>8'</sub>, H<sub>1'</sub>), 7.79 (d, 1H, H<sub>6'</sub>, <sup>4</sup>J 1.0 Hz), 8.50 (brs, 1H, NH); <sup>13</sup>C NMR (CDCl<sub>3</sub>, 100.6 MHz): δ 12.9 (Me), 23.5, 23.7 (C<sub>6'</sub>+C<sub>9'</sub>), 33.2 (C<sub>3'</sub>), 41.5 (C<sub>2'</sub>), 62.5 (C<sub>5'</sub>), 85.0 (C<sub>4'</sub>), 91.0 (C<sub>1'</sub>), 110.1 (C<sub>5</sub>), 125.0, 125.1 (C<sub>7'</sub>+C<sub>8'</sub>), 136.8 (C<sub>6</sub>), 150.6 (C<sub>2</sub>), 163.9 (C<sub>4</sub>); MS (ESI<sup>+</sup>, *m/z*): 301 [(M+Na)<sup>+</sup>, 100%]; Exact mass found for C<sub>14</sub>H<sub>18</sub>N<sub>2</sub>O<sub>4</sub>: 278.1257.

**HIBF-β-5-Fluorouracil (22c).** From **20c** using Method A. R<sub>f</sub> (50% hexane/EtOAc): 0.28; [ $\alpha$ ]<sub>D</sub><sup>20</sup> = +28.6 (c 0.8, CHCl<sub>3</sub>); IR (KBr):  $\nu$  3508, 3448, 3156, 3040, 2925, 2851, 1682, 1652, 1266, 1093, 1066, 1026 cm<sup>-1</sup>; <sup>1</sup>H NMR (CDCl<sub>3</sub>, 500 MHz): δ 1.98 (m, 2H, H<sub>6'</sub>, H<sub>9'</sub>), 2.26-2.53 (m, 4H, H<sub>6'</sub>, H<sub>9'</sub>, H<sub>3'</sub>, H<sub>2'</sub>), 3.83 (dd, 1H, H<sub>5'</sub>, <sup>2</sup>J 12.5 Hz, <sup>3</sup>J 2.5 Hz), 3.95 (dt, 1H, H<sub>4'</sub>, <sup>3</sup>J 8.5 Hz, <sup>3</sup>J 2.5 Hz), 4.13 (dd, 1H, H<sub>5'</sub>, <sup>2</sup>J 12.5 Hz, <sup>3</sup>J 2.5 Hz), 5.68 (m, 1H, H<sub>1'</sub>), 5.78 (m, 2H, H<sub>7'</sub>+H<sub>8'</sub>), 8.42 (d, 1H, H<sub>6'</sub>, <sup>3</sup>J 7.0 Hz), 8.50 (br s, 1H, NH); <sup>13</sup>C NMR (CDCl<sub>3</sub>, 75.5 MHz): δ 22.9, 23.7 (C<sub>6'</sub>+C<sub>9'</sub>), 32.0 (C<sub>3'</sub>), 41.7 (C<sub>2'</sub>), 61.5 (C<sub>5'</sub>), 85.0 (C<sub>4'</sub>), 91.2 (C<sub>1'</sub>), 124.6, 124.7 (C<sub>7'</sub>+C<sub>8'</sub>), 125.8 (d, C<sub>6</sub>, <sup>2</sup>J<sub>C,F</sub> 139.8 Hz), 140.2 (d, C<sub>5</sub>, <sup>1</sup>J<sub>C,F</sub> 930 Hz), 149.1 (C<sub>2</sub>), 157.2 (d, C<sub>4</sub>, <sup>2</sup>J<sub>C,F</sub> 105.9 Hz); <sup>19</sup>F NMR (CDCl<sub>3</sub>, 282 MHz): δ 167.0; MS (ESI<sup>+</sup>, *m/z*): 305 [(M+Na)<sup>+</sup>, 100%]; Exact mass found for C<sub>13</sub>H<sub>15</sub>FN<sub>2</sub>O<sub>4</sub>: 282.1014.

**HIBF-β-5-Bromovinyluracil (22d).** From **20d** using Method A. R<sub>f</sub> (50% hexane/EtOAc): 0.32; [ $\alpha$ ]<sub>D</sub><sup>20</sup> = -24.8 (c 0.6, CHCl<sub>3</sub>); <sup>1</sup>H NMR (CDCl<sub>3</sub>, 500 MHz): δ 1.99 (m, 2H, H<sub>6'</sub>, H<sub>9'</sub>), 2.30-2.52 (m, 4H, H<sub>6'</sub>, H<sub>9'</sub>, H<sub>2'</sub>, H<sub>3'</sub>), 3.85 (d, 1H, H<sub>5'</sub>, <sup>2</sup>J 12.9 Hz), 3.99 (m, 1H, H<sub>4'</sub>), 4.17 (d, 1H, H<sub>5'</sub>, <sup>2</sup>J 12.9 Hz), 5.73 (m, 3H, H<sub>7'</sub>+H<sub>8'</sub>+H<sub>1'</sub>), 6.70 (d, 1H, H<sub>7'</sub>, <sup>3</sup>J 13.6 Hz), 7.32 (d, 1H, H<sub>8'</sub>, <sup>3</sup>J 13.6 Hz), 8.33 (s, 1H, H<sub>6'</sub>), 8.52 (br s, 1H, NH); <sup>13</sup>C NMR (CDCl<sub>3</sub>, 100.6 MHz): δ 22.5, 23.6 (C<sub>6'</sub>+C<sub>9'</sub>), 31.6 (C<sub>3'</sub>), 41.6 (C<sub>2'</sub>), 61.1 (C<sub>5'</sub>), 84.7 (C<sub>4'</sub>), 91.1 (C<sub>1'</sub>), 108.8 (C<sub>8</sub>), 110.1 (C<sub>5</sub>), 124.3, 124.4 (C<sub>7'</sub>+C<sub>8'</sub>), 128.6 (C<sub>7</sub>), 138.8 (C<sub>6</sub>), 149.2 (C<sub>2</sub>), 161.3 (C<sub>4</sub>); MS (ESI<sup>+</sup>, *m/z*): 369 [(M<sup>79</sup>Br+H)<sup>+</sup>, 100%] and 371 [(M<sup>81</sup>Br+H)<sup>+</sup>, 96]; Exact mass found for C<sub>15</sub>H<sub>17</sub>BrN<sub>2</sub>O<sub>4</sub>: 368.0395.

**HIBF-β-6-Chloropurine (22f).** From **20f** using Method A. R<sub>f</sub> (EtOAc): 0.50; [ $\alpha$ ]<sub>D</sub><sup>20</sup> = -37.2 (c 1.3, CHCl<sub>3</sub>); <sup>1</sup>H NMR (CDCl<sub>3</sub>, 600 MHz): δ 1.95, 2.11 (m, 2H, H<sub>6'</sub>+H<sub>9'</sub>), 2.43 (m, 2H, H<sub>6'</sub>+H<sub>9'</sub>), 2.75 (m, 1H, H<sub>3'</sub>), 3.26 (m, 1H, H<sub>2'</sub>), 3.82 (dd, 1H, H<sub>5'</sub>, <sup>2</sup>J 12.2 Hz, <sup>3</sup>J 4.8 Hz), 4.10 (m, 2H, H<sub>5'</sub>+H<sub>4'</sub>), 5.80 (m, 2H, H<sub>7'</sub>+H<sub>8'</sub>), 5.94 (d, 1H, H<sub>1'</sub>, <sup>3</sup>J 6.0 Hz), 8.46 (s, 1H, H<sub>8</sub>), 8.78 (s, 1H, H<sub>2</sub>); <sup>13</sup>C NMR (CDCl<sub>3</sub>, 150.9 MHz): δ 22.8, 24.7 (C<sub>6'</sub>+C<sub>9'</sub>), 34.0 (C<sub>3'</sub>), 40.4 (C<sub>2'</sub>), 63.5 (C<sub>5'</sub>), 87.2 (C<sub>4'</sub>), 91.5 (C<sub>1'</sub>), 124.0, 125.0 (C<sub>7'</sub>+C<sub>8'</sub>), 133.1 (C<sub>5</sub>), 144.7 (C<sub>8</sub>), 150.7 (C<sub>4</sub>), 151.6 (C<sub>2</sub>), 151.7 (C<sub>6</sub>); MS (ESI<sup>+</sup>, *m/z*): 329 [(M<sup>35</sup>Cl+Na)<sup>+</sup>, 100%] and 331 [(M<sup>37</sup>Cl+Na)<sup>+</sup>, 20]; Exact mass found for C<sub>14</sub>H<sub>15</sub>ClN<sub>4</sub>O<sub>2</sub>: 306.0682.

**HIBF-β-6-Aminopurine (22i).** From **20f** using Method B. R<sub>f</sub> (5% CH<sub>2</sub>Cl<sub>2</sub>/MeOH): 0.20; [ $\alpha$ ]<sub>D</sub><sup>20</sup> = -19.6 (c 0.8, DMSO); <sup>1</sup>H NMR (CDCl<sub>3</sub>, 400 MHz): δ 1.95-2.12 (m, 2H, H<sub>6'</sub>+H<sub>9'</sub>), 2.37-2.49 (m, 2H, H<sub>6'</sub>+H<sub>9'</sub>), 2.67 (m, 1H, H<sub>3'</sub>), 3.42 (m, 1H, H<sub>2'</sub>), 3.76 (dd, 1H, H<sub>5'</sub>, <sup>2</sup>J 12.4 Hz, <sup>3</sup>J 3.6 Hz), 4.06 (m, 2H, H<sub>4'</sub>+H<sub>5'</sub>), 5.79 (m, 3H, H<sub>7'</sub>+H<sub>8'</sub>, H<sub>1'</sub>), 5.90 (m, 2H, NH<sub>2</sub>), 7.90 (s, 1H, H<sub>8</sub>), 8.35 (s, 1H, H<sub>2</sub>); <sup>13</sup>C NMR (CDCl<sub>3</sub>, 100.6 MHz): δ 22.8, 25.2 (C<sub>6'</sub>+C<sub>9'</sub>), 34.4 (C<sub>3'</sub>), 39.8 (C<sub>2'</sub>), 64.7 (C<sub>5'</sub>), 88.8 (C<sub>4'</sub>), 91.5 (C<sub>1'</sub>), 121.1 (C<sub>5</sub>), 124.9, 125.6 (C<sub>7'</sub>+C<sub>8'</sub>), 140.9 (C<sub>8</sub>), 148.6 (C<sub>4</sub>), 152.2 (C<sub>2</sub>), 155.9 (C<sub>6</sub>); MS (ESI<sup>+</sup>, *m/z*): 288 [(M+H)<sup>+</sup>, 100%] and 310 [(M+Na)<sup>+</sup>, 60]; Exact

mass found for C<sub>14</sub>H<sub>17</sub>N<sub>5</sub>O<sub>2</sub>: 287.0713.

**HIBF- $\beta$ -6-Amino-2-chloropurine (22j).** From **20g** using Method B.  $R_f$  (10% EtOAc/MeOH): 0.44;  $[\alpha]_D^{20} = -8.5$  (c 0.3, DMSO);  $^1\text{H NMR}$  (CD<sub>2</sub>Cl<sub>2</sub>, 400 MHz):  $\delta$  2.05 (m, 2H, H<sub>6'</sub>+H<sub>9'</sub>), 2.42 (m, 2H, H<sub>6'</sub>+H<sub>9'</sub>), 2.72 (m, 1H, H<sub>3'</sub>), 3.16 (m, 1H, H<sub>2'</sub>), 3.77 (dd, 1H, H<sub>5'</sub>,  $^2J$  13.2 Hz,  $^3J$  3.6 Hz), 3.77 (dd, 1H, H<sub>5'</sub>,  $^2J$  13.2 Hz,  $^3J$  3.6 Hz), 4.02 (m, 2H, H<sub>4'</sub>+H<sub>5'</sub>), 5.79 (m, 2H, H<sub>7'</sub>+H<sub>8'</sub>), 5.83 (d, 1H, H<sub>1'</sub>,  $^3J$  6.0 Hz), 6.54 (brs, 2H, NH<sub>2</sub>), 8.08 (s, 1H, H<sub>8</sub>);  $^{13}\text{C NMR}$  (CD<sub>2</sub>Cl<sub>2</sub>, 100.6 MHz):  $\delta$  23.4, 25.5 (C<sub>6'</sub>+C<sub>9'</sub>), 35.4 (C<sub>3'</sub>), 40.8 (C<sub>2'</sub>), 63.8 (C<sub>5'</sub>), 87.7 (C<sub>4'</sub>), 91.2 (C<sub>1'</sub>), 119.8 (C<sub>5</sub>), 124.6, 125.5 (C<sub>7'</sub>+C<sub>8'</sub>), 140.9 (C<sub>8</sub>), 150.4 (C<sub>4</sub>), 154.9 (C<sub>2</sub>), 156.9 (C<sub>6</sub>);  $\text{MS}$  (ESI<sup>+</sup>,  $m/z$ ): 322 [(M<sup>35</sup>Cl+H)<sup>+</sup>, 100%], 324 [(M<sup>37</sup>Cl+H)<sup>+</sup>, 20], 344 [(M<sup>35</sup>Cl+Na)<sup>+</sup>, 80], and 346 [(M<sup>37</sup>Cl+Na)<sup>+</sup>, 10]; C<sub>14</sub>H<sub>16</sub>ClN<sub>5</sub>O<sub>2</sub>.

**HIBF- $\beta$ -6-Methoxypurine (22k).** From **20f** using Method C.  $R_f$  (EtOAc): 0.39;  $^1\text{H NMR}$  (CDCl<sub>3</sub>, 500 MHz):  $\delta$  1.83 (m, 1H, H<sub>6'</sub> or H<sub>9'</sub>), 2.08 (m, 1H, H<sub>6'</sub> or H<sub>9'</sub>), 2.33, 2.42 (2m, 2H, H<sub>6'</sub>, H<sub>9'</sub>), 2.74 (m, 1H, H<sub>3'</sub>), 3.45 (m, 1H, H<sub>2'</sub>), 3.75 (m, 1H, H<sub>5'</sub>), 4.08 (m, 2H, H<sub>5'</sub>+H<sub>4'</sub>), 4.19 (s, 3H, OMe), 5.50 (m, 1H, OH), 5.76 (m, 3H, H<sub>1'</sub>, H<sub>7'</sub>, H<sub>8'</sub>), 8.05 (s, 1H, H<sub>8</sub>), 8.55 (s, 1H, H<sub>2</sub>);  $\text{MS}$  (ESI<sup>+</sup>,  $m/z$ ): 325 [(M+Na)<sup>+</sup>, 100%]; Exact mass found for C<sub>15</sub>H<sub>18</sub>N<sub>4</sub>O<sub>3</sub>: 302.0774.

**HIBF- $\beta$ -2-Chloro-6-methoxypurine (22l).** From **20g** using Method C.  $R_f$  (EtOAc): 0.44;  $^1\text{H NMR}$  (CDCl<sub>3</sub>, 600 MHz):  $\delta$  2.01 (m, 2H, H<sub>6'</sub>+H<sub>9'</sub>), 2.39 (m, 2H, H<sub>6'</sub>+H<sub>9'</sub>), 2.72 (m, 1H, H<sub>3'</sub>), 3.23 (m, 1H, H<sub>2'</sub>), 3.80 (m, 1H, H<sub>5'</sub>), 4.04 (m, 2H, H<sub>4'</sub>+H<sub>5'</sub>), 5.79 (m, 3H, H<sub>1'</sub>, H<sub>7'</sub>, H<sub>8'</sub>), 8.12 (s, 1H, H<sub>8</sub>);  $\text{MS}$  (ESI<sup>+</sup>,  $m/z$ ): 359 [(M<sup>35</sup>Cl+Na)<sup>+</sup>, 100%] and 361 [(M<sup>37</sup>Cl+Na)<sup>+</sup>, 20]; Exact mass found for C<sub>15</sub>H<sub>17</sub>ClN<sub>4</sub>O<sub>3</sub>: 336.1102.

**HIBF- $\beta$ -2,6-Diaminopurine (22m).** From **20g** using Method B.  $R_f$  (10% EtOAc/MeOH): 0.17;  $[\alpha]_D^{20} = -19.1$  (c 2.5, DMSO);  $^1\text{H NMR}$  (MeOH-*d*<sub>4</sub>, 400 MHz):  $\delta$  2.27 (m, 2H, H<sub>6'</sub>+H<sub>9'</sub>), 2.57 (m, 2H, H<sub>6'</sub>+H<sub>9'</sub>), 2.78 (m, 1H, H<sub>3'</sub>), 3.14 (m, 1H, H<sub>2'</sub>), 3.90 (dd, 1H, H<sub>5'</sub>,  $^2J$  13.2 Hz,  $^3J$  3.6 Hz), 4.10 (m, 2H, H<sub>4'</sub>+H<sub>5'</sub>), 5.92 (m, 2H, H<sub>7'</sub>+H<sub>8'</sub>), 5.97 (d, 1H, H<sub>1'</sub>,  $^3J$  4.8 Hz), 8.31 (s, 1H, H<sub>8</sub>);  $^{13}\text{C NMR}$  (MeOH-*d*<sub>4</sub>, 100.6 MHz):  $\delta$  23.0 (C<sub>6'</sub>), 24.1 (C<sub>9'</sub>), 34.3 (C<sub>3'</sub>), 40.6 (C<sub>2'</sub>), 62.7 (C<sub>5'</sub>), 86.3 (C<sub>4'</sub>), 90.0 (C<sub>1'</sub>), 113.8 (C<sub>5</sub>), 124.4, 125.0 (C<sub>7'</sub>+C<sub>8'</sub>), 137.4 (C<sub>8</sub>), 151.1 (C<sub>4</sub>), 156.6 (C<sub>2</sub>), 160.6 (C<sub>6</sub>);  $\text{MS}$  (ESI<sup>+</sup>,  $m/z$ ): 303 [(M+H)<sup>+</sup>, 100%]; C<sub>14</sub>H<sub>18</sub>N<sub>6</sub>O<sub>2</sub>.

**HIBF- $\alpha$ -Thymine (23b).** From **21b** using Method A.  $R_f$  (50% hexane/EtOAc): 0.10;  $[\alpha]_D^{20} = -34.5$  (c 0.3, CHCl<sub>3</sub>);  $^1\text{H NMR}$  (CDCl<sub>3</sub>, 500 MHz):  $\delta$  1.61-1.82 (m, 2H, H<sub>6'</sub>, H<sub>9'</sub>), 1.94 (s, 3H, Me), 2.36 (m, 2H, H<sub>6'</sub>, H<sub>9'</sub>), 2.62 (m, 1H, H<sub>3'</sub>), 2.85 (m, 1H, H<sub>2'</sub>), 3.81 (m, 1H, H<sub>4'</sub>), 3.92 (ddd, 1H, H<sub>5'</sub>,  $^2J$  12 Hz,  $^3J$  6.0 Hz,  $^4J$  3.0 Hz), 4.06 (m, 1H, H<sub>5'</sub>), 5.69 (m, 2H, H<sub>7'</sub>+H<sub>8'</sub>), 5.89 (d, 1H, H<sub>1'</sub>,  $^3J$  4.0 Hz), 7.45 (d, 1H, H<sub>6</sub>,  $^4J$  1.0 Hz), 8.19 (br s, 1H, NH);  $^{13}\text{C NMR}$  (CDCl<sub>3</sub>, 100.6 MHz):  $\delta$  12.9 (Me), 19.9, 23.0 (C<sub>6'</sub>+C<sub>9'</sub>), 35.1 (C<sub>3'</sub>), 37.6 (C<sub>2'</sub>), 63.2 (C<sub>5'</sub>), 83.0 (C<sub>4'</sub>), 89.9 (C<sub>1'</sub>), 109.3 (C<sub>5</sub>), 123.8, 124.6 (C<sub>7'</sub>+C<sub>8'</sub>), 136.2 (C<sub>6</sub>), 150.1 (C<sub>2</sub>), 163.9 (C<sub>4</sub>);  $\text{MS}$  (ESI<sup>+</sup>,  $m/z$ ): 301 [(M+Na)<sup>+</sup>, 100%]; Exact mass found for C<sub>14</sub>H<sub>18</sub>N<sub>2</sub>O<sub>4</sub>: 278.1260.

**HIBF- $\alpha$ -5-Bromovinyluracil (23d).** From **21d** using Method A.  $R_f$  (50% hexane/EtOAc): 0.14;  $^1\text{H NMR}$  (CDCl<sub>3</sub>, 600 MHz):  $\delta$  1.66 (m, 1H, H<sub>6'</sub> or H<sub>9'</sub>), 1.82 (m, 1H, H<sub>9'</sub> or H<sub>6'</sub>), 2.01, 2.38 (2m, 2H, H<sub>6'</sub>, H<sub>9'</sub>), 2.67 (m, 1H, H<sub>3'</sub>), 2.89 (m, 1H, H<sub>2'</sub>), 3.69 (m, 1H, H<sub>4'</sub>), 3.95 (d, 1H, H<sub>5'</sub>,  $^2J$  12.0 Hz), 4.08 (d, 1H, H<sub>5'</sub>,  $^2J$  12.0 Hz), 5.70 (m, 2H, H<sub>7'</sub>+H<sub>8'</sub>), 5.92 (d, 1H, H<sub>1'</sub>,  $^3J$  4.0 Hz), 6.73 (d, 1H, H<sub>7</sub>,  $^3J$  13.8 Hz), 7.43 (d, 1H, H<sub>8</sub>,  $^3J$  13.8 Hz), 7.64 (s, 1H, H<sub>6</sub>), 8.12 (br s, 1H, NH);  $\text{MS}$  (ESI<sup>+</sup>,  $m/z$ ): 369 [(M<sup>79</sup>Br+H)<sup>+</sup>, 100] and 371 [(M<sup>81</sup>Br+H)<sup>+</sup>, 96]; Exact mass found for C<sub>15</sub>H<sub>17</sub>BrN<sub>2</sub>O<sub>4</sub>: 368.0874.

**HIBF- $\alpha$ -6-Chloropurine (23f).** From **21f** using Method A.  $R_f$  (EtOAc): 0.40;  $[\alpha]_D^{20} = -9.7$  (c 0.8, CHCl<sub>3</sub>);  $^1\text{H NMR}$  (CDCl<sub>3</sub>, 600 MHz):  $\delta$  1.50-1.75 (m, 2H, H<sub>6'</sub>+H<sub>9'</sub>), 2.00, 2.48 (m, 2H, H<sub>6'</sub>+H<sub>9'</sub>), 2.83 (m, 1H, H<sub>3'</sub>), 3.06 (m, 1H, H<sub>2'</sub>), 3.75 (dd, 1H, H<sub>5'</sub>,  $^2J$  12.6 Hz,  $^3J$  4.2 Hz), 4.02 (dd, 1H, H<sub>5'</sub>,  $^2J$  12.6 Hz,  $^3J$  2.4 Hz), 4.23 (dt, 1H, H<sub>4'</sub>,  $^3J$  10.2 Hz,  $^3J$  3 Hz), 5.67 (m, 2H, H<sub>7'</sub>+H<sub>8'</sub>), 6.40 (d, 1H, H<sub>1'</sub>,  $^3J$  4.2 Hz), 8.43 (s, 1H, H<sub>8</sub>), 8.74 (s, 1H, H<sub>2</sub>);  $^{13}\text{C NMR}$  (CDCl<sub>3</sub>, 150.9 MHz):  $\delta$  19.7, 23.1 (C<sub>6'</sub>+C<sub>9'</sub>), 35.2 (C<sub>3'</sub>), 38.2 (C<sub>2'</sub>), 62.8 (C<sub>5'</sub>), 83.2 (C<sub>4'</sub>), 89.5 (C<sub>1'</sub>), 123.5, 124.3

(C<sub>7</sub>+C<sub>8</sub>), 132.1 (C<sub>5</sub>), 143.3 (C<sub>8</sub>), 150.7 (C<sub>4</sub>), 152.0 (C<sub>2</sub>), 155.5 (C<sub>6</sub>); MS (ESI<sup>+</sup>, *m/z*): 329 [(M<sup>35</sup>Cl+Na)<sup>+</sup>, 100%] and 331 [(M<sup>37</sup>Cl+Na)<sup>+</sup>, 30]; Exact mass found for C<sub>14</sub>H<sub>15</sub>ClN<sub>4</sub>O<sub>2</sub>: 306.0548.

**HIBF- $\alpha$ -6-Aminopurine (23i).** From **21f** using Method B. R<sub>f</sub> (5% CH<sub>2</sub>Cl<sub>2</sub>/MeOH): 0.09; [ $\alpha$ ]<sub>D</sub><sup>20</sup> = -9.6 (c 2.5, MeOH); <sup>1</sup>H NMR (MeOH-*d*<sub>4</sub>, 400 MHz):  $\delta$  1.50, 1.85 (2m, 2H, H<sub>6</sub>+H<sub>9</sub>), 2.10, 2.42 (2m, 2H, H<sub>6</sub>+H<sub>9</sub>), 2.75 (m, 1H, H<sub>3</sub>), 2.90 (m, 1H, H<sub>2</sub>), 3.75 (dd, 1H, H<sub>5</sub>, <sup>2</sup>J 12.2 Hz, <sup>3</sup>J 4.8 Hz), 3.95 (m, 1H, H<sub>5</sub>, <sup>2</sup>J 12.2 Hz, <sup>3</sup>J 2.8 Hz), 4.16 (m, 1H, H<sub>4</sub>), 5.74 (m, 2H, H<sub>7</sub>+H<sub>8</sub>), 6.39 (d, 1H, H<sub>1</sub>, <sup>3</sup>J 4.4 Hz), 8.23 (s, 1H, H<sub>8</sub>), 8.33 (s, 1H, H<sub>2</sub>); <sup>13</sup>C NMR (MeOH-*d*<sub>4</sub>, 100.6 MHz):  $\delta$  19.4, 22.9 (C<sub>6</sub>+C<sub>9</sub>), 35.5 (C<sub>3</sub>), 38.3 (C<sub>2</sub>), 62.1 (C<sub>5</sub>), 83.5 (C<sub>4</sub>), 89.0 (C<sub>1</sub>), 119.0 (C<sub>5</sub>), 123.4, 124.2 (C<sub>7</sub>+C<sub>8</sub>), 139.0 (C<sub>8</sub>), 148.2 (C<sub>4</sub>), 152.4 (C<sub>2</sub>), 155.9 (C<sub>6</sub>); MS (ESI<sup>+</sup>, *m/z*): 288 [(M+H)<sup>+</sup>, 100%] and 310 [(M+Na)<sup>+</sup>, 60]; Exact mass found for C<sub>14</sub>H<sub>17</sub>N<sub>5</sub>O<sub>2</sub>: 287.0772.

**HIBF- $\alpha$ -6-Amino-2-chloropurine (23j).** From **21g** using Method B. R<sub>f</sub> (6.6% EtOAc/MeOH): 0.37; [ $\alpha$ ]<sub>D</sub><sup>20</sup> = -25.9 (c 1.0, DMSO); <sup>1</sup>H NMR (MeOH-*d*<sub>4</sub>, 400 MHz):  $\delta$  1.73 (m, 1H, H<sub>6</sub>), 2.02 (m, 1H, H<sub>9</sub>), 2.26 (m, 1H, H<sub>6</sub>), 2.58 (m, 1H, H<sub>9</sub>), 2.91 (m, 1H, H<sub>3</sub>), 3.07 (m, 1H, H<sub>2</sub>), 3.85 (dd, 1H, H<sub>5</sub>, <sup>2</sup>J 12.2 Hz, <sup>3</sup>J 4.6 Hz), 4.05 (dd, 1H, H<sub>5</sub>, <sup>2</sup>J 12.2 Hz, <sup>3</sup>J 2.8 Hz), 4.35 (ddd, 1H, H<sub>4</sub>, <sup>3</sup>J 9.5 Hz, 4.6 Hz, 2.8 Hz), 5.79 (m, 2H, H<sub>7</sub>+H<sub>8</sub>), 6.42 (d, 1H, H<sub>1</sub>, <sup>3</sup>J 4.4 Hz), 8.42 (s, 1H, H<sub>8</sub>); <sup>13</sup>C NMR (MeOH-*d*<sub>4</sub>, 100.6 MHz):  $\delta$  19.8 (C<sub>6</sub>), 23.3 (C<sub>9</sub>), 35.9 (C<sub>3</sub>), 38.7 (C<sub>2</sub>), 62.5 (C<sub>5</sub>), 84.0 (C<sub>4</sub>), 89.3 (C<sub>1</sub>), 118.2 (C<sub>5</sub>), 123.8, 124.6, (C<sub>7</sub>+C<sub>8</sub>), 139.7 (C<sub>8</sub>), 150.0 (C<sub>4</sub>), 154.3 (C<sub>2</sub>), 157.0 (C<sub>6</sub>); MS (ESI<sup>+</sup>, *m/z*): 322 [(M<sup>35</sup>Cl+H)<sup>+</sup>, 100%] and 324 [(M<sup>37</sup>Cl+H)<sup>+</sup>, 20]; C<sub>14</sub>H<sub>16</sub>ClN<sub>5</sub>O<sub>2</sub>.

**HIBF- $\alpha$ -2,6-Diaminopurine (23m).** From **21g** using Method B. R<sub>f</sub> (10% EtOAc/MeOH): 0.12; [ $\alpha$ ]<sub>D</sub><sup>20</sup> = -59.8 (c 0.8, MeOH); <sup>1</sup>H NMR (MeOH-*d*<sub>4</sub>, 600 MHz):  $\delta$  1.72 (m, 1H, H<sub>6</sub>), 2.04 (m, 1H, H<sub>6</sub>), 2.26 (m, 1H, H<sub>9</sub>), 2.58 (m, 1H, H<sub>9</sub>), 2.89 (m, 1H, H<sub>3</sub>), 3.06 (m, 1H, H<sub>2</sub>), 3.84 (dd, 1H, H<sub>5</sub>, <sup>2</sup>J 12.0 Hz, <sup>3</sup>J 4.8 Hz), 4.03 (dd, 1H, H<sub>5</sub>, <sup>2</sup>J 12.0 Hz, <sup>3</sup>J 3.0 Hz), 4.29 (m, 1H, H<sub>4</sub>), 5.81 (m, 2H, H<sub>7</sub>+H<sub>8</sub>), 6.32 (d, 1H, H<sub>1</sub>, <sup>3</sup>J 4.8 Hz), 8.12 (s, 1H, H<sub>8</sub>); <sup>13</sup>C NMR (MeOH-*d*<sub>4</sub>, 150.9 MHz):  $\delta$  19.4 (C<sub>6</sub>), 22.9 (C<sub>9</sub>), 35.5 (C<sub>3</sub>), 38.1 (C<sub>2</sub>), 62.1 (C<sub>5</sub>), 83.2 (C<sub>4</sub>), 88.5 (C<sub>1</sub>), 113.0 (C<sub>5</sub>), 123.6, 124.1 (C<sub>7</sub>+C<sub>8</sub>), 136.0 (C<sub>8</sub>), 150.5 (C<sub>4</sub>), 156.1 (C<sub>2</sub>), 160.4 (C<sub>6</sub>); MS (ESI<sup>+</sup>, *m/z*): 303 [(M+H)<sup>+</sup>, 100%]; C<sub>14</sub>H<sub>18</sub>N<sub>6</sub>O<sub>2</sub>.

**HIBF- $\alpha$ / $\beta$ -Uracil (24a).** From **20a+21a** using Method A. R<sub>f</sub> (EtOAc): 0.40 $\beta$ , 0.36 $\alpha$ ; <sup>1</sup>H NMR (CDCl<sub>3</sub>, 500 MHz):  $\delta$  1.80-2.89 (m, 12H, 4H<sub>6</sub>, 4H<sub>9</sub>, 2H<sub>2</sub>, 2H<sub>3</sub>), 3.48 (d, 1H, OH, <sup>3</sup>J 3.5 Hz), 3.64 (m, 1H), 3.79 (dt, 1H, H<sub>5</sub>, <sup>2</sup>J 12.0 Hz, <sup>3</sup>J 3.0 Hz), 3.92 (m, 1H), 3.96 (dt, 1H, H<sub>3</sub>, <sup>3</sup>J 9.0 Hz, <sup>3</sup>J 3.0 Hz), 4.07 (m, 2H), 5.70 (m, 7H, 2H<sub>7</sub>+2H<sub>8</sub>+H<sub>1</sub>+2H<sub>5</sub>), 5.90 (d, 1H, H<sub>1</sub>, <sup>3</sup>J 4.5 Hz), 7.65 (d, 1H, H<sub>6</sub>, <sup>3</sup>J 8.0 Hz), 8.05 (d, 1H, H<sub>6</sub>, <sup>3</sup>J 8.5 Hz), 8.60 (br s, 1H, NH), 8.73 (br s, 1H, NH); <sup>13</sup>C NMR (CDCl<sub>3</sub>, 100.6 MHz):  $\delta$  19.8, 23.0, 23.1, 23.7 (C<sub>6</sub>+C<sub>9</sub>), 32.7 (C<sub>3</sub>), 35.1 (C<sub>3</sub>), 37.6 (C<sub>2</sub>), 41.6 (C<sub>2</sub>), 62.0 (C<sub>5</sub>), 63.0 (C<sub>5</sub>), 83.1 (C<sub>4</sub>), 85.0 (C<sub>4</sub>), 90.1 (C<sub>1</sub>), 91.2 (C<sub>1</sub>), 101.0 (C<sub>5</sub>), 101.4 (C<sub>5</sub>), 123.7, 124.6, 124.7, 124.8 (2C<sub>7</sub>+2C<sub>8</sub>), 140.4 (C<sub>6</sub>), 141.0 (C<sub>6</sub>), 150.3 (C<sub>2</sub>), 150.7 (C<sub>2</sub>), 163.6 (C<sub>4</sub>), 163.7 (C<sub>4</sub>); MS (ESI<sup>+</sup>, *m/z*): 287 [(M+Na)<sup>+</sup>, 100%].

**HIBF- $\alpha$ / $\beta$ -Cytosine (24h).** From **20h+21h** using Method A. R<sub>f</sub> (EtOAc/MeOH 10%): 0.20; [ $\alpha$ ]<sub>D</sub><sup>20</sup> = -28.6 (c 0.7, MeOH); <sup>1</sup>H NMR (MeOH-*d*<sub>4</sub>, 500 MHz):  $\delta$  1.90-2.84 (m, 12H, 2H<sub>6</sub>+2H<sub>9</sub>+2H<sub>3</sub>+2H<sub>2</sub>), 3.62 (m, 1H), 3.74 (m, 1H), 3.82 (m, 1H), 3.90 (m, 1H), 3.94 (m, 1H), 4.00 (m, 1H), 5.66 (m, 1H, H<sub>1</sub>), 5.70 (m, 3H, H<sub>7</sub>+H<sub>8</sub>+H<sub>5</sub>), 5.86 (m, 4H, H<sub>1</sub>+H<sub>7</sub>+H<sub>8</sub>+H<sub>5</sub>), 7.86 (d, 1H, H<sub>6</sub>, <sup>3</sup>J 8.0 Hz), 8.33 (d, 1H, H<sub>6</sub>, <sup>3</sup>J 7.0 Hz); <sup>13</sup>C NMR (MeOH-*d*<sub>4</sub>, 100.6 MHz):  $\delta$  20.7, 23.6, 23.9, 24.8 (C<sub>6</sub>+C<sub>9</sub>), 33.3 (C<sub>3</sub>), 36.6 (C<sub>3</sub>), 38.8 (C<sub>2</sub>), 43.0 (C<sub>2</sub>), 61.8 (C<sub>5</sub>), 63.5 (C<sub>5</sub>), 84.3 (C<sub>4</sub>), 86.4 (C<sub>4</sub>), 91.5 (C<sub>1</sub>), 92.7 (C<sub>1</sub>), 94.6 (C<sub>5</sub>), 94.8 (C<sub>5</sub>), 124.8, 125.5, 125.6, 125.7 (C<sub>7</sub>+C<sub>8</sub>), 142.7 (C<sub>6</sub>), 142.9 (C<sub>6</sub>), 158.2 (C<sub>2</sub>), 158.4 (C<sub>2</sub>), 167.7 (C<sub>4</sub>), 167.8 (C<sub>4</sub>); MS (ESI<sup>+</sup>, *m/z*): 264 [(M+H)<sup>+</sup>, 70%] and 286 [(M+Na)<sup>+</sup>, 100]; Exact mass found for C<sub>13</sub>H<sub>17</sub>N<sub>3</sub>O<sub>3</sub>: 263.1318.

**Synthesis of HIBF- $\beta$ -2,6-Diaminopurine (20m).** A solution of **20n** (30 mg, 0.076 mmol) in



a mixture THF/H<sub>2</sub>O was treated with Me<sub>3</sub>P (15.4 μL, 0.174 mmol). Immediately, N<sub>2</sub> gave off and the solution became yellowish. The reaction was stirred for 26 h and then solvents were removed. The residue was purified by silica gel chromatography (2-10% MeOH/EtOAc) to give **20m** in 73% yield.  $R_f$  (20% EtOAc/MeOH): 0.49;  $^1\text{H NMR}$  (CDCl<sub>3</sub>, 500 MHz): δ 2.06 (m, 2H, H<sub>6'</sub>+H<sub>9'</sub>), 2.09 (s, 3H, CH<sub>3</sub>), 2.34-2.47 (m, 3H, H<sub>3'</sub>, H<sub>6'</sub>, H<sub>9'</sub>), 3.04 (m, 1H, H<sub>2'</sub>), 4.13 (m, 1H, H<sub>4'</sub>), 4.40 (m, 2H, H<sub>5'</sub>), 4.72 (brs, 2H, NH<sub>2</sub>), 5.40 (br s, 2H, NH<sub>2</sub>), 5.75 (m, 2H, H<sub>7'</sub>+H<sub>8'</sub>), 5.78 (d, H<sub>1'</sub>,  $^3\text{J}$  3.5 Hz), 7.82 (s, 1H, H<sub>8</sub>);  $\text{MS}$  (ESI<sup>+</sup>,  $m/z$ ): 367 [(M+Na)<sup>+</sup>, 100%]; C<sub>16</sub>H<sub>20</sub>N<sub>6</sub>O<sub>3</sub>.

**Synthesis of HIBF-β-2,6-Diazidopurine (20n).** A solution of **20g** (0.262 mmol, 100 mg) in DMF (1.8 mL) was treated with NaN<sub>3</sub> (1.048 mmol, 68 mg) at 70 °C for 4 h. Solvent was removed and the residue obtained was purified by silica gel flash chromatography (gradient 30-50% EtOAc/hexane) to give **20n** in 76% yield.  $R_f$  (50% hexane/EtOAc): 0.47;  $^1\text{H NMR}$  (CDCl<sub>3</sub>, 400 MHz): δ 2.10 (m, 2H, H<sub>6'</sub>+H<sub>9'</sub>), 2.12 (s, 3H, CH<sub>3</sub>), 2.35-2.48 (m, 3H, H<sub>3'</sub>, H<sub>6'</sub>, H<sub>9'</sub>), 2.98 (m, 1H, H<sub>2'</sub>), 4.16 (m, 1H, H<sub>4'</sub>), 4.49 (m, 2H, H<sub>5'</sub>), 5.74 (m, 2H, H<sub>7'</sub>+H<sub>8'</sub>), 5.92 (s, 1H, H<sub>1'</sub>), 8.29 (s, 1H, H<sub>8</sub>);  $\text{MS}$  (ESI<sup>+</sup>,  $m/z$ ): 419 [(M+Na)<sup>+</sup>, 100%]; C<sub>16</sub>H<sub>20</sub>N<sub>10</sub>O<sub>3</sub>.

**Synthesis of HIBF-β-Hypoxanthine 22o.** Nucleoside **22i** (20 mg, 0.070 mmol) was dissolved in a phosphate buffer pH=7/ 3% DMSO (400 μL) and treated with 1 mg of ADA dissolved in that buffer (100 μL). The residue was purified by flash chromatography (gradient 5%-20% MeOH/EtOAc) to give **22o** (50%).  $R_f$  (10% EtOAc/MeOH): 0.10;  $^1\text{H NMR}$  (MeOH-*d*<sub>4</sub>, 600 MHz): δ 2.25 (m, 2H, H<sub>6'</sub>+H<sub>9'</sub>), 2.65 (m, 2H, H<sub>6'</sub>+H<sub>9'</sub>), 2.83 (m, 1H, H<sub>3'</sub>), 3.06 (m, 1H, H<sub>2'</sub>), 3.94 (dd, 1H, H<sub>5'</sub>,  $^2\text{J}$  12.3 Hz,  $^3\text{J}$  3.6 Hz), 4.12 (dd, 1H, H<sub>5'</sub>,  $^2\text{J}$  12.3 Hz,  $^3\text{J}$  3.0 Hz), 4.17 (dt, 1H, H<sub>4'</sub>,  $^3\text{J}$  8.4 Hz, 3.6 Hz), 5.96 (m, 2H, H<sub>7'</sub>+H<sub>8'</sub>), 6.17 (d, 1H, H<sub>1'</sub>,  $^3\text{J}$  3.6 Hz), 8.23 (s, 1H, H<sub>8</sub>), 8.73 (s, 1H, H<sub>2</sub>);  $^{13}\text{C NMR}$  (MeOH-*d*<sub>4</sub>, 150.9 MHz): δ 22.9, 23.0 (C<sub>6'</sub>+C<sub>9'</sub>), 33.1 (C<sub>3'</sub>), 41.3 (C<sub>2'</sub>), 61.4 (C<sub>5'</sub>), 85.7 (C<sub>4'</sub>), 90.1 (C<sub>1'</sub>), 123.8 (C<sub>7'</sub> or C<sub>8'</sub>), 124.4 (C<sub>5</sub>), 123.9 (C<sub>8'</sub> or C<sub>7'</sub>), 139.1 (C<sub>8</sub>), 145.2 (C<sub>4</sub>), 148.0 (C<sub>2</sub>), 157.5 (C<sub>6</sub>);  $\text{MS}$  (ESI<sup>+</sup>,  $m/z$ ): 289 [(M+H)<sup>+</sup>, 100%] and 311 [(M+Na)<sup>+</sup>, 60].

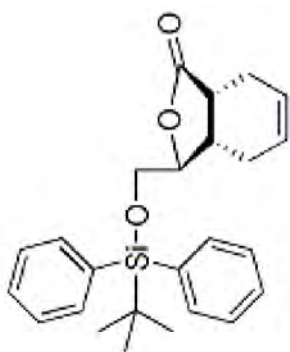

12

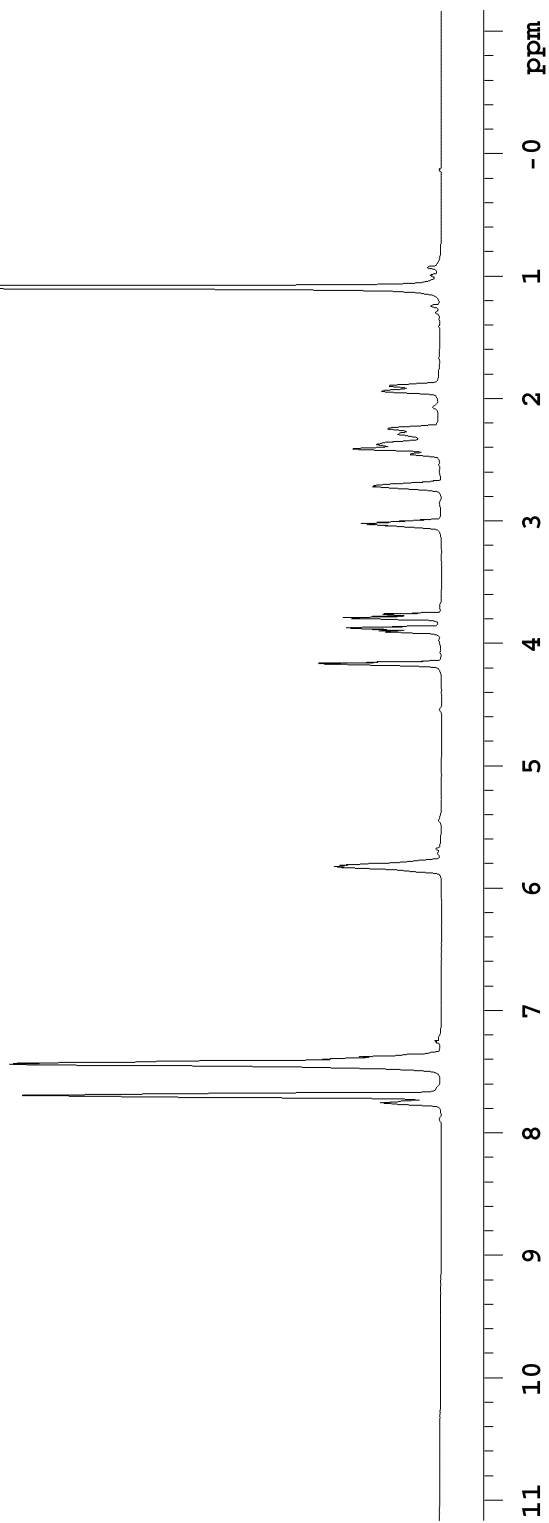



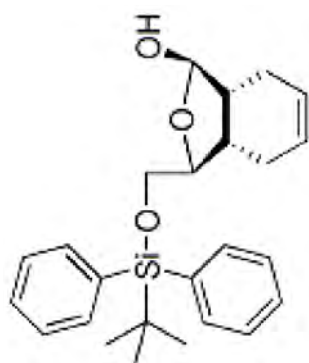

13

S12

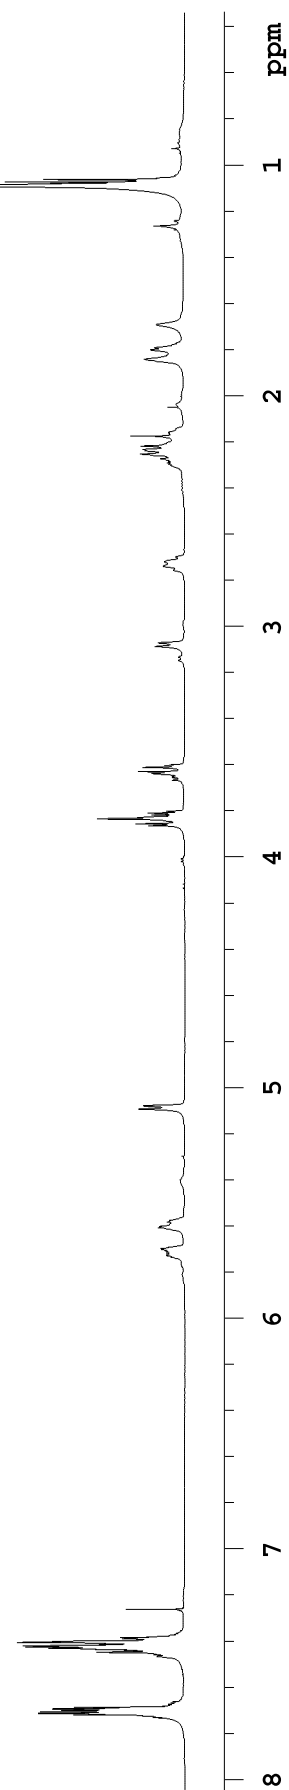

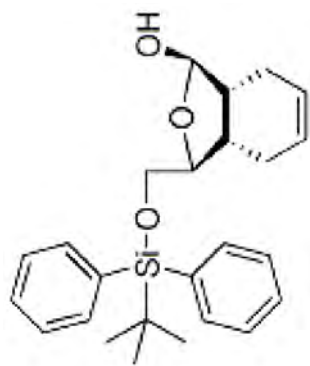

13

S13

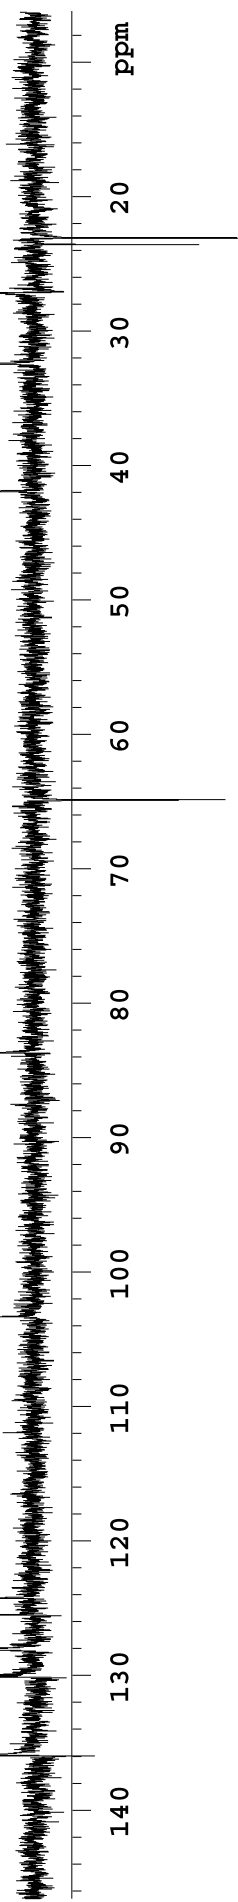

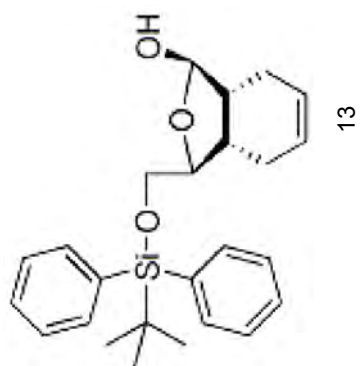

13

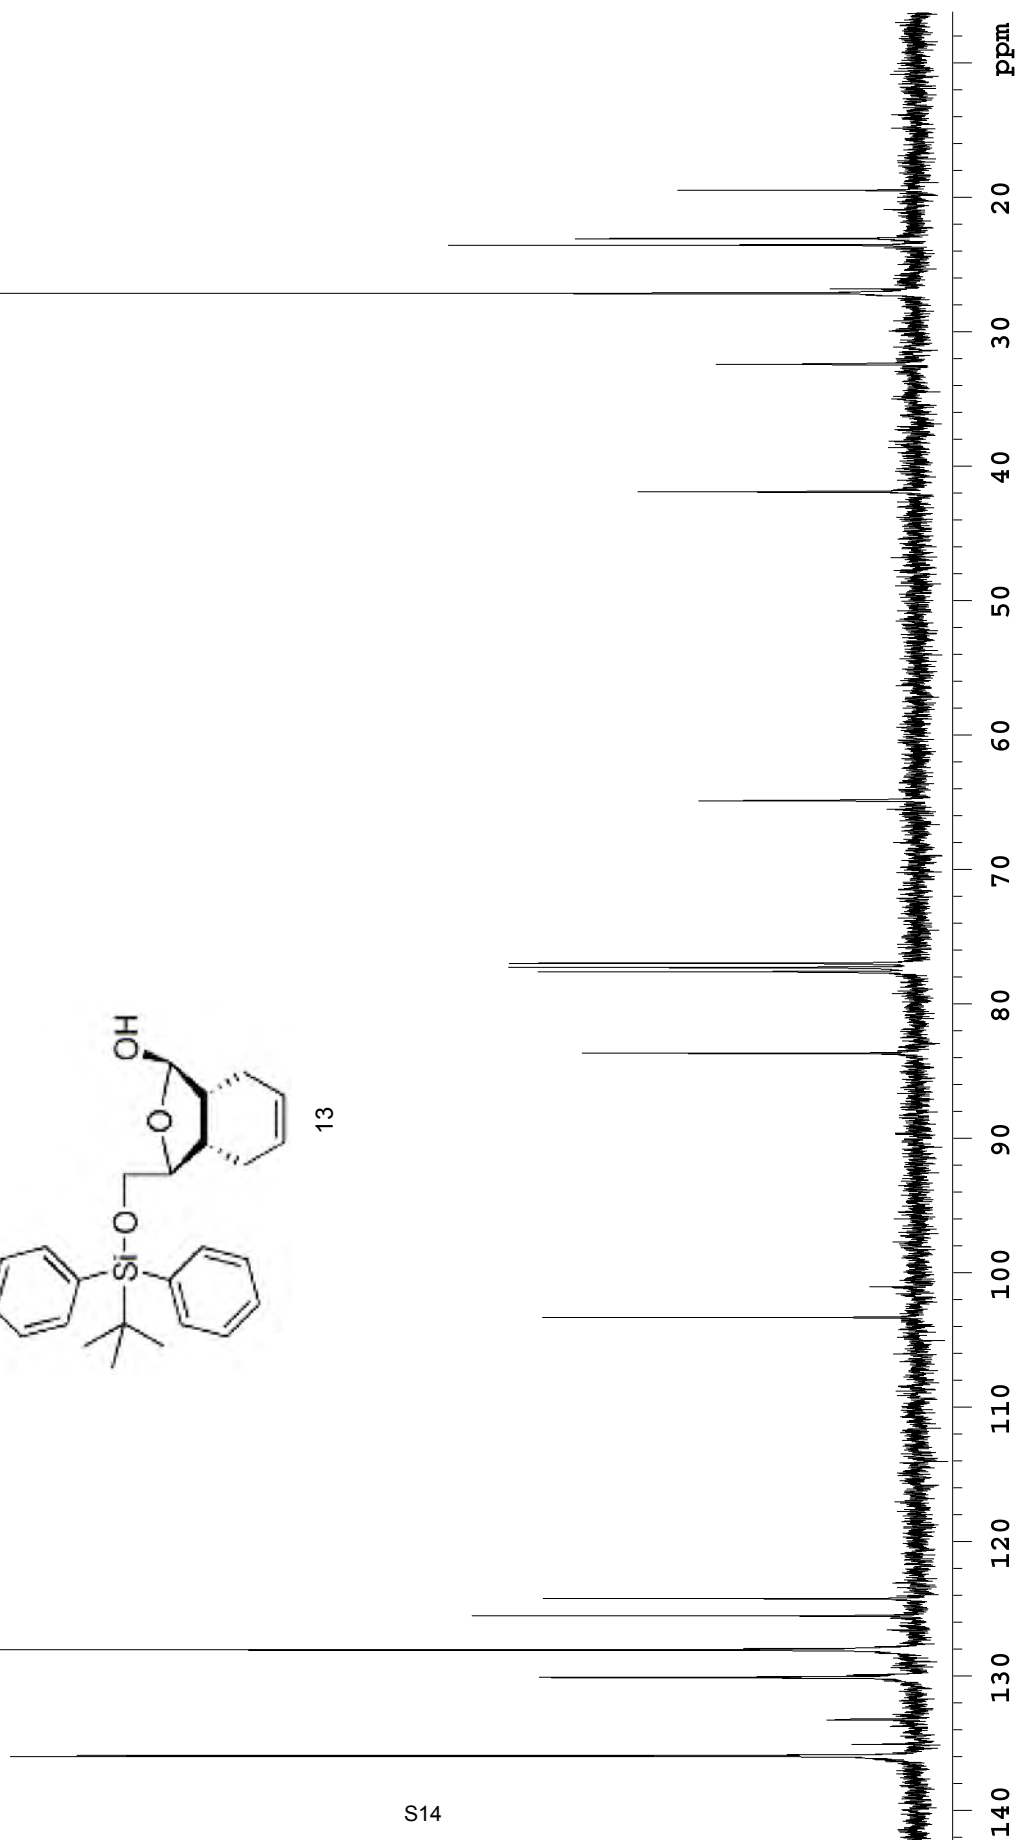

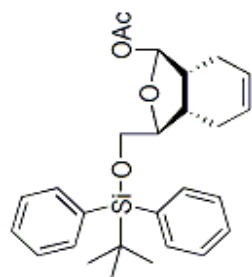

14

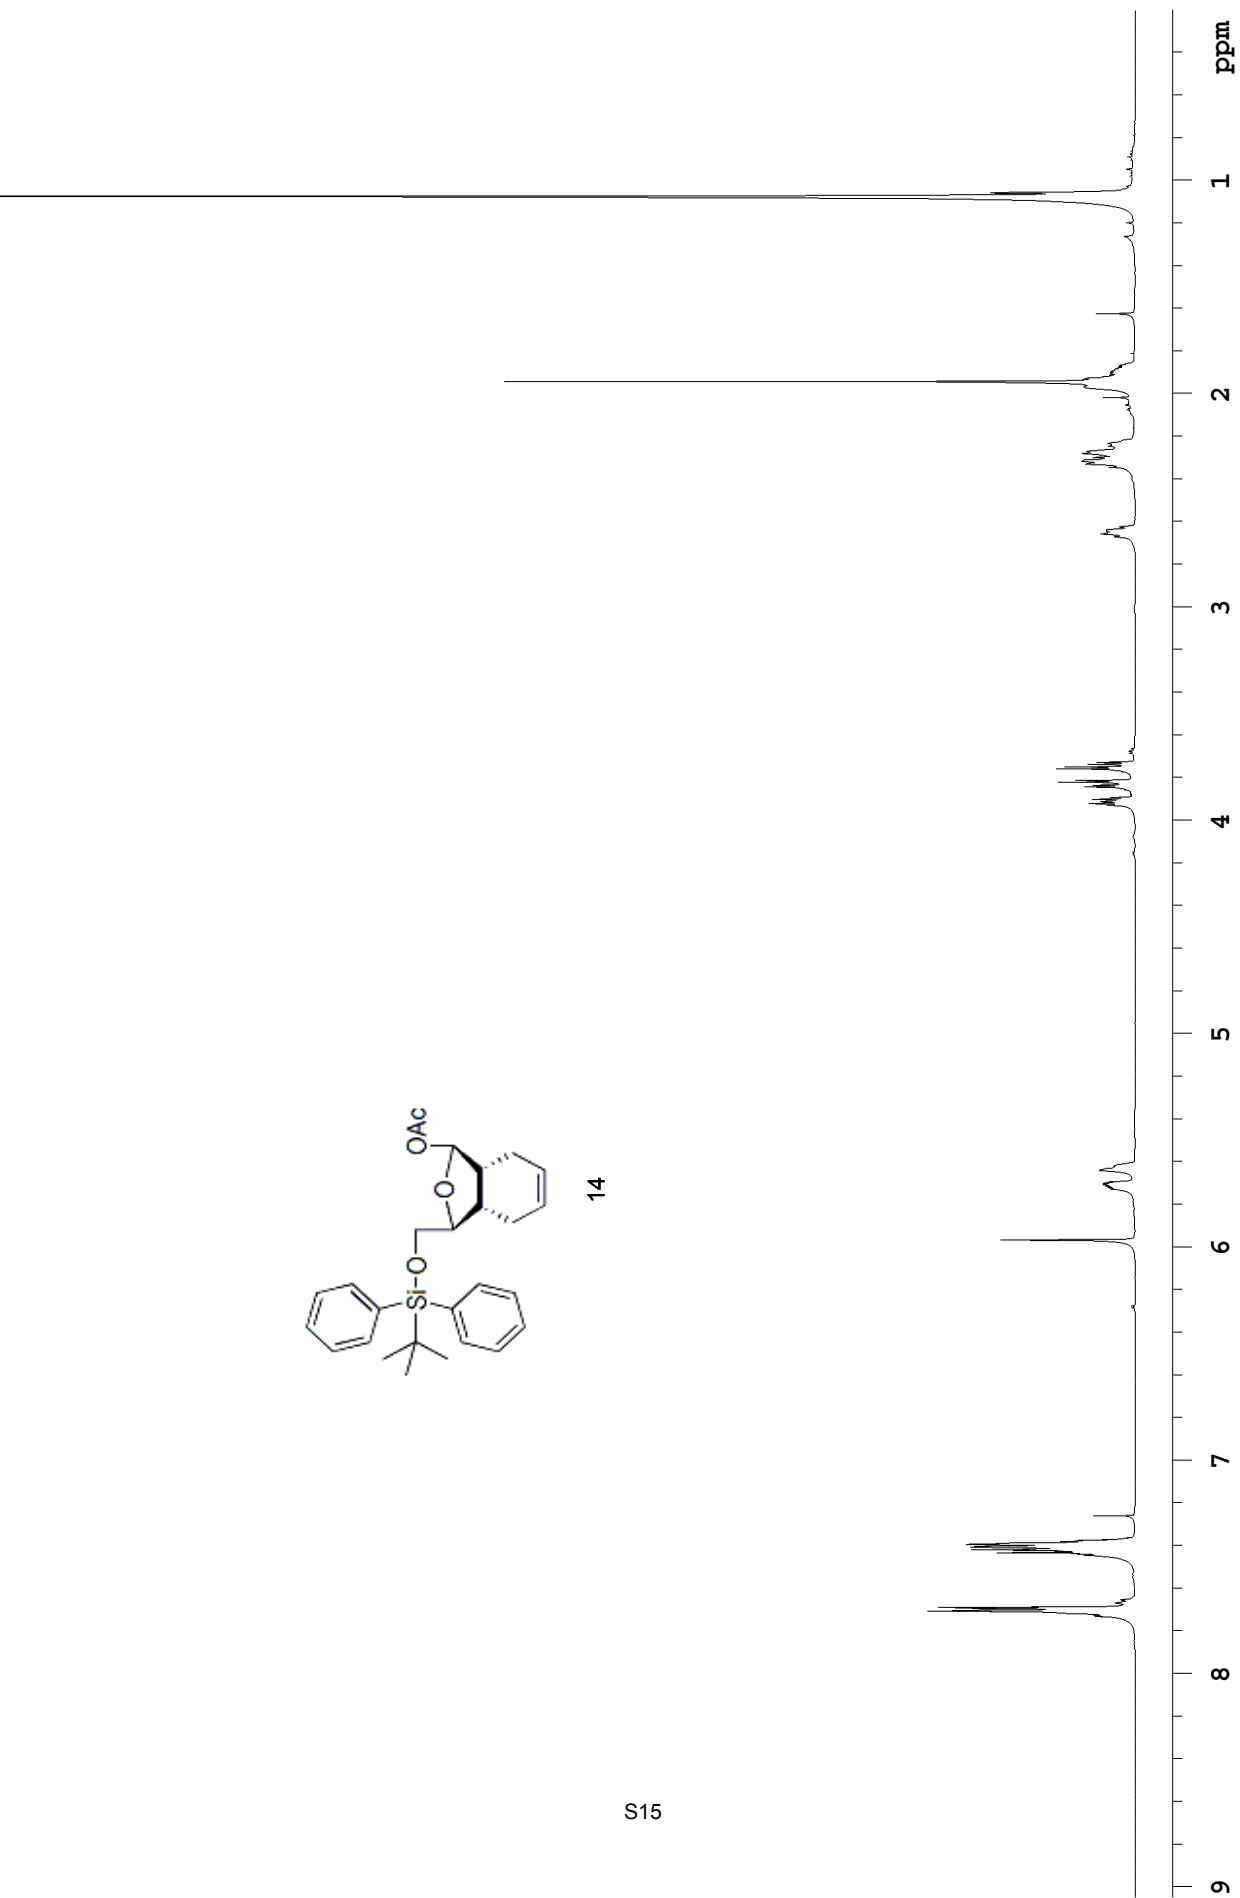

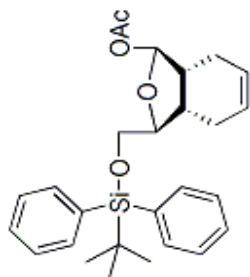

14

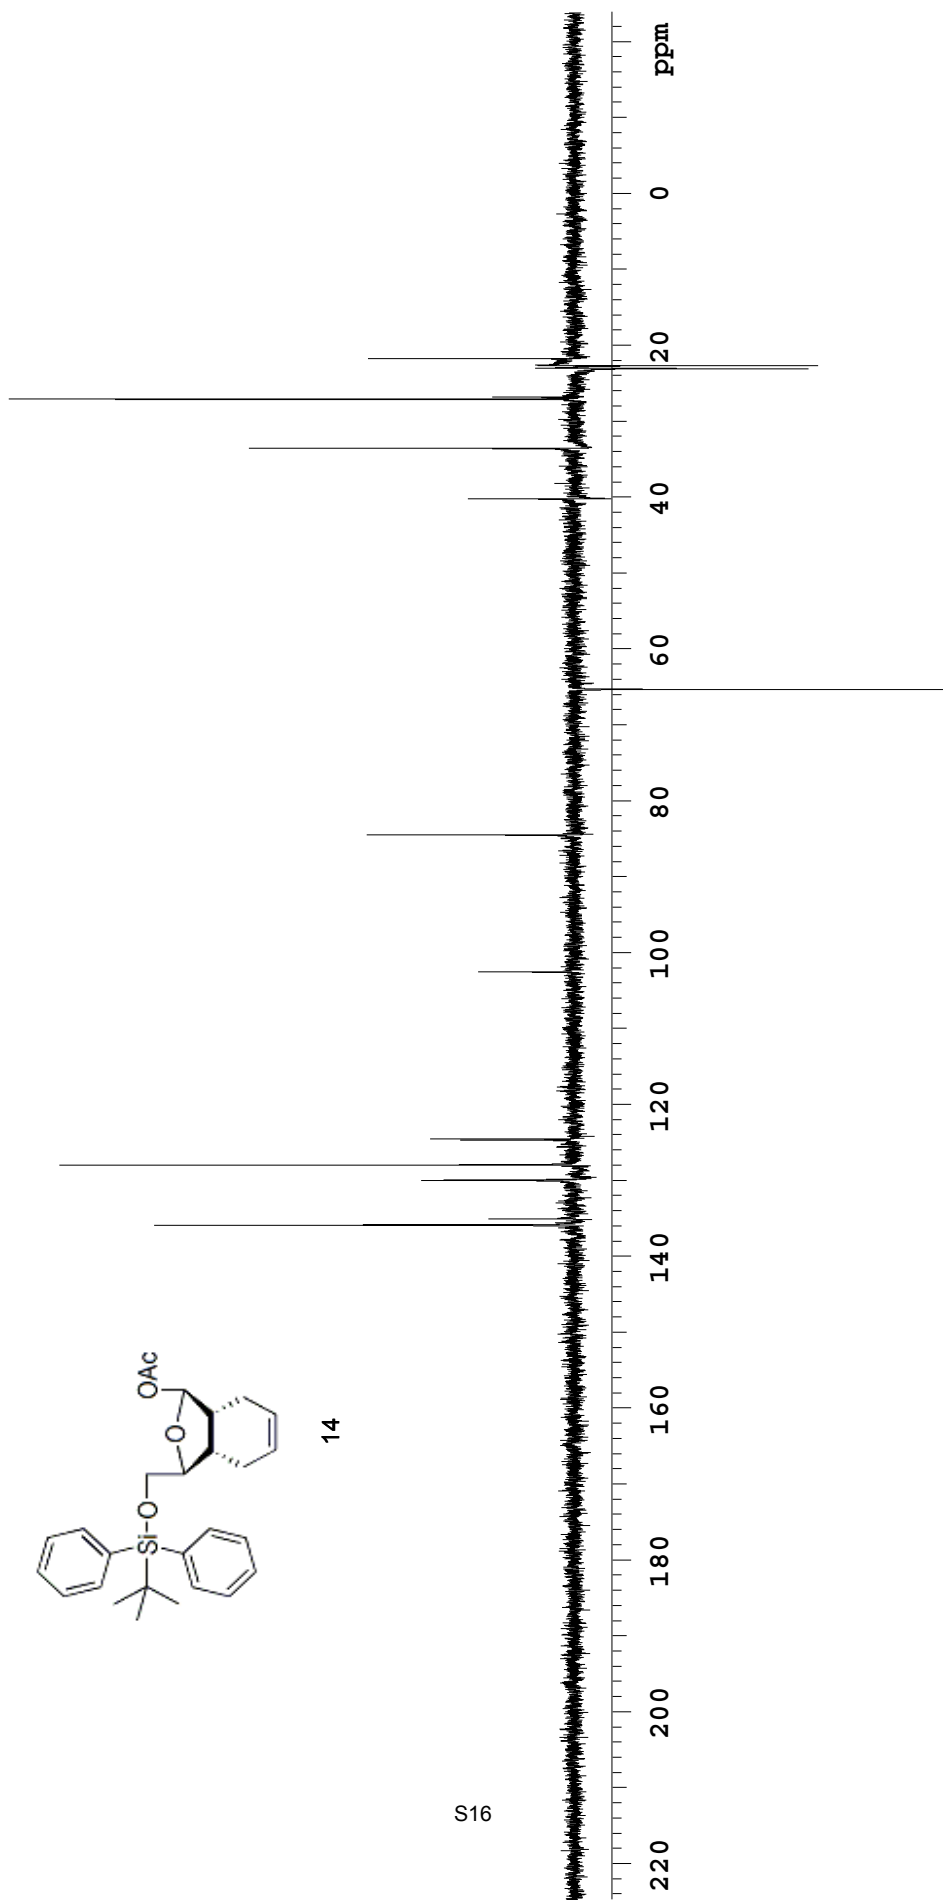



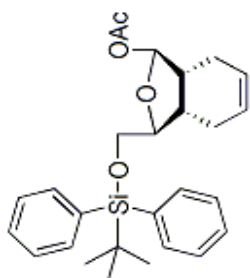

14

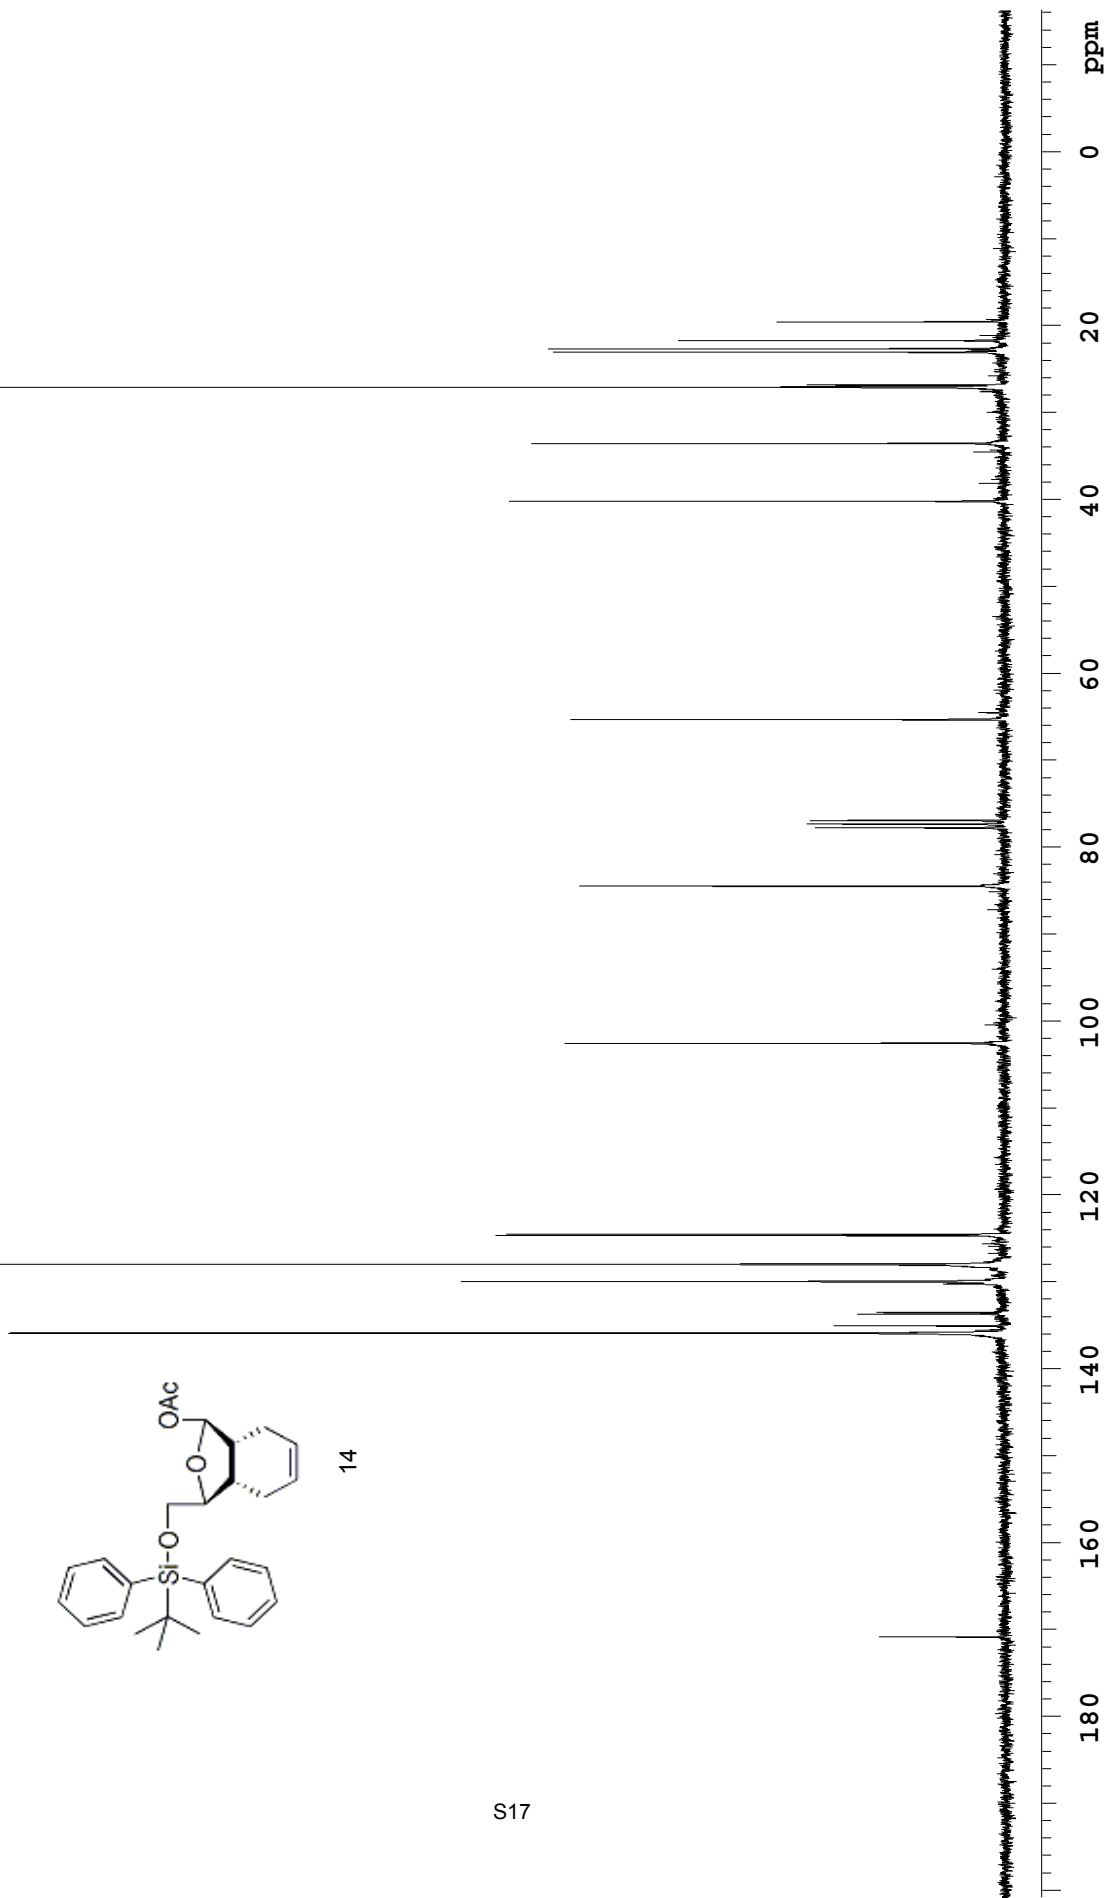

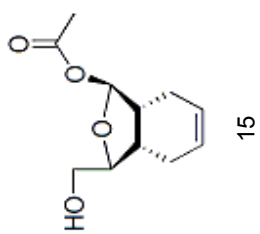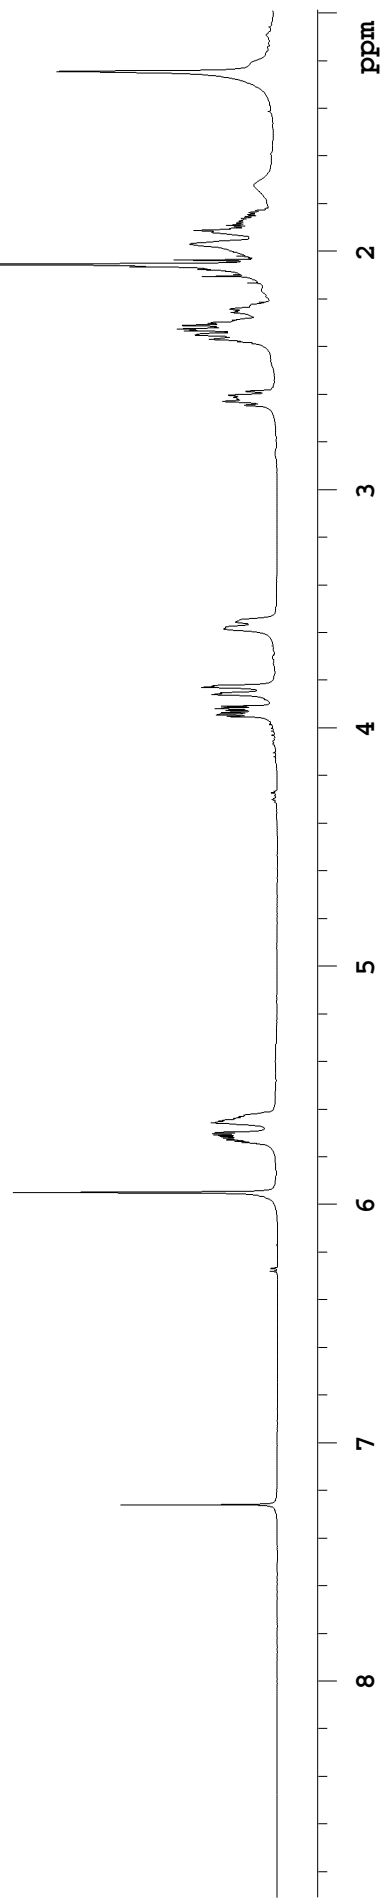

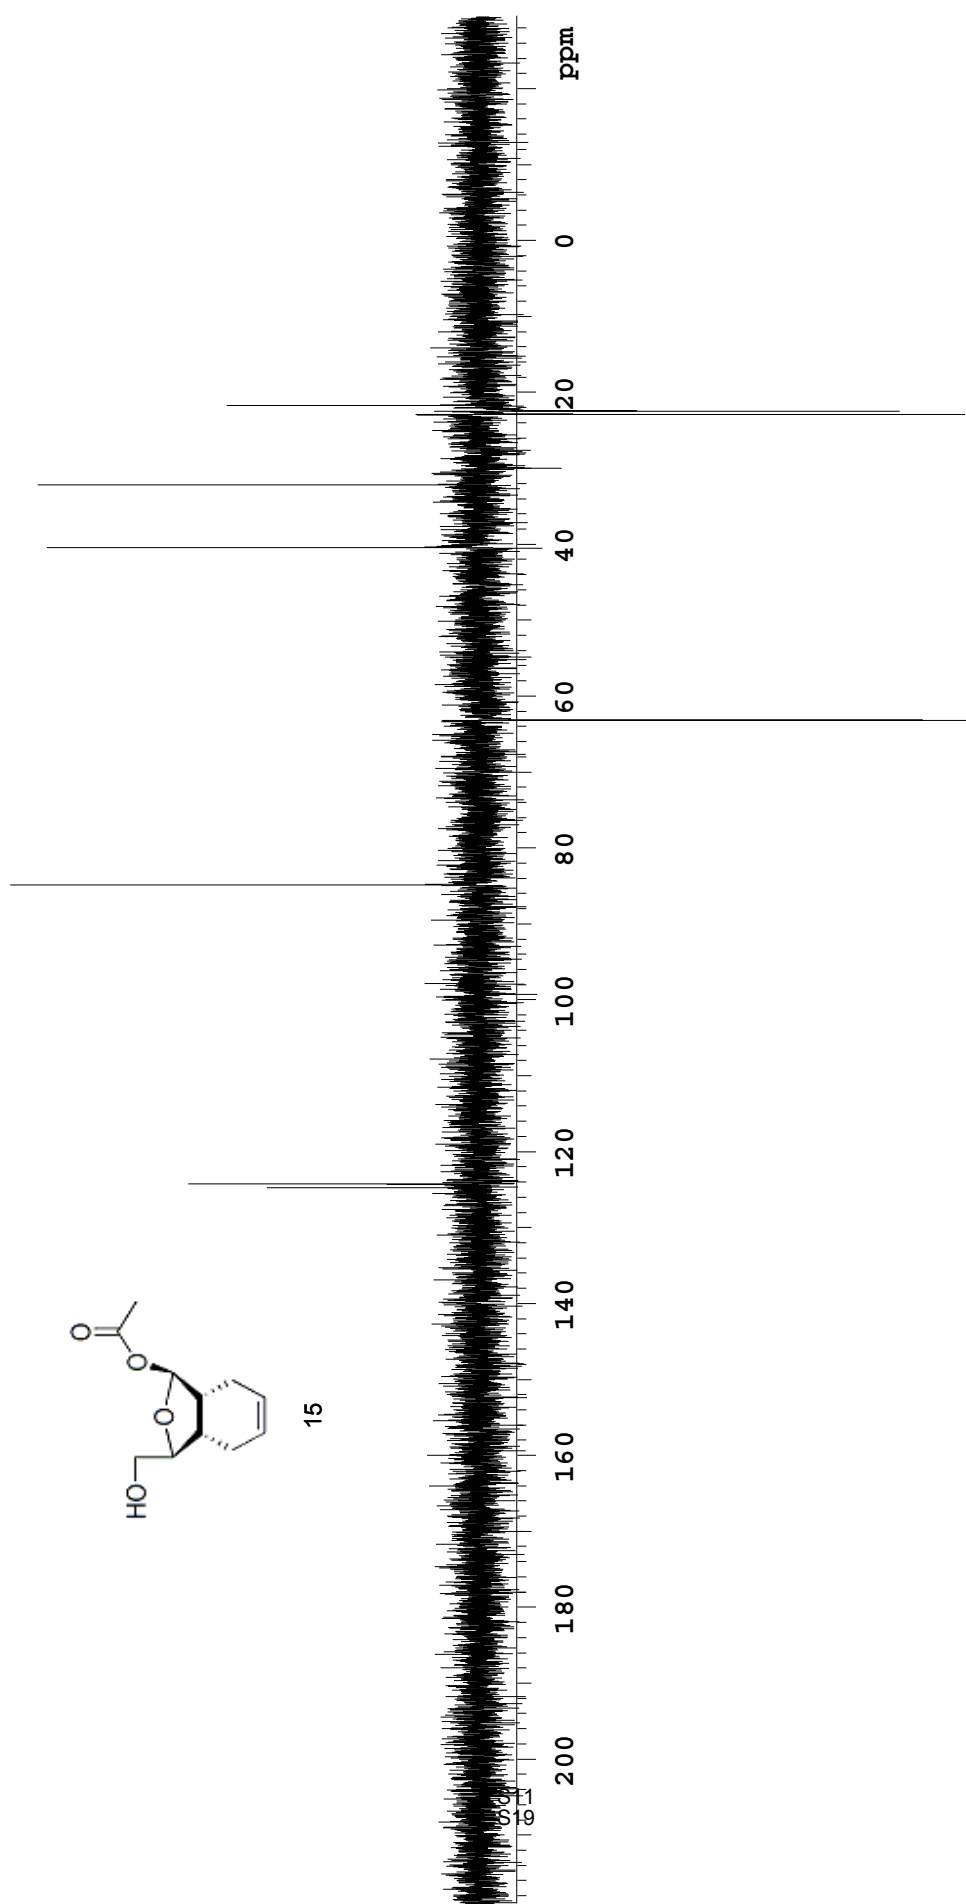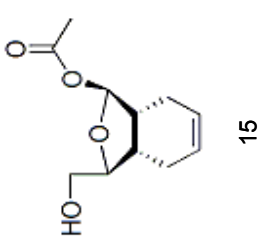

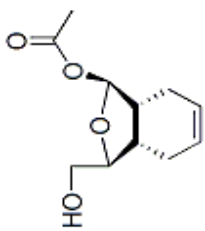

15

S20

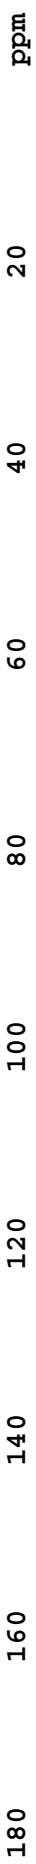

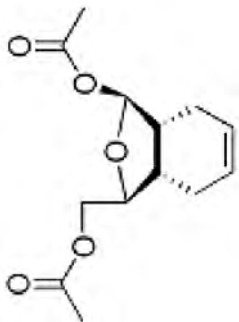

16

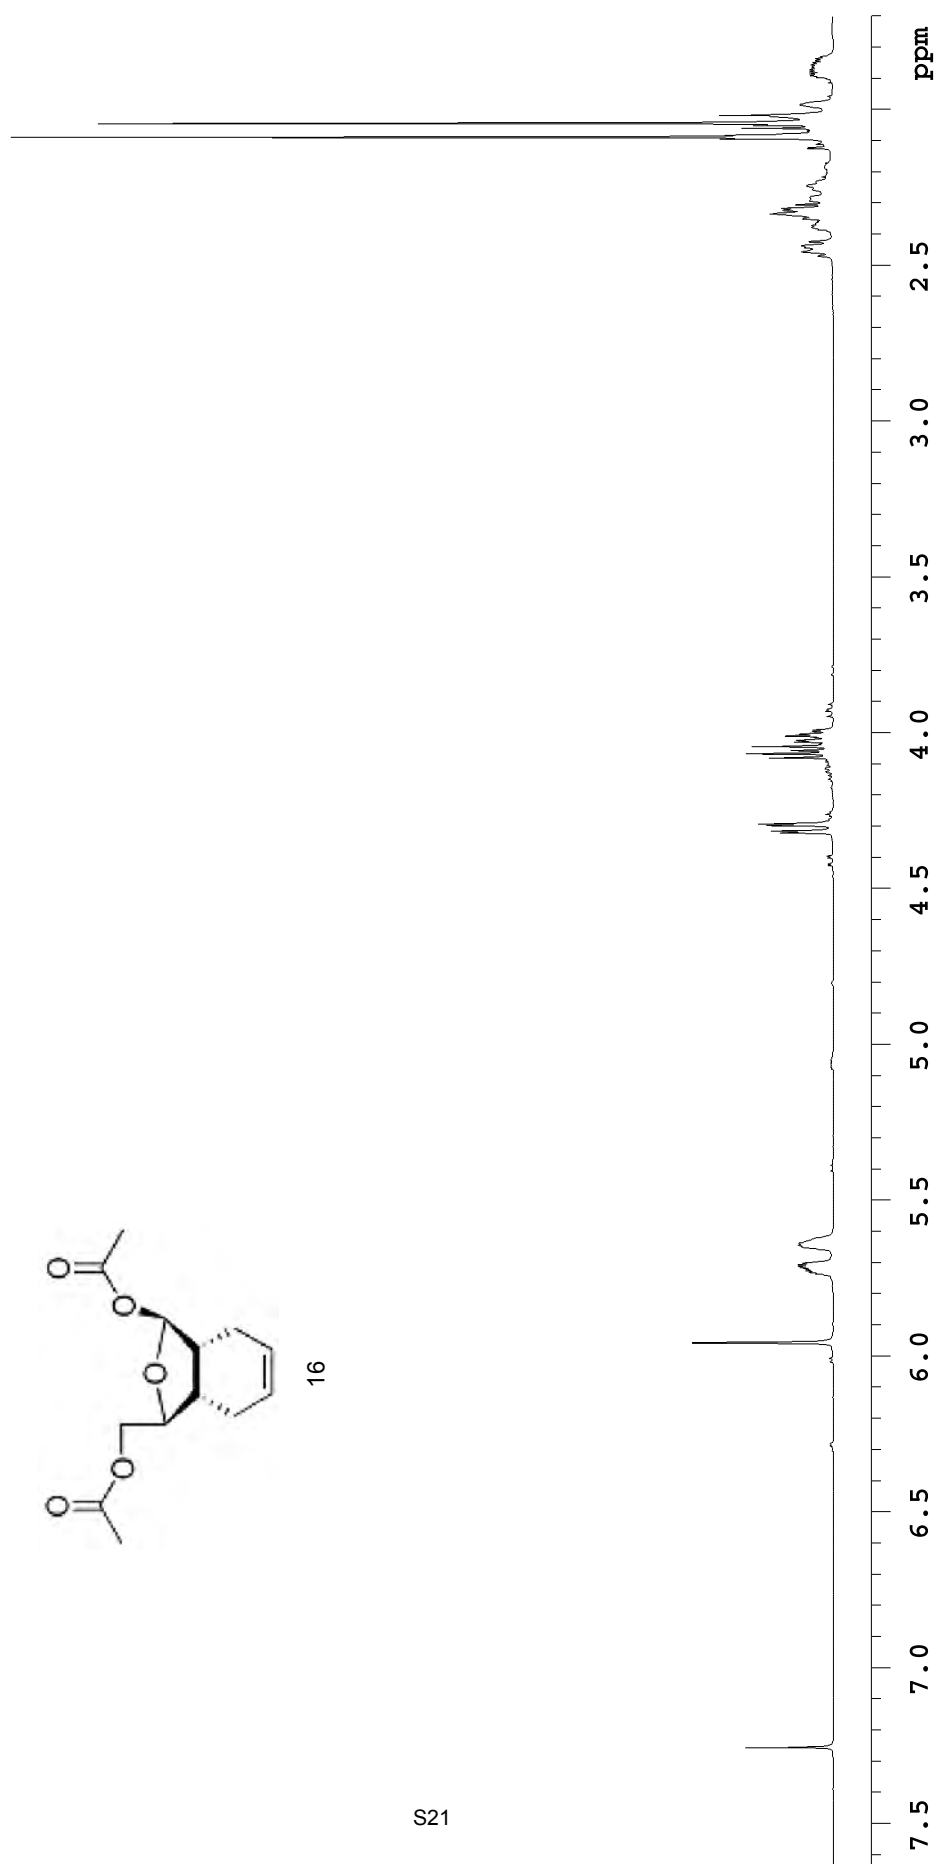

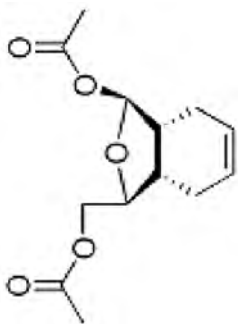

16

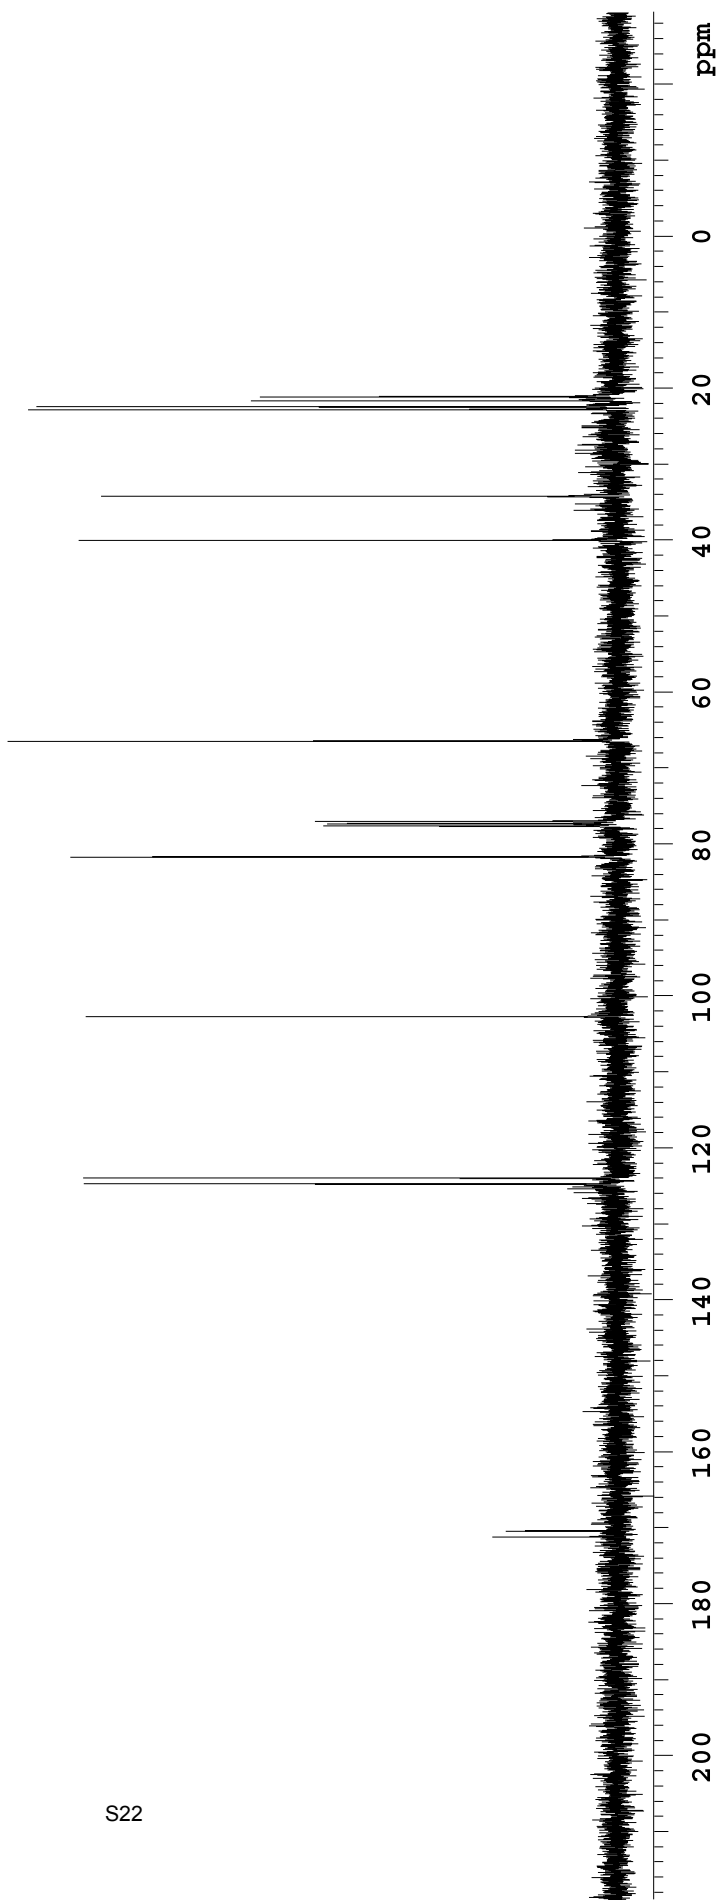

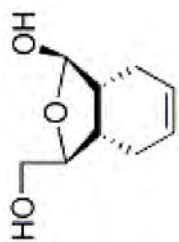

17

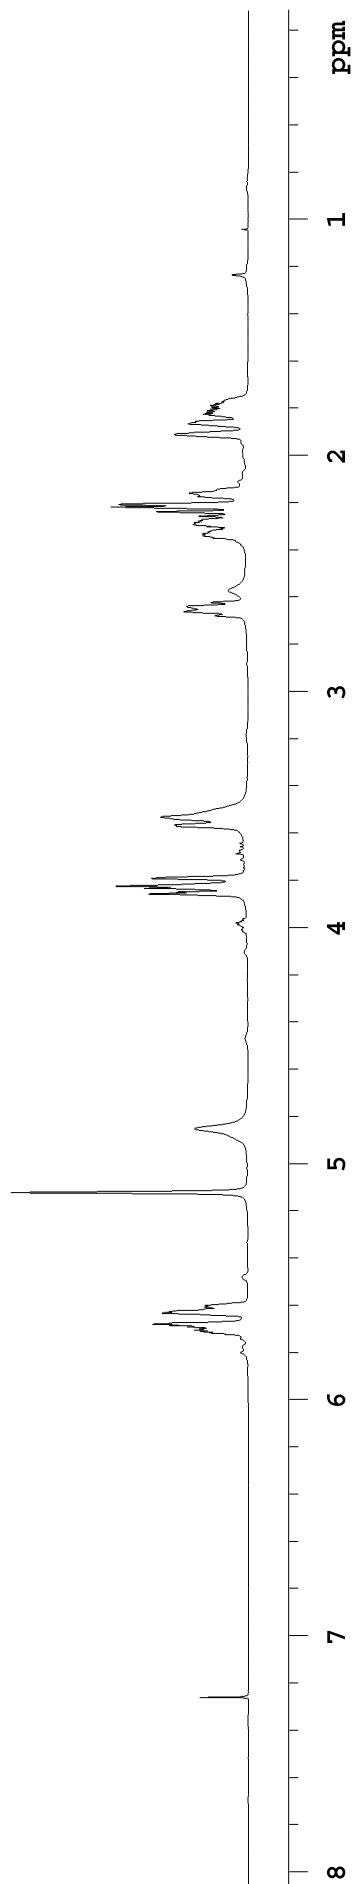

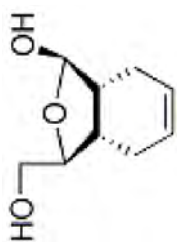

17

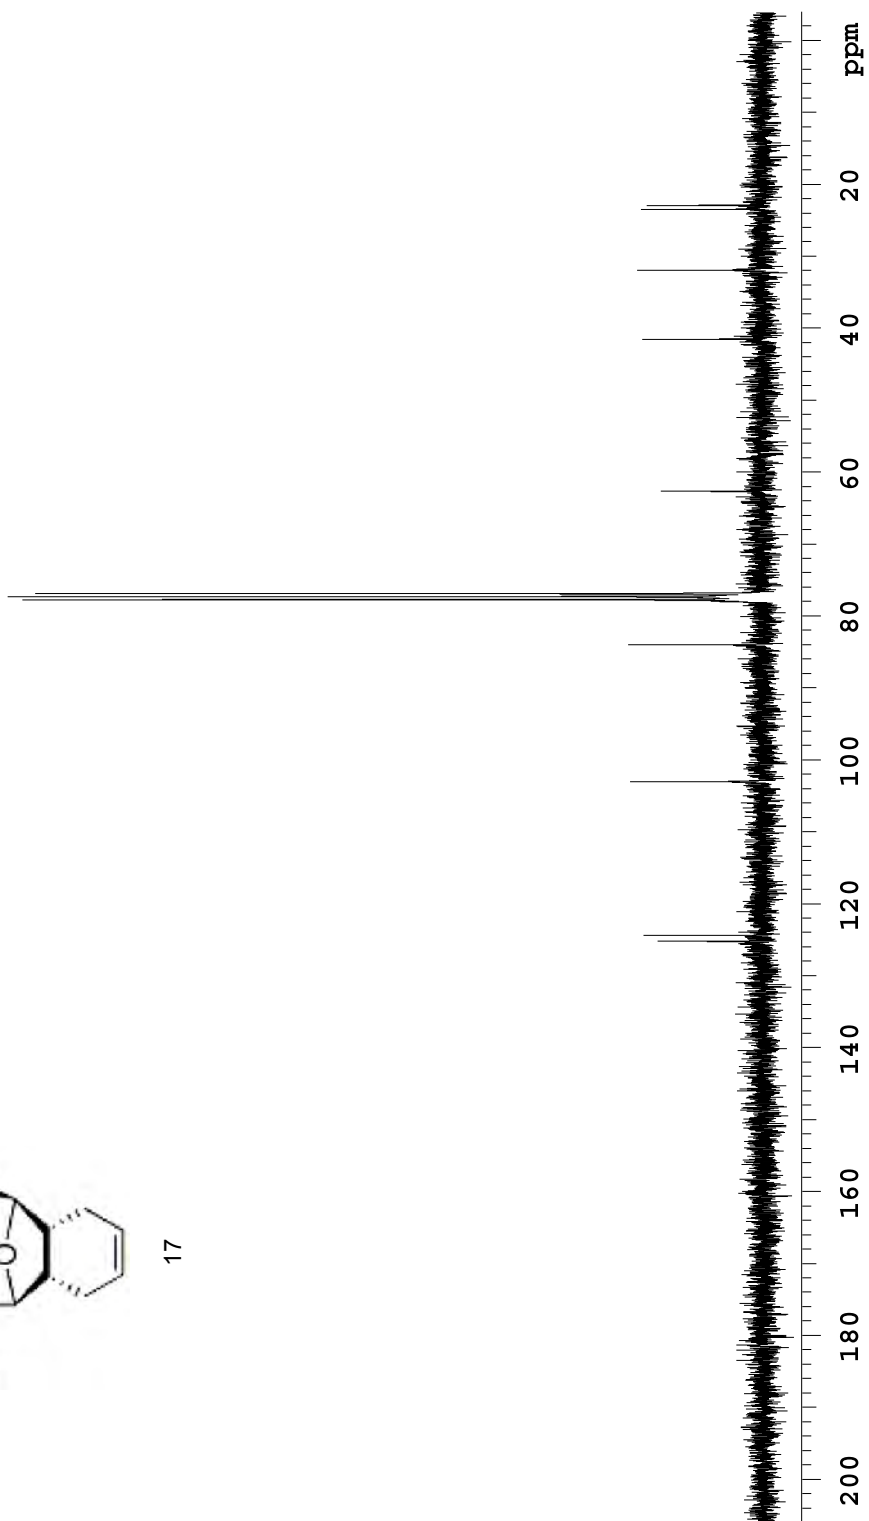



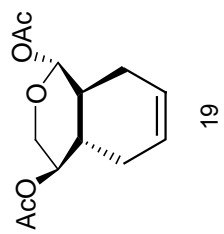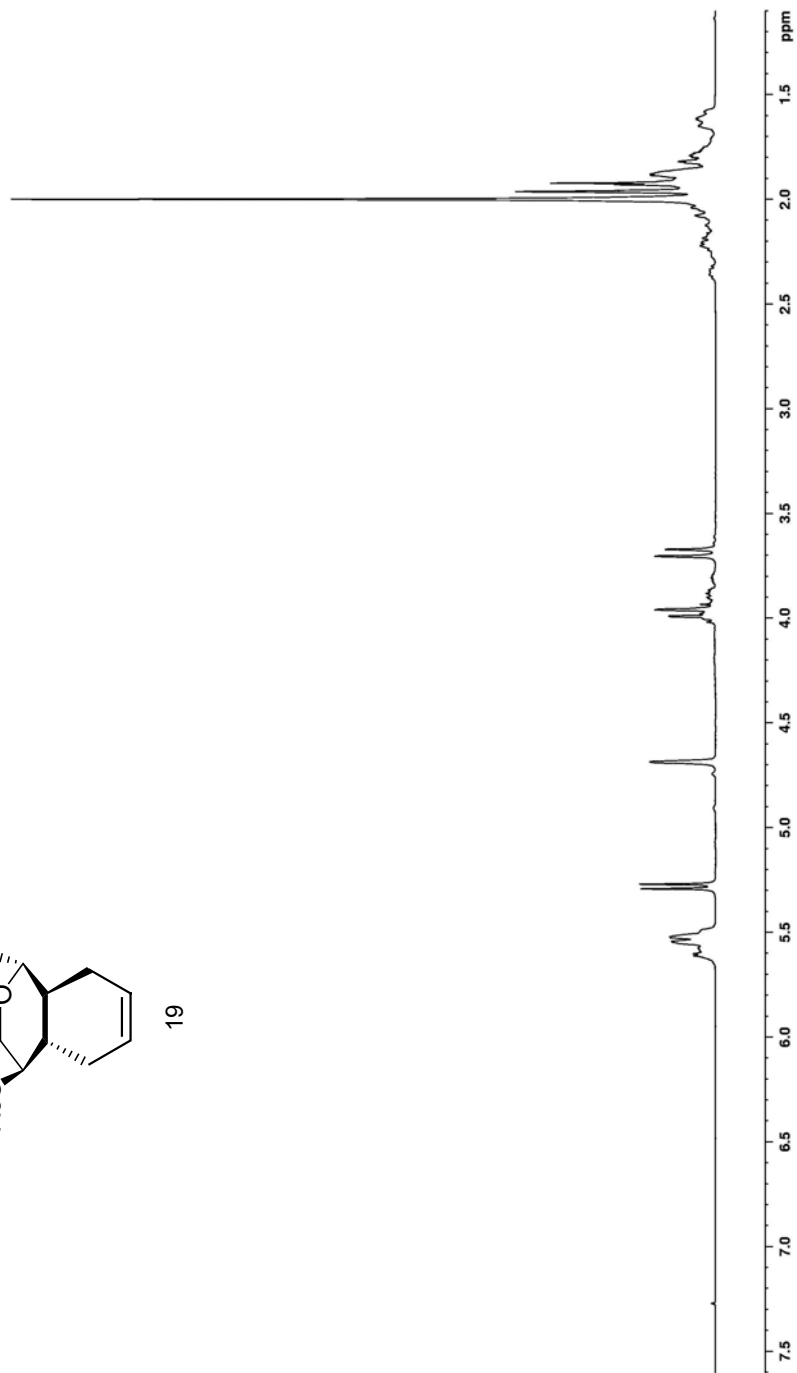

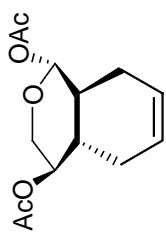

19

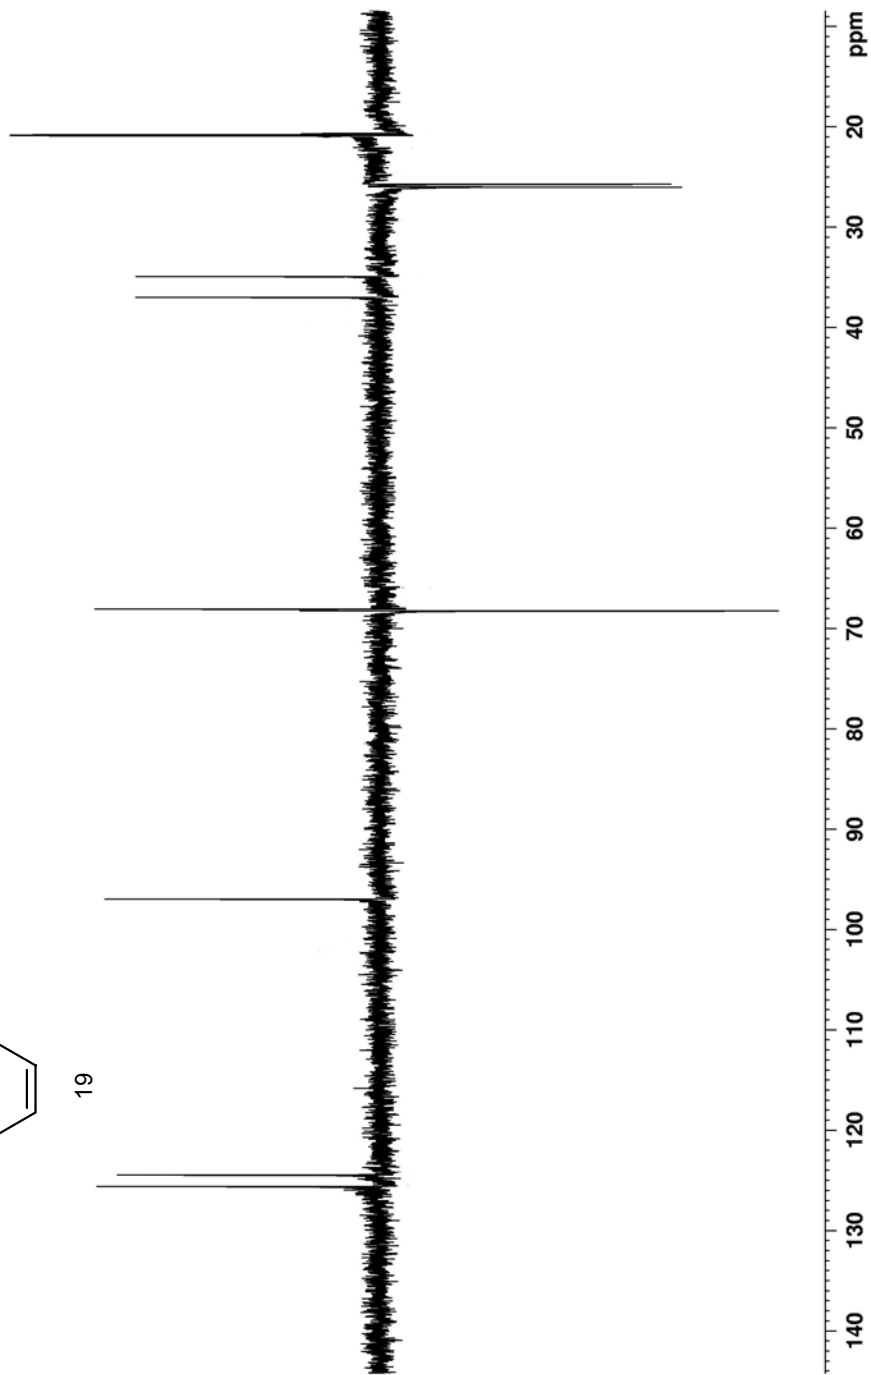

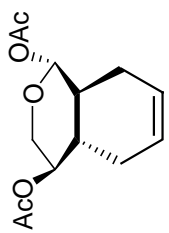

19

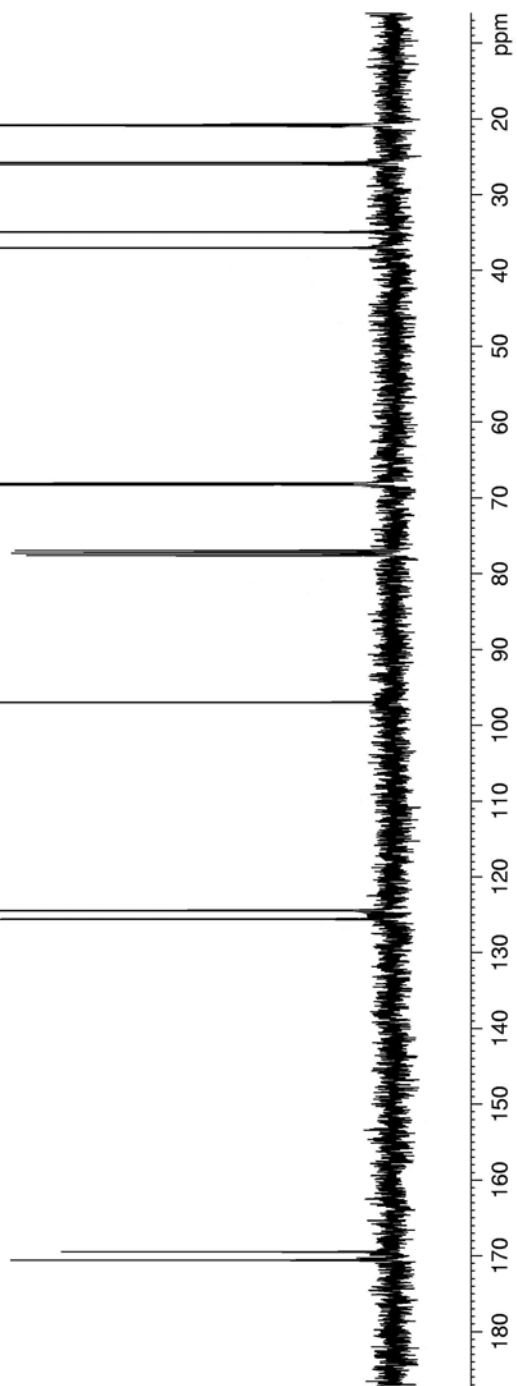

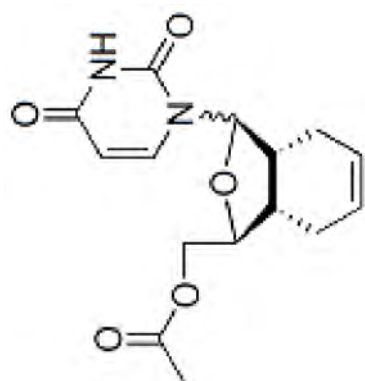

20a+21a

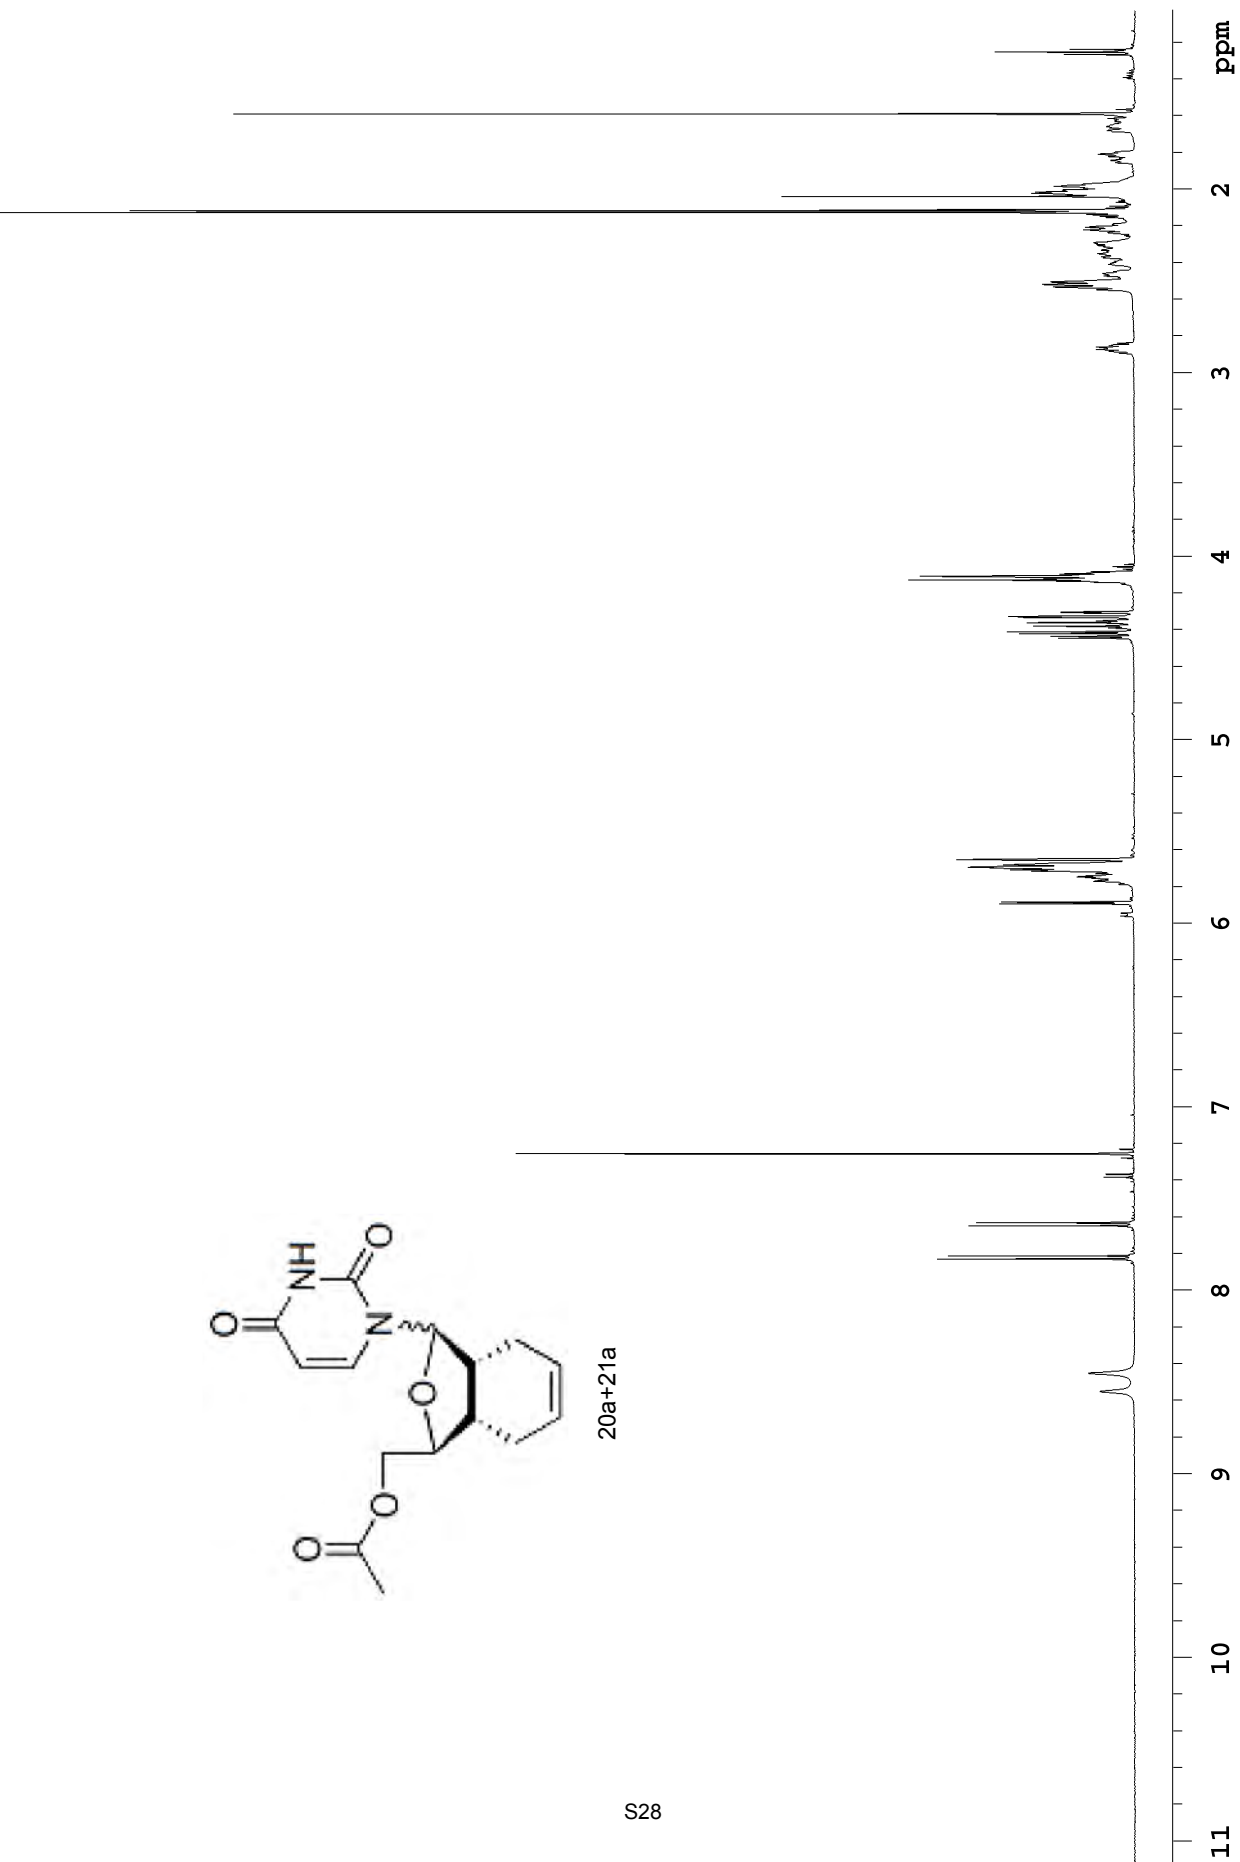

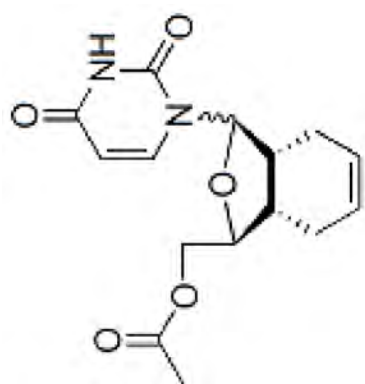

20a+21a

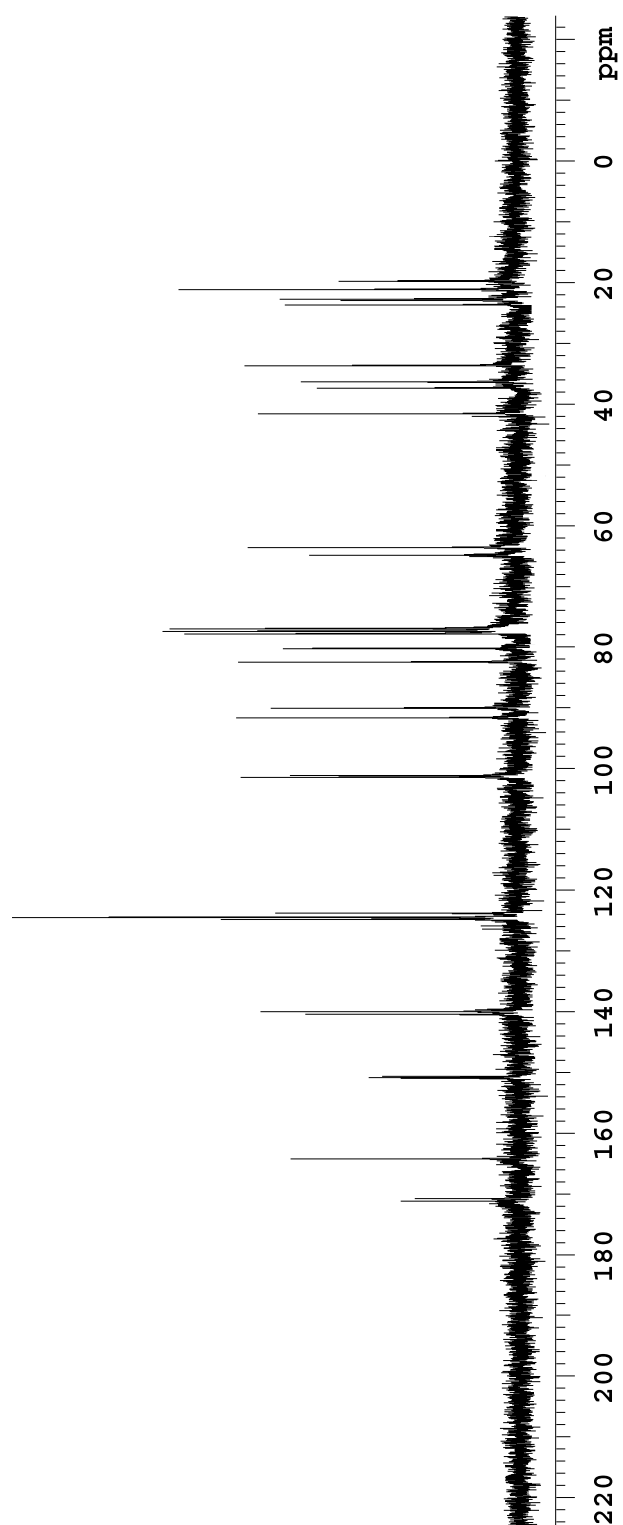

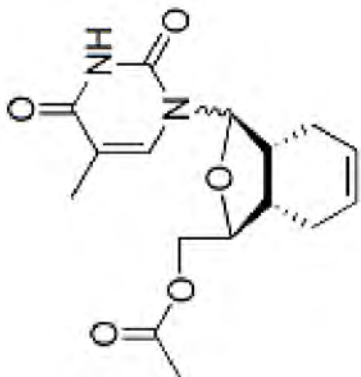

20b+21b

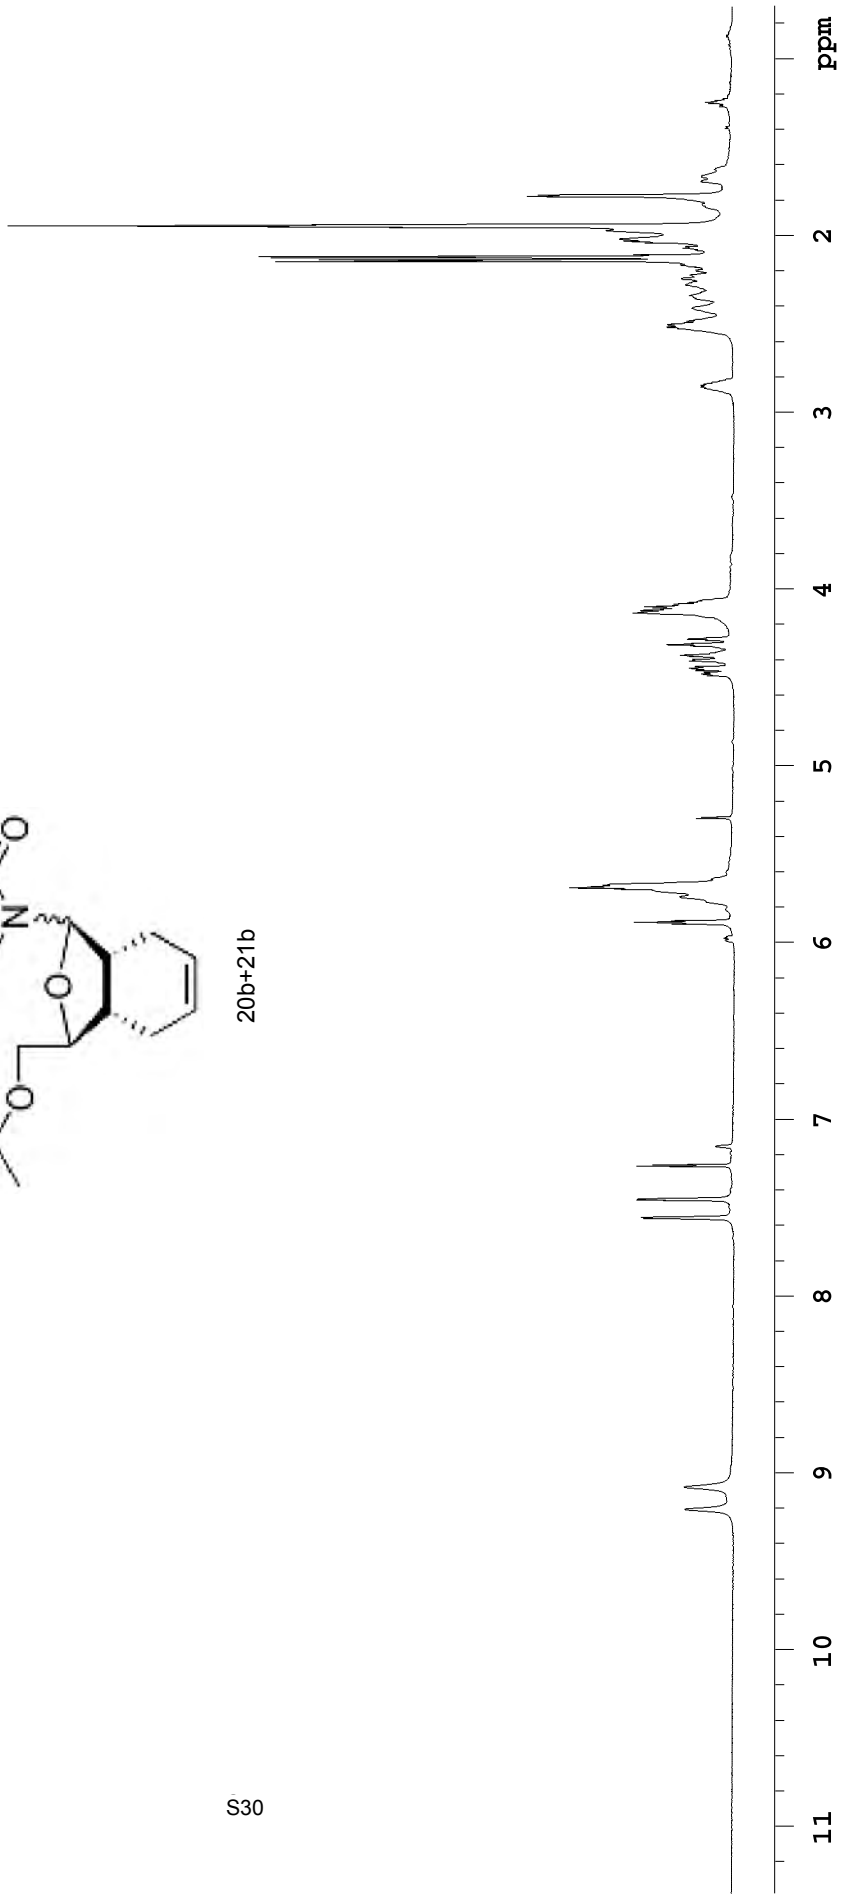

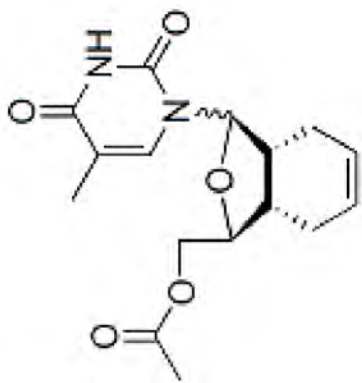

20b+21b

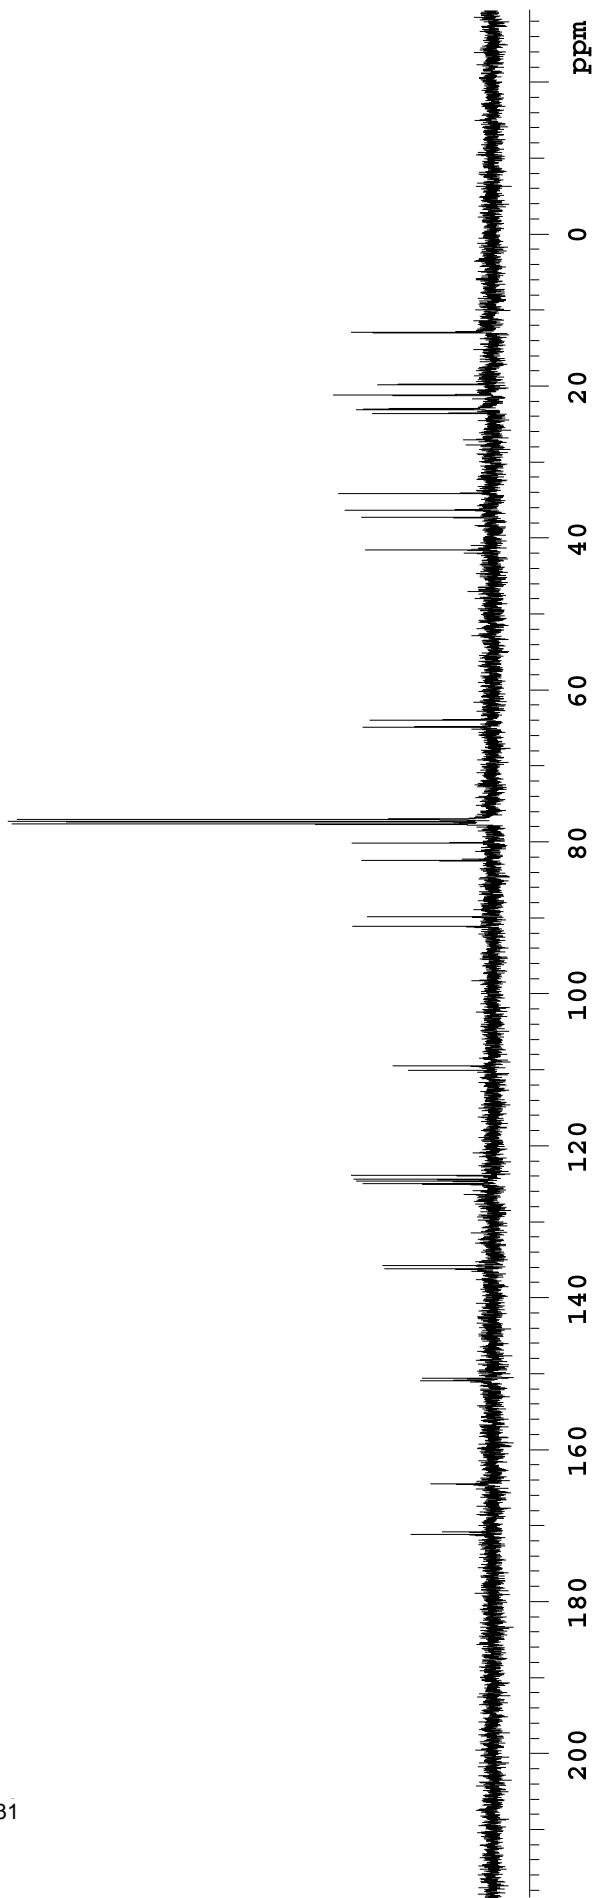

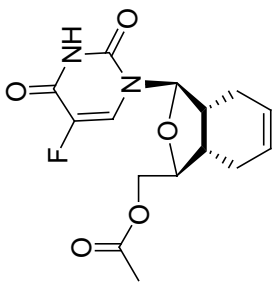

20c

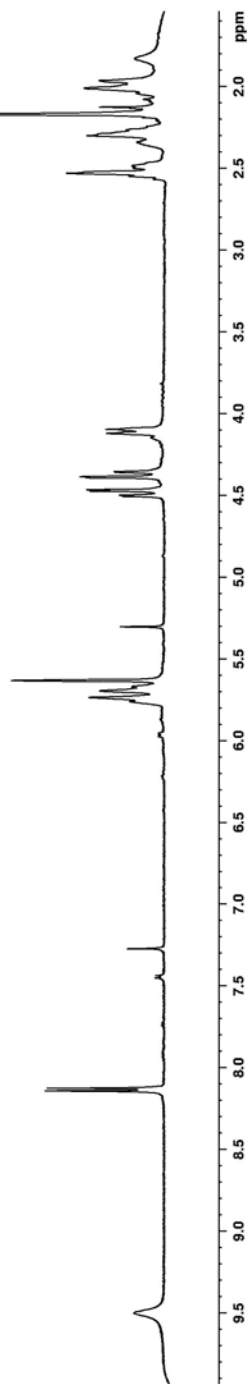



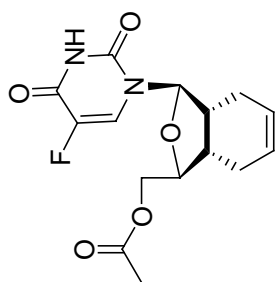

20c

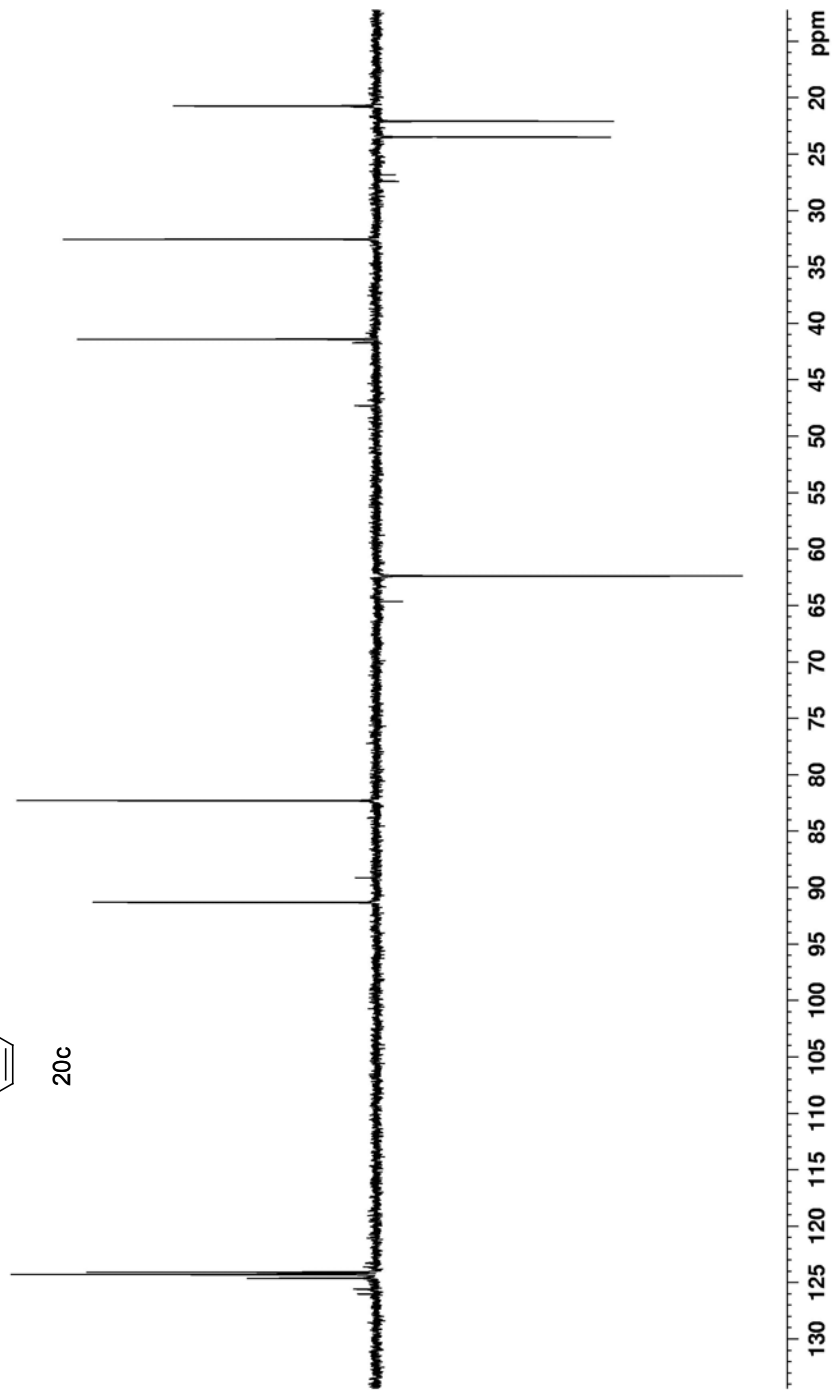

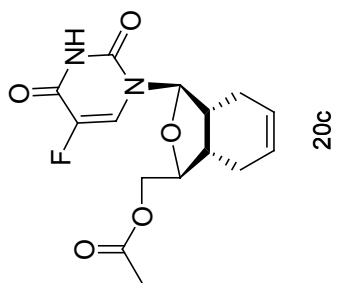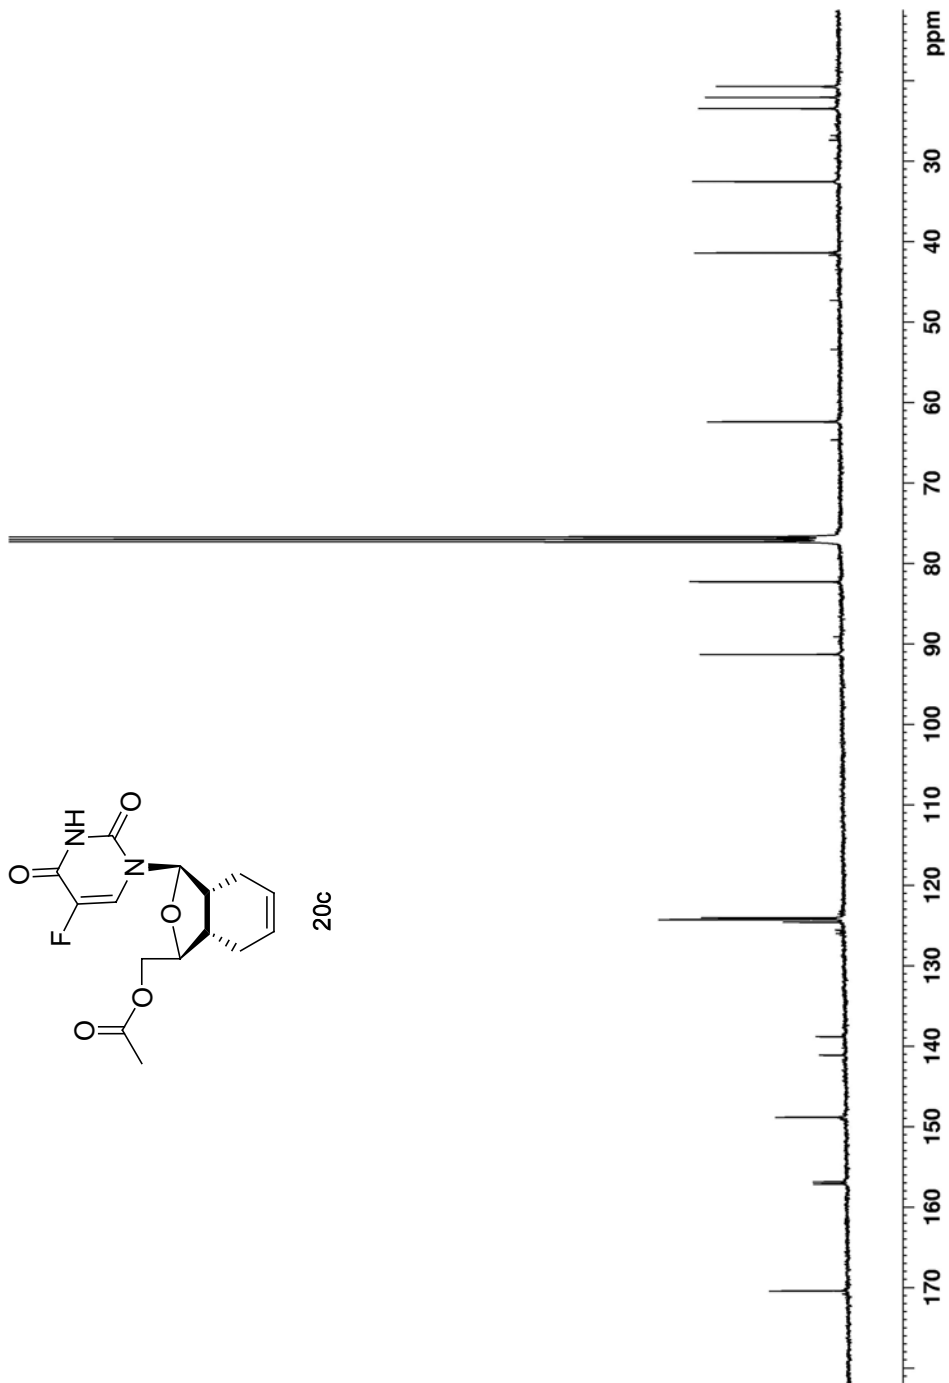

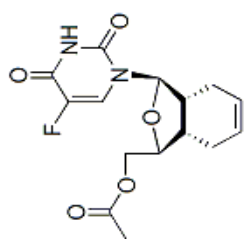

20c

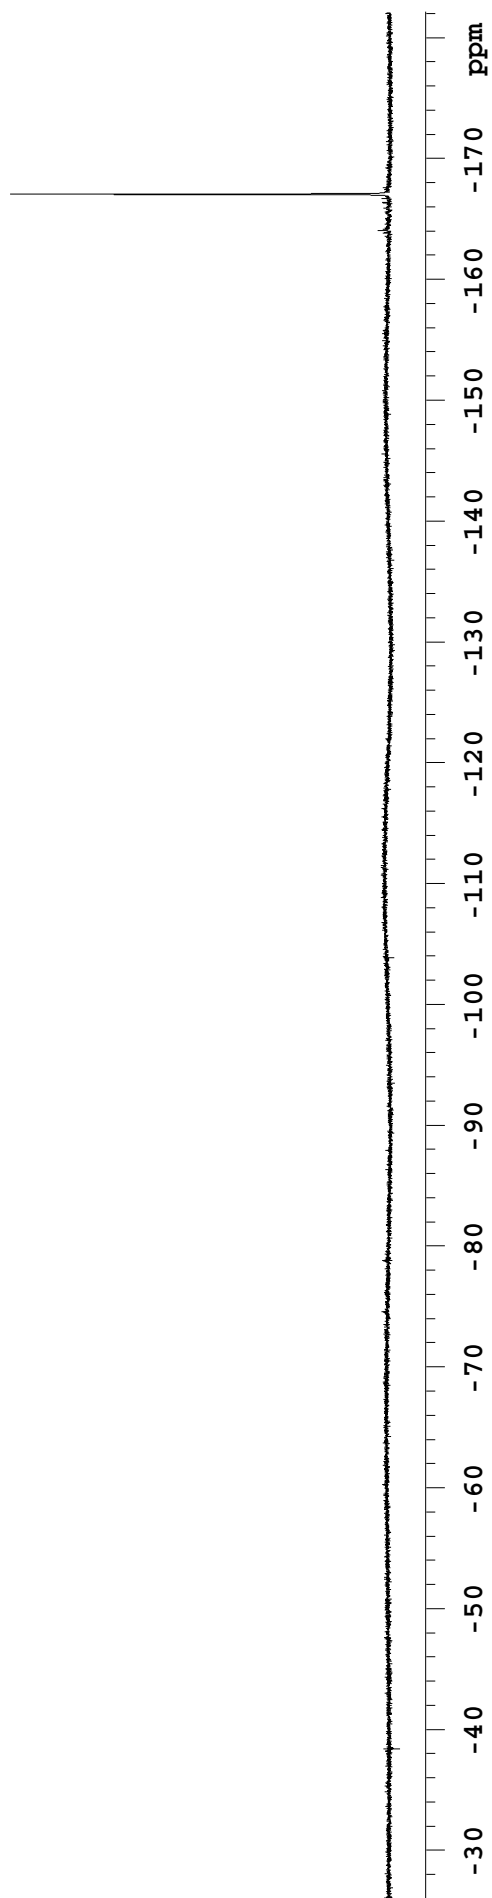

COSY

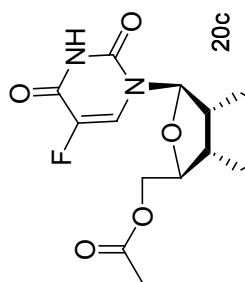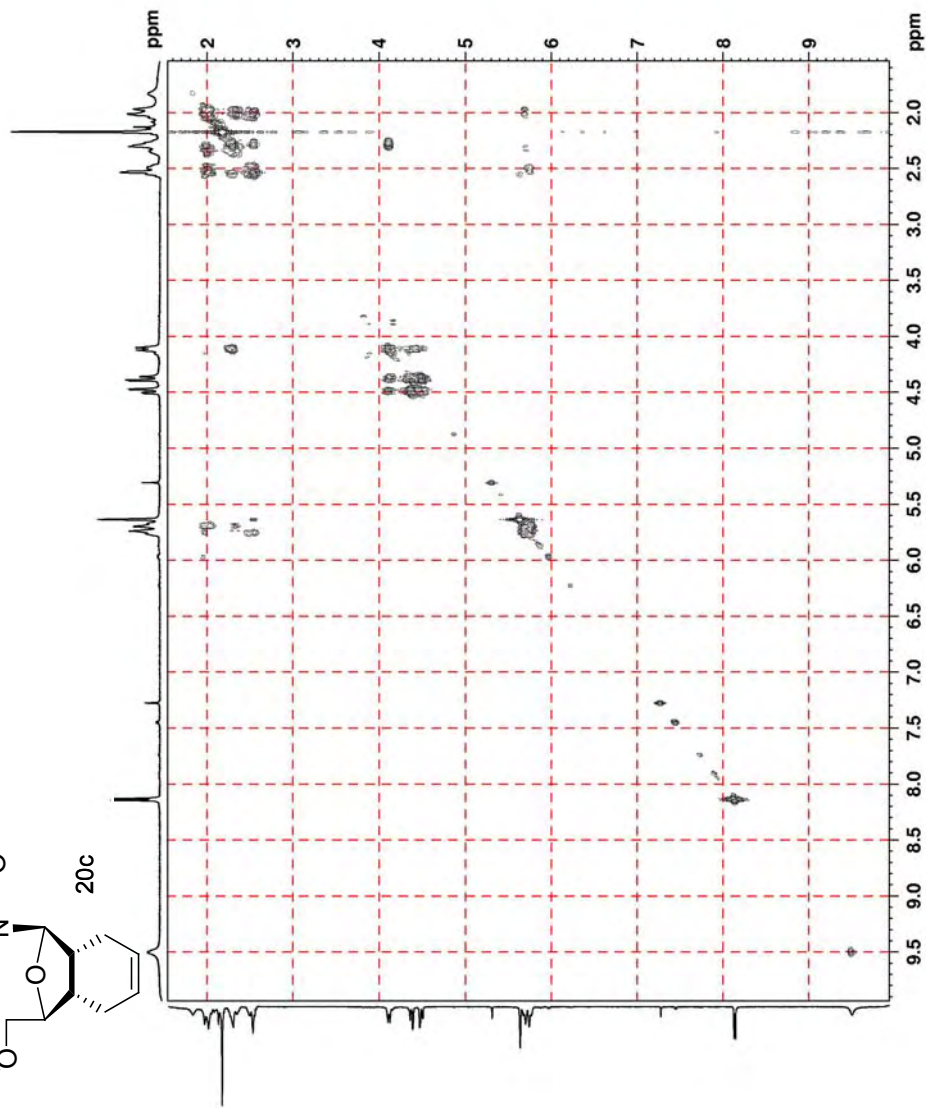

HSQC

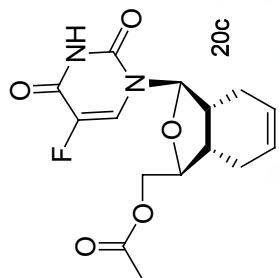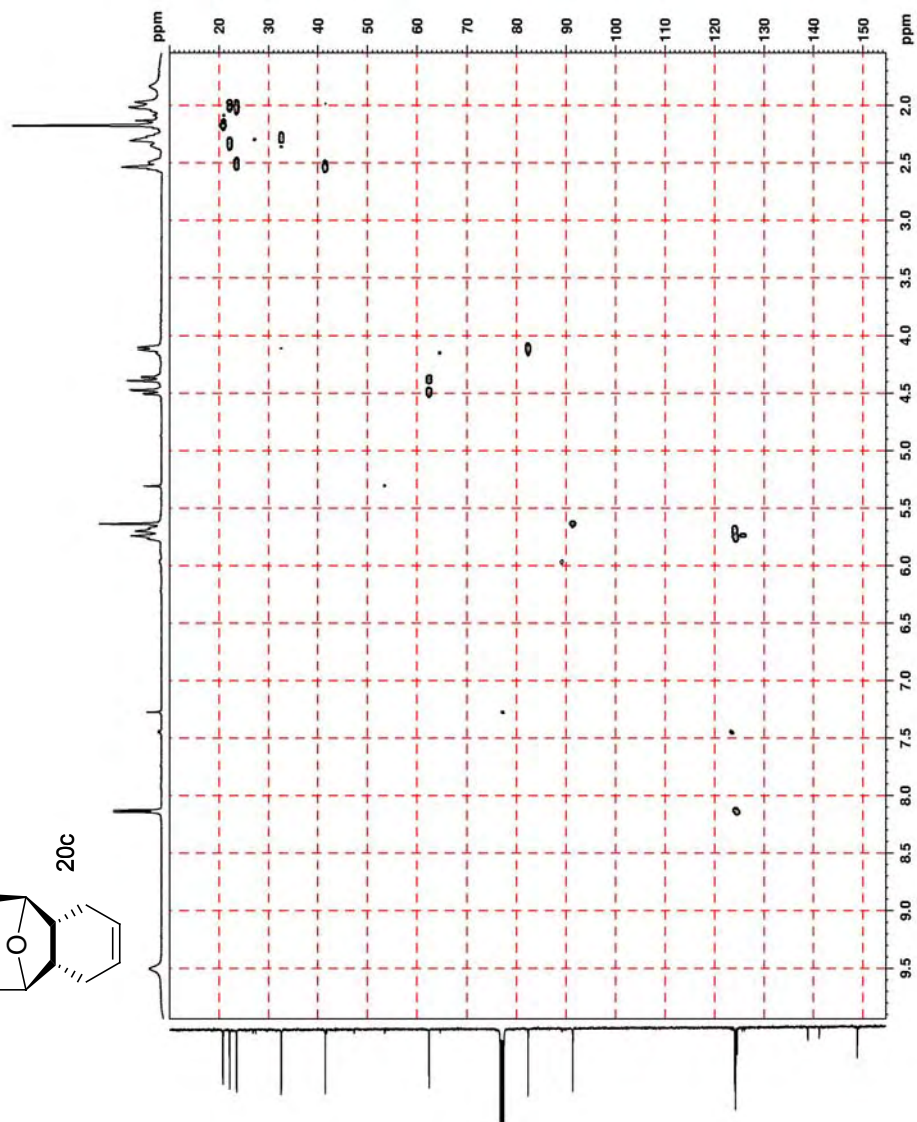

HMBC

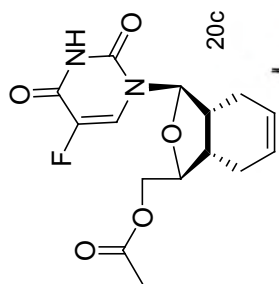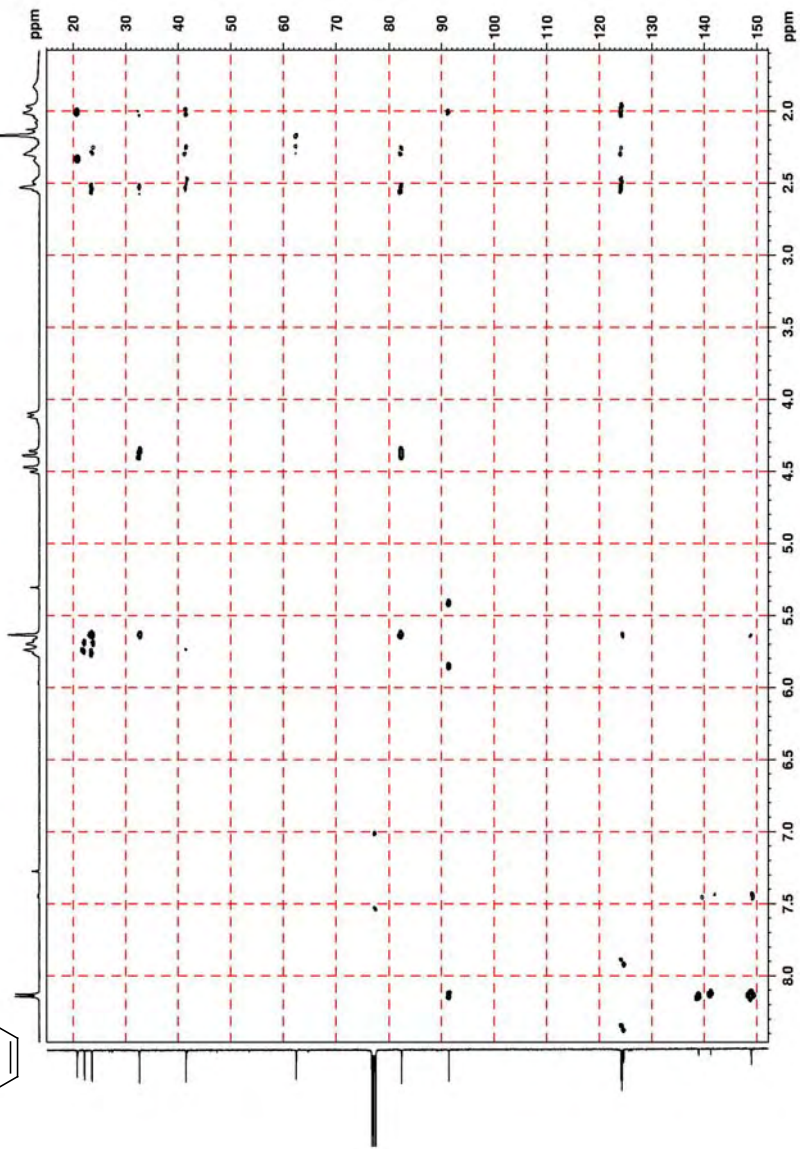

NOESY

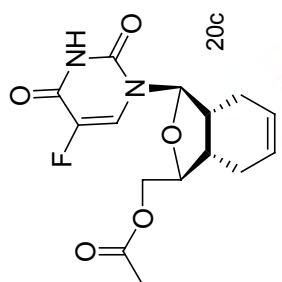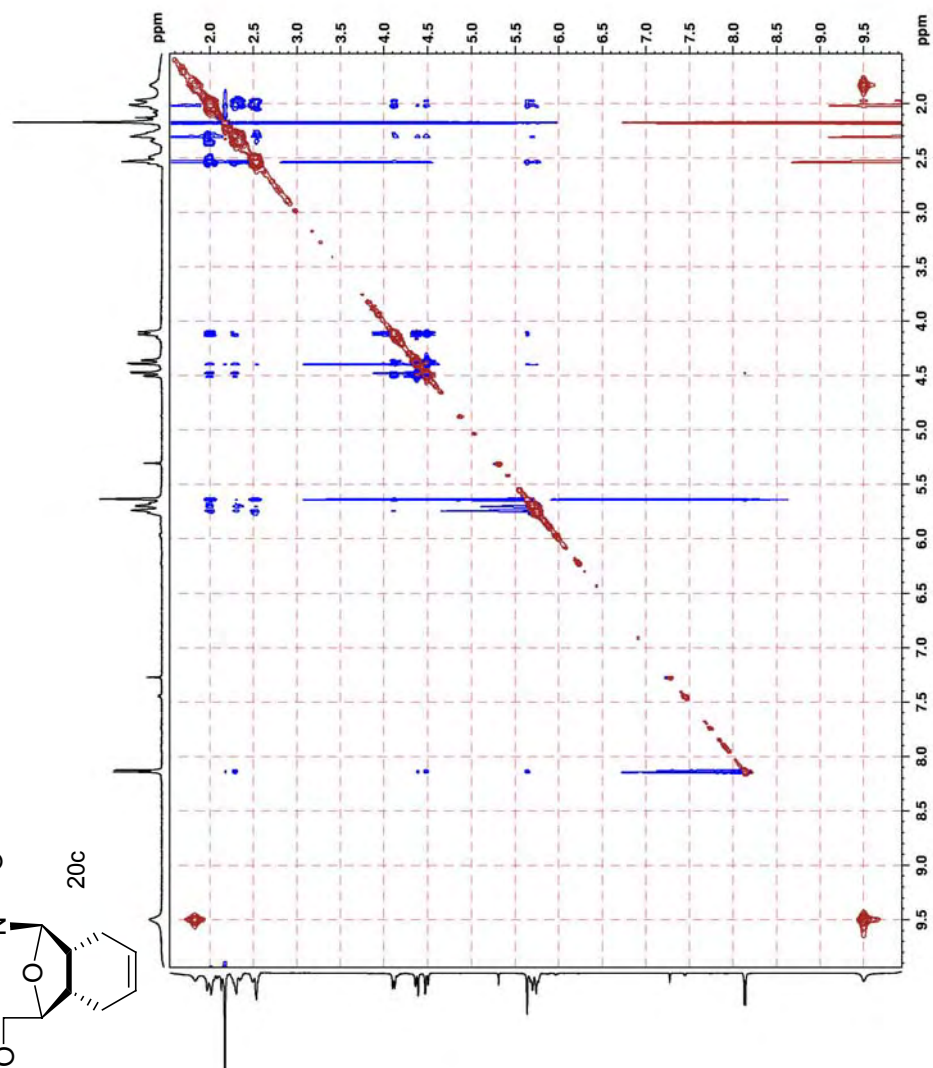

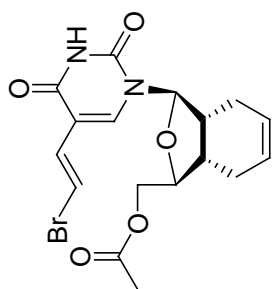

20d

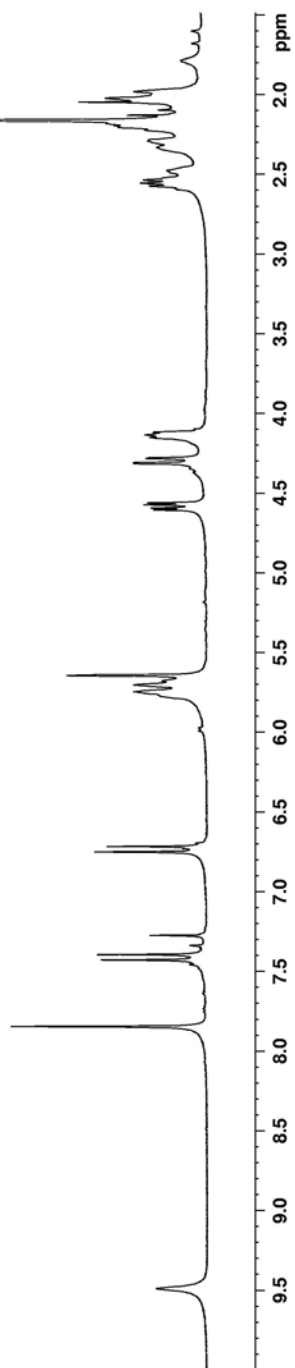



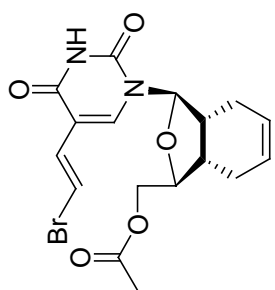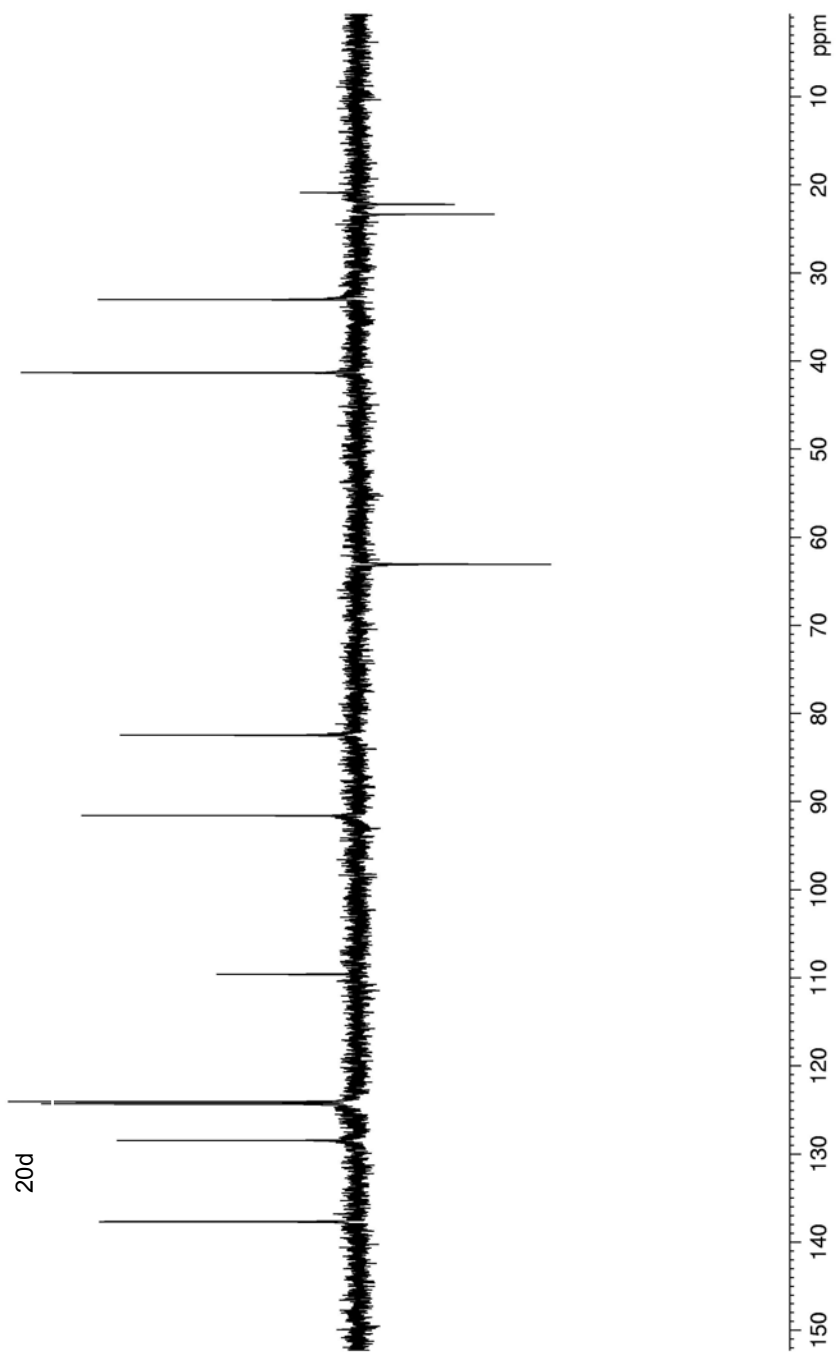

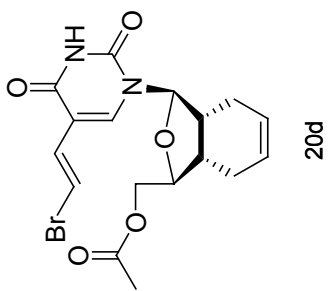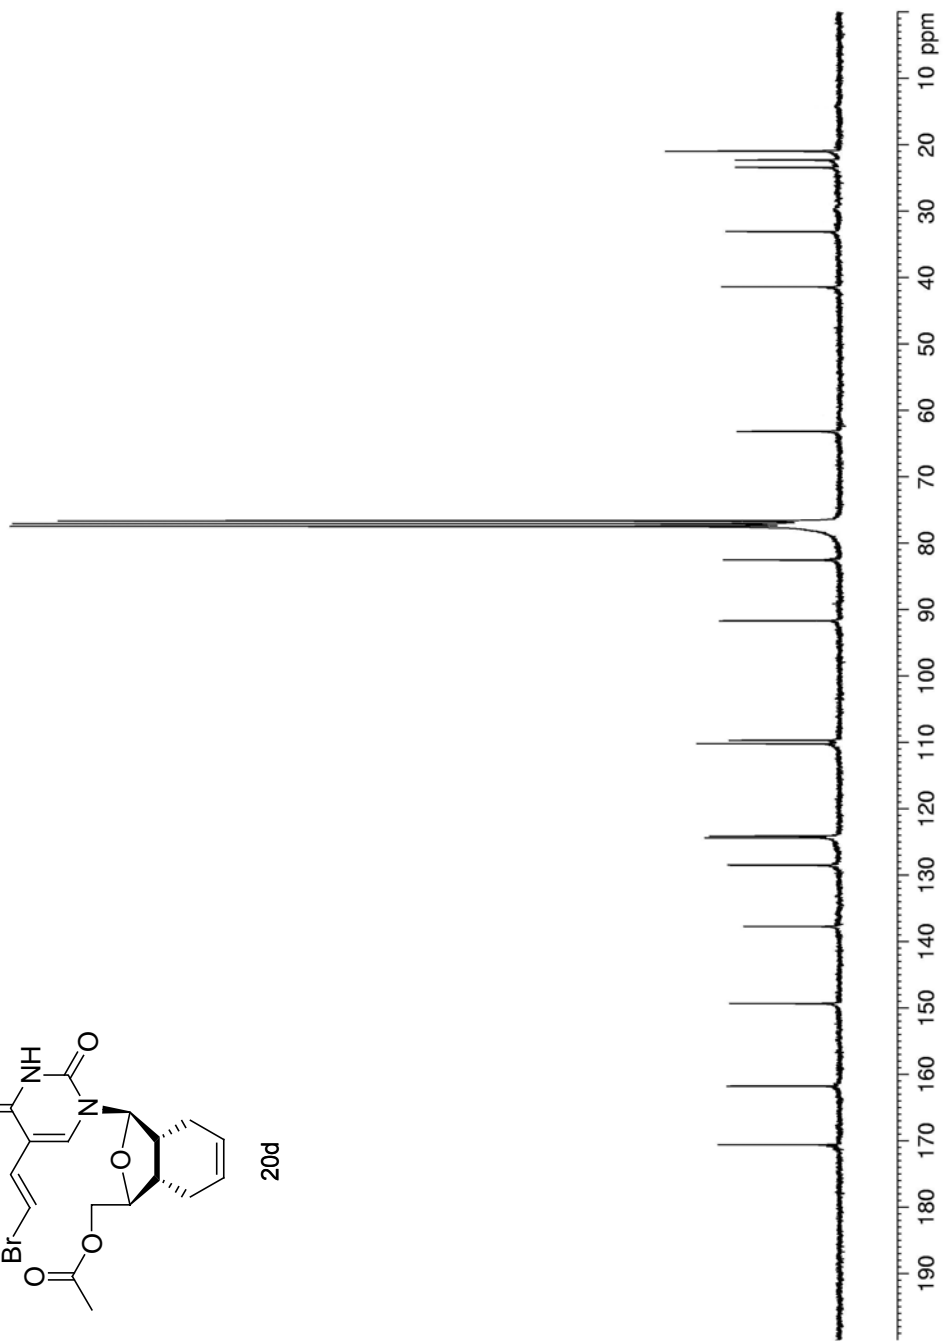



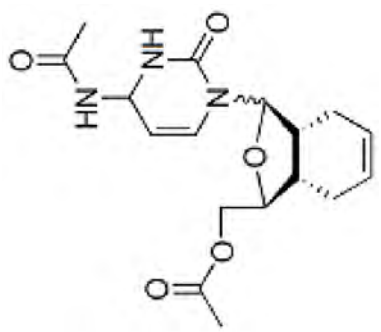

20e+21e

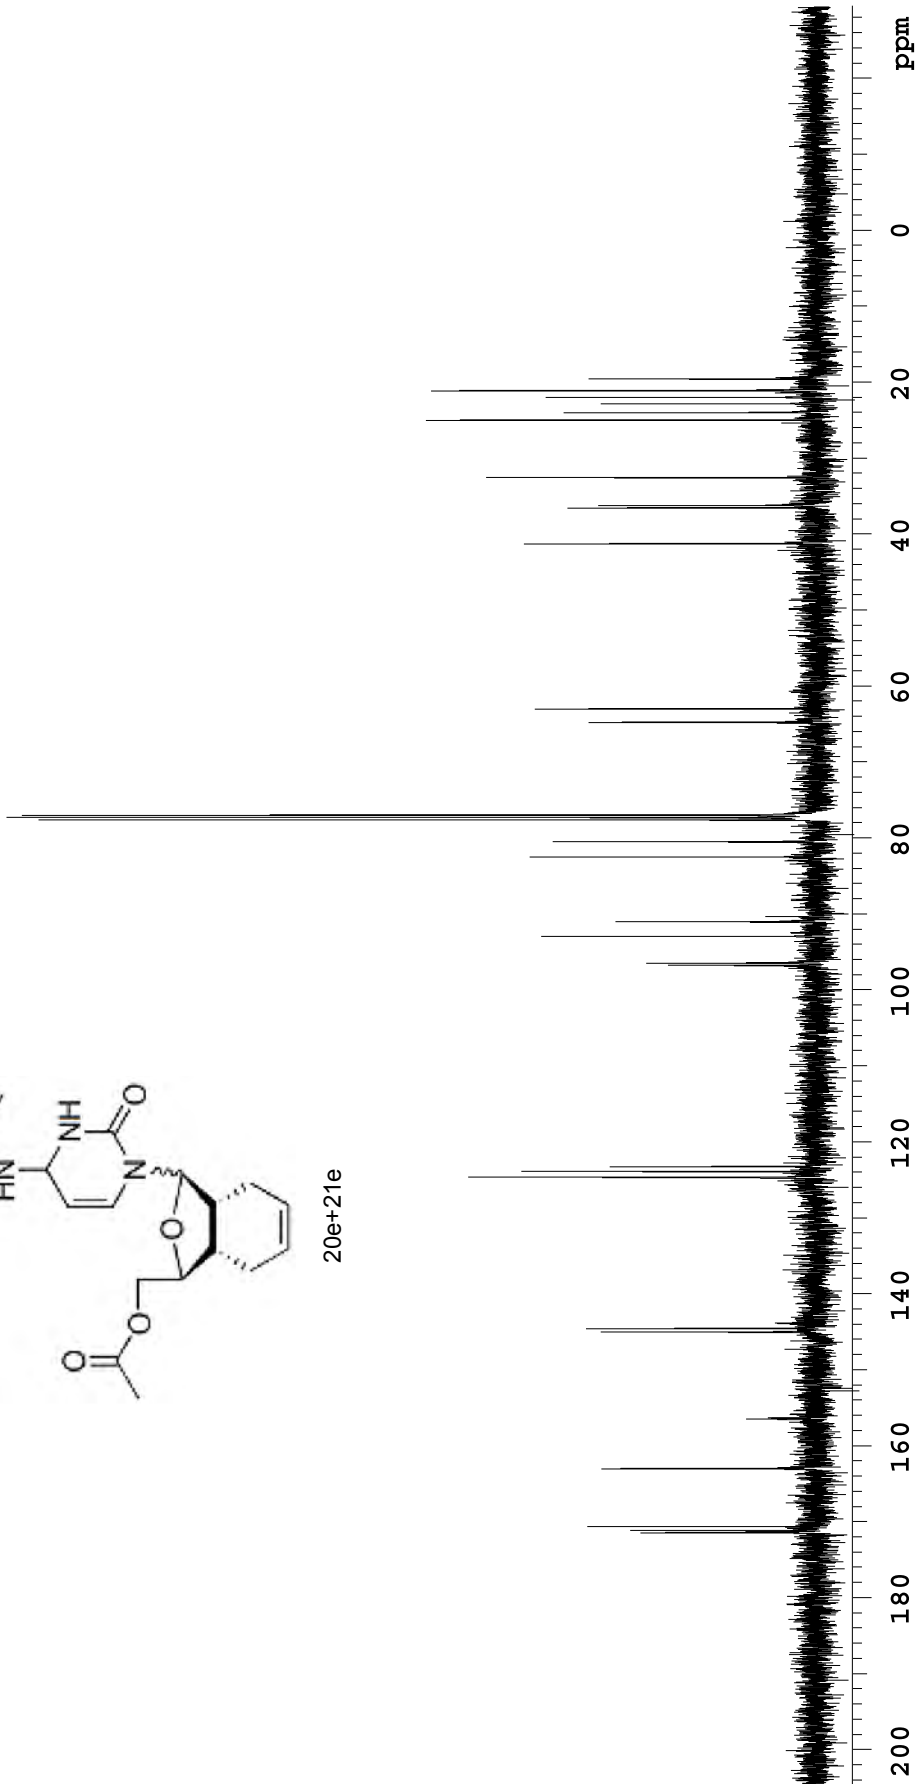

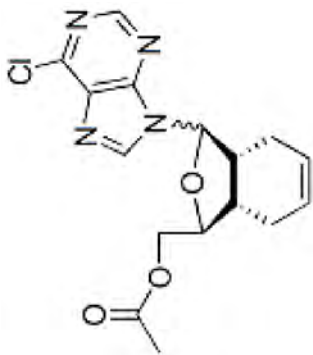

20f+21f

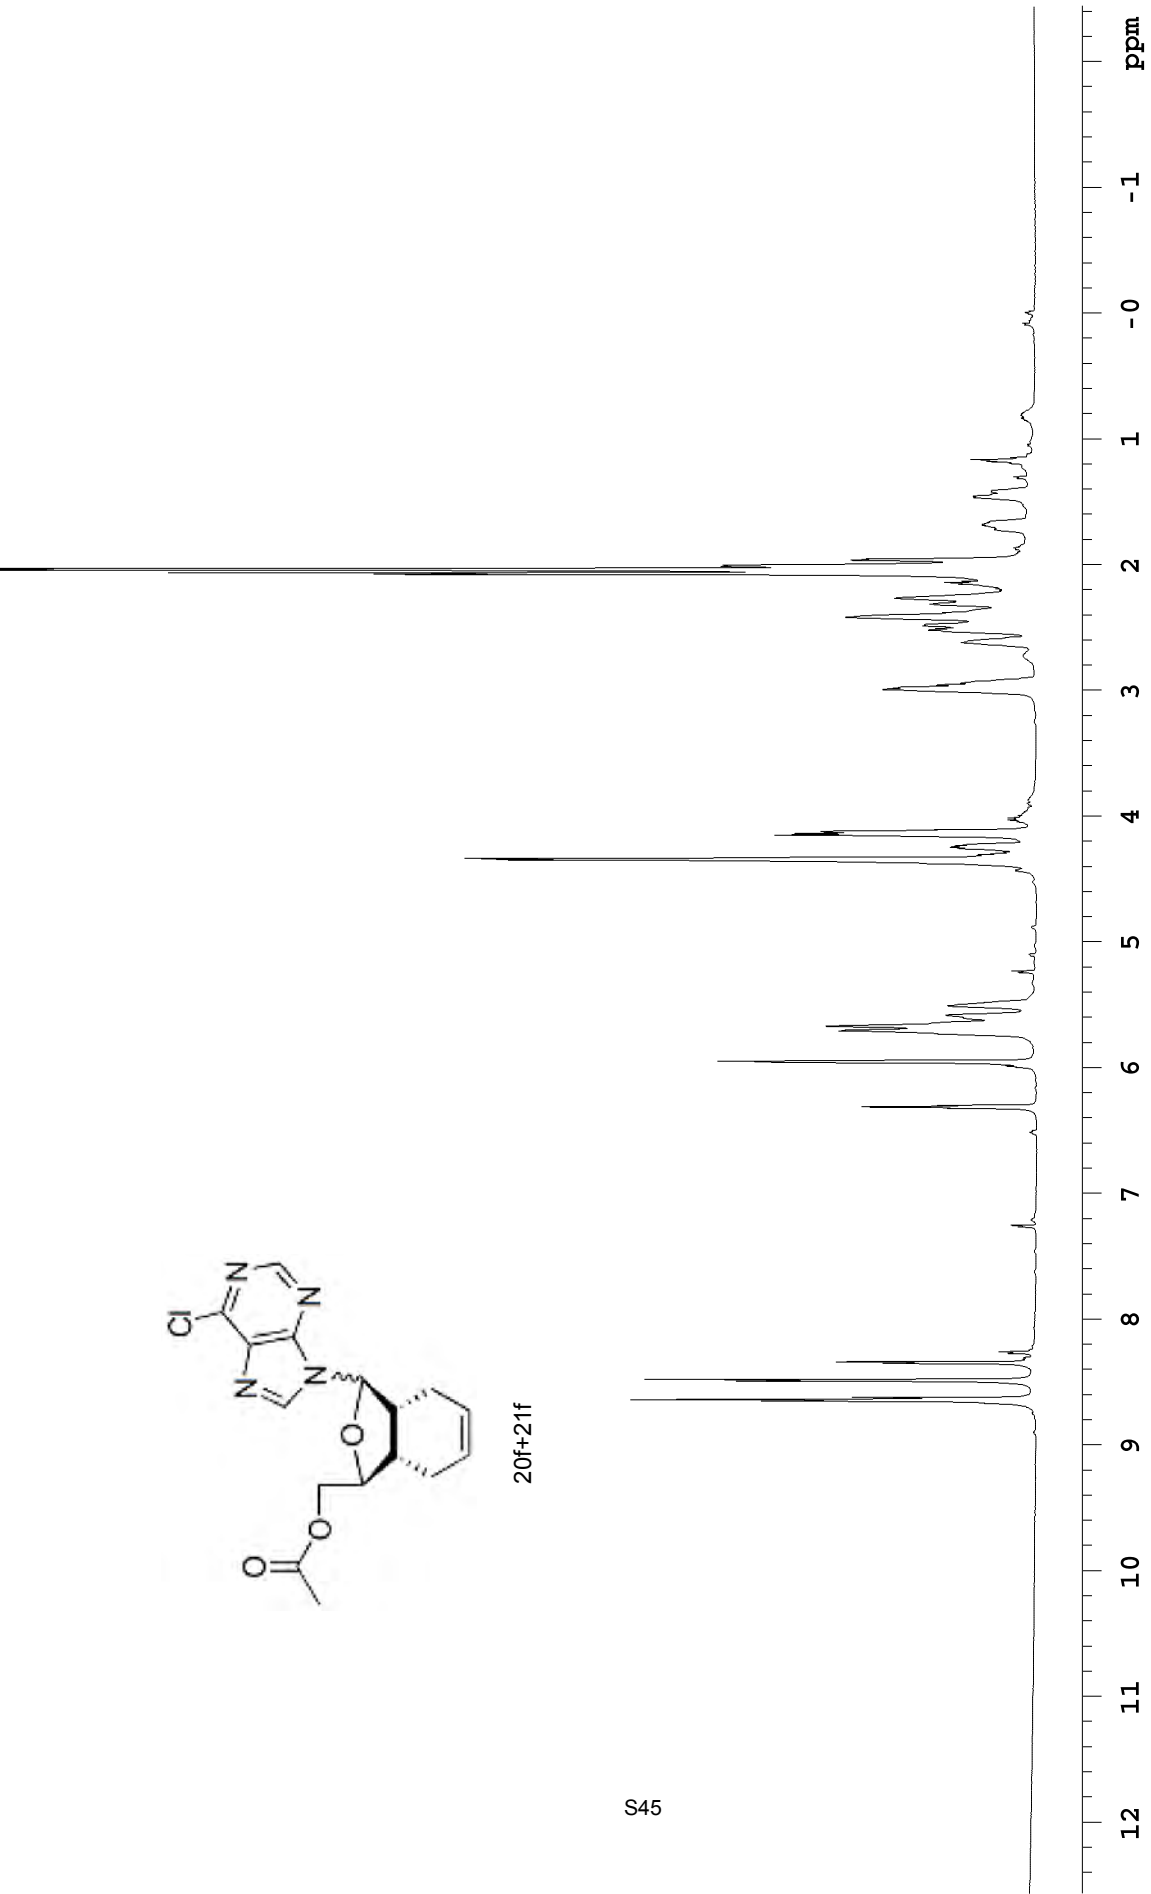

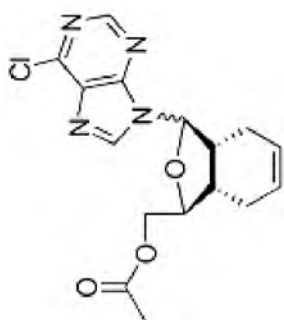

20f+21f

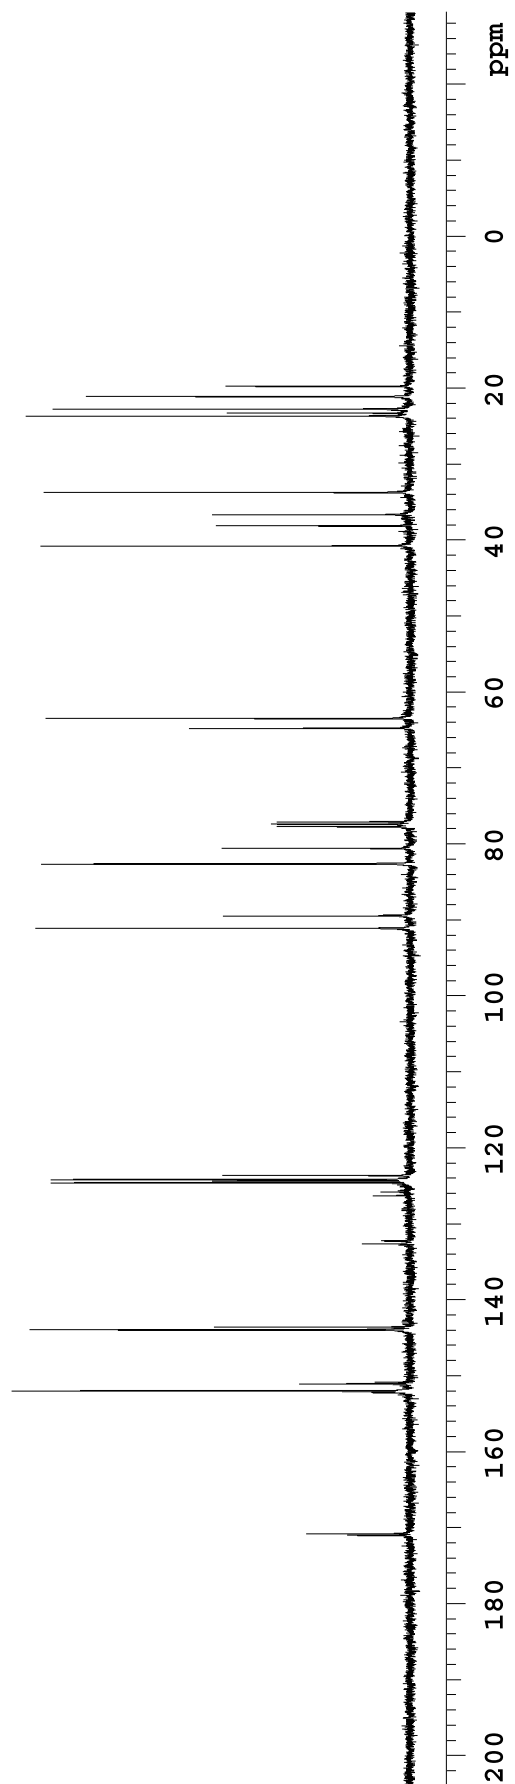

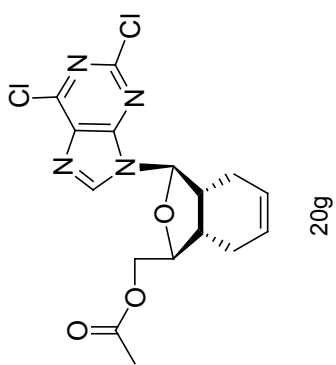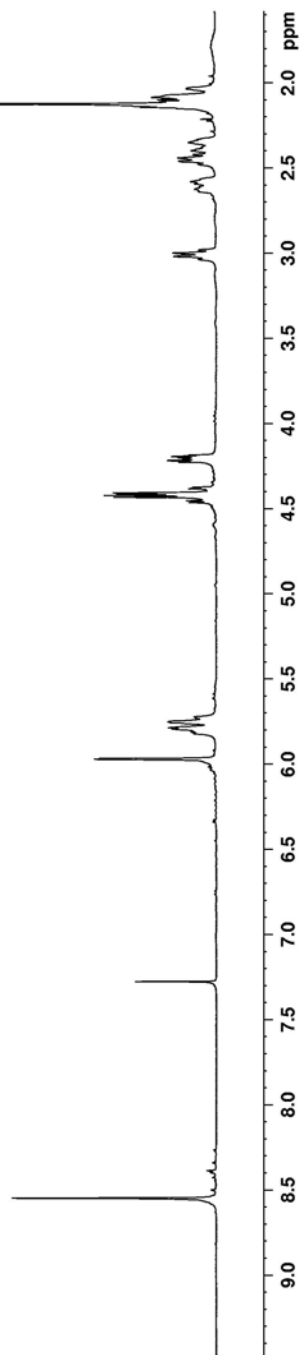

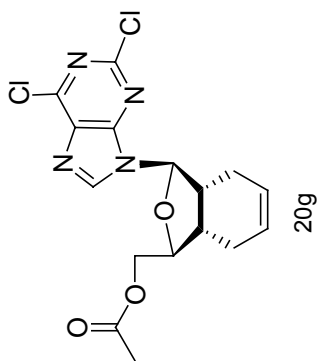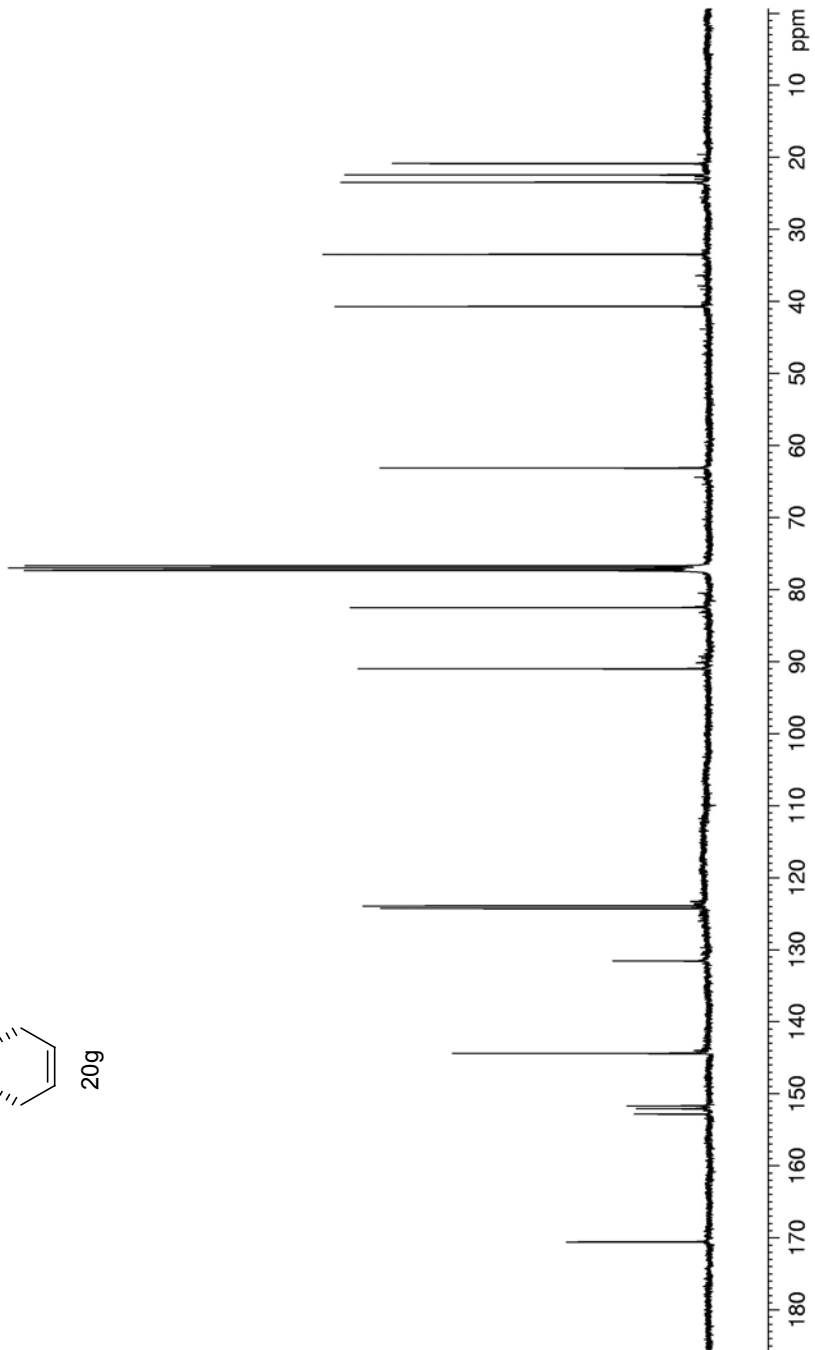



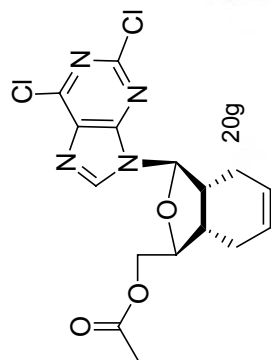

COSY

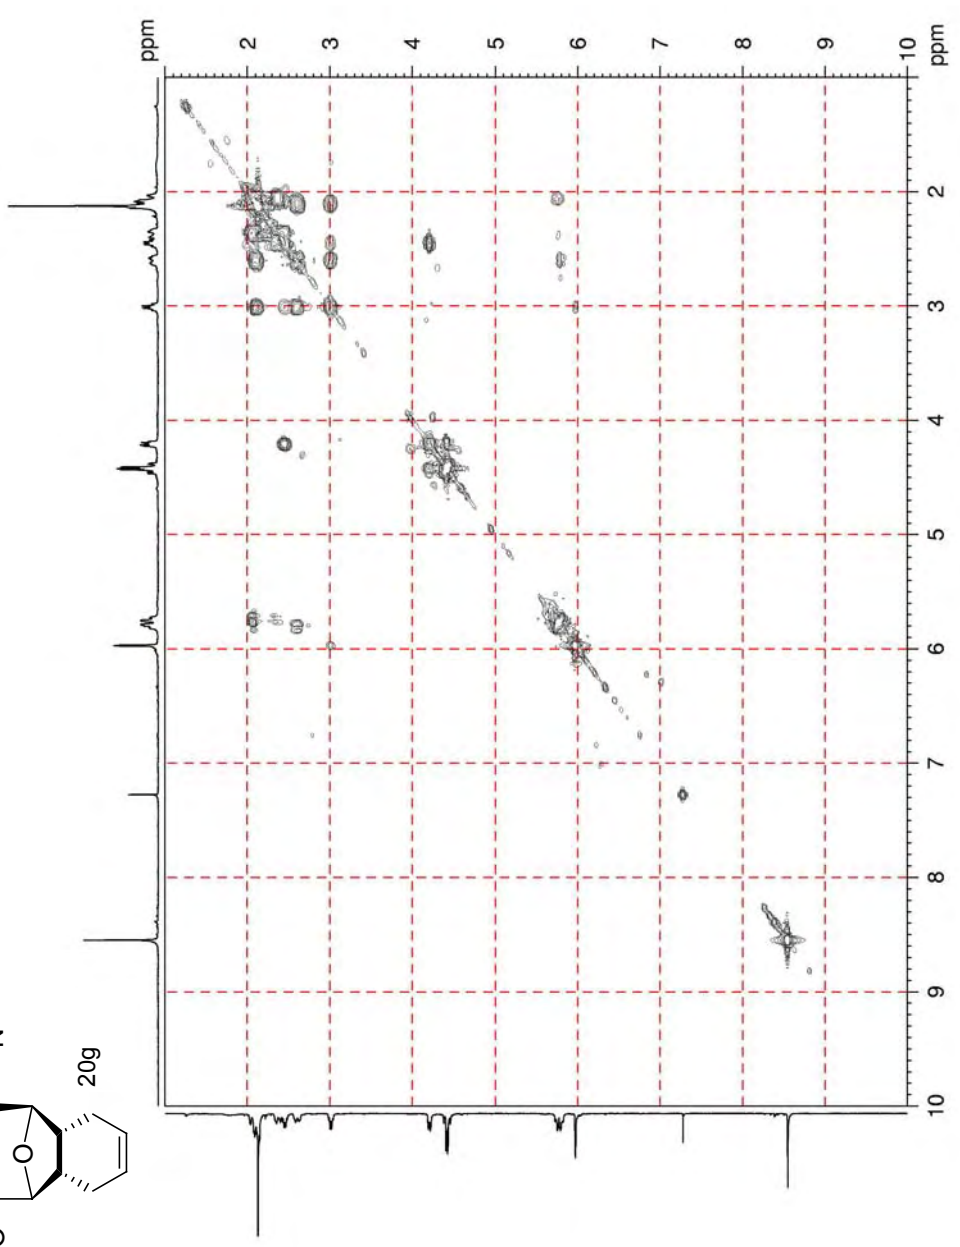

HSQC

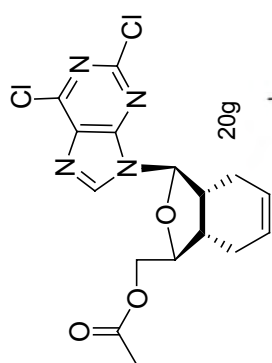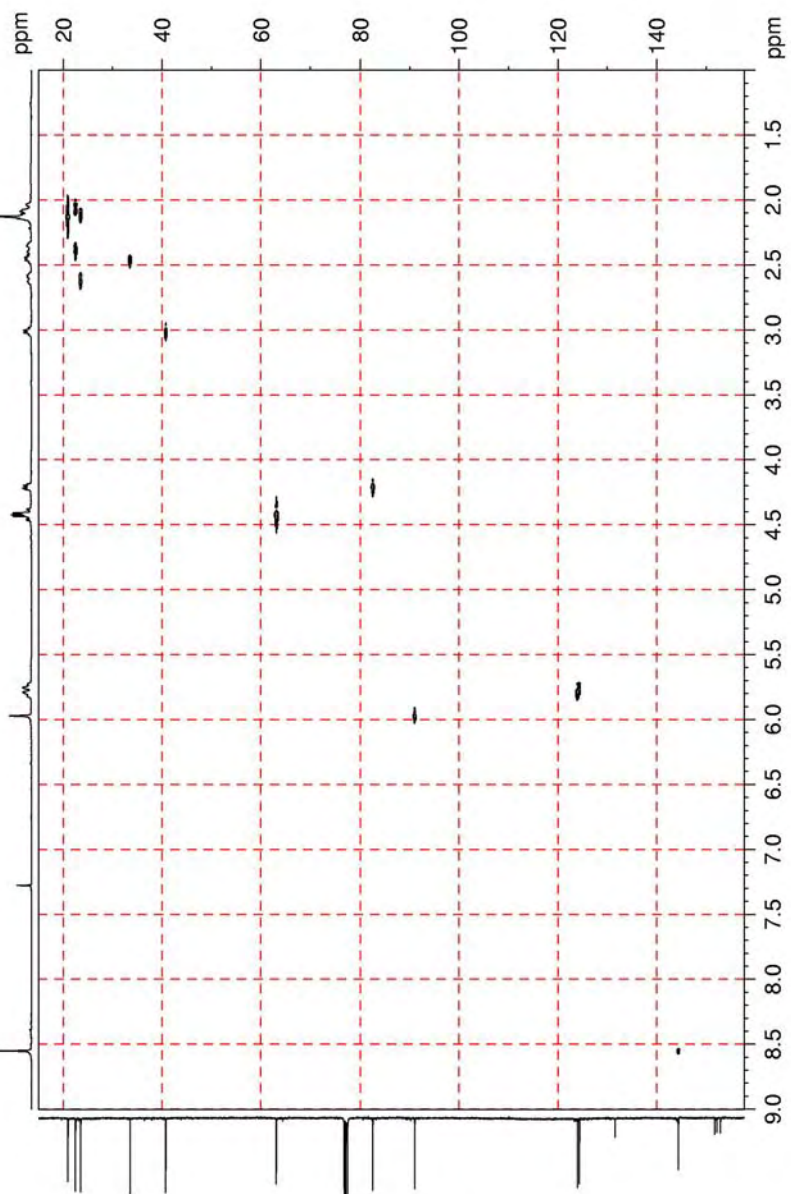

HMBC

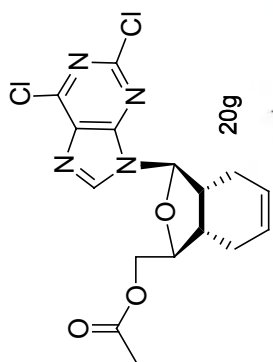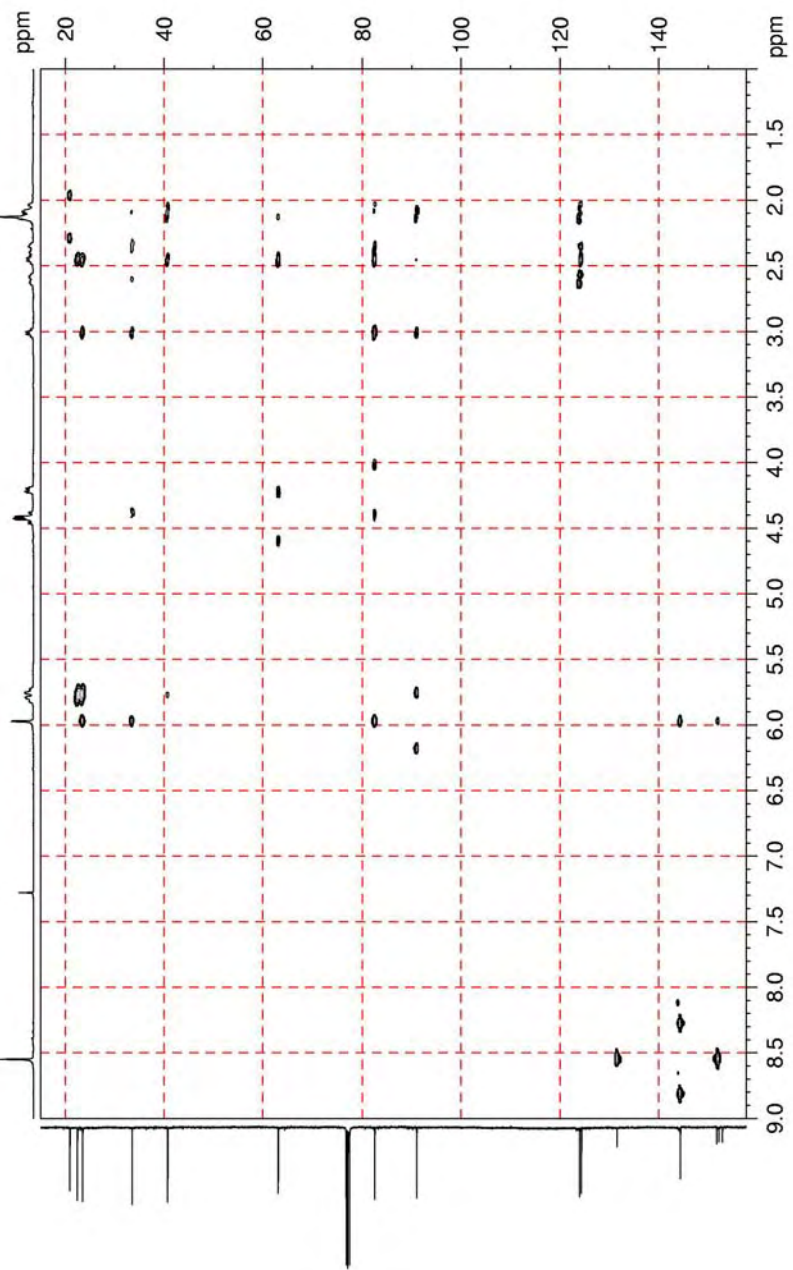

NOESY

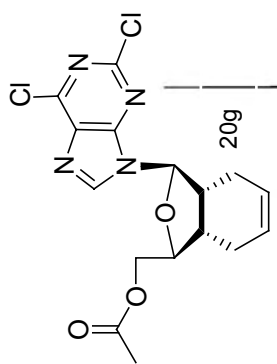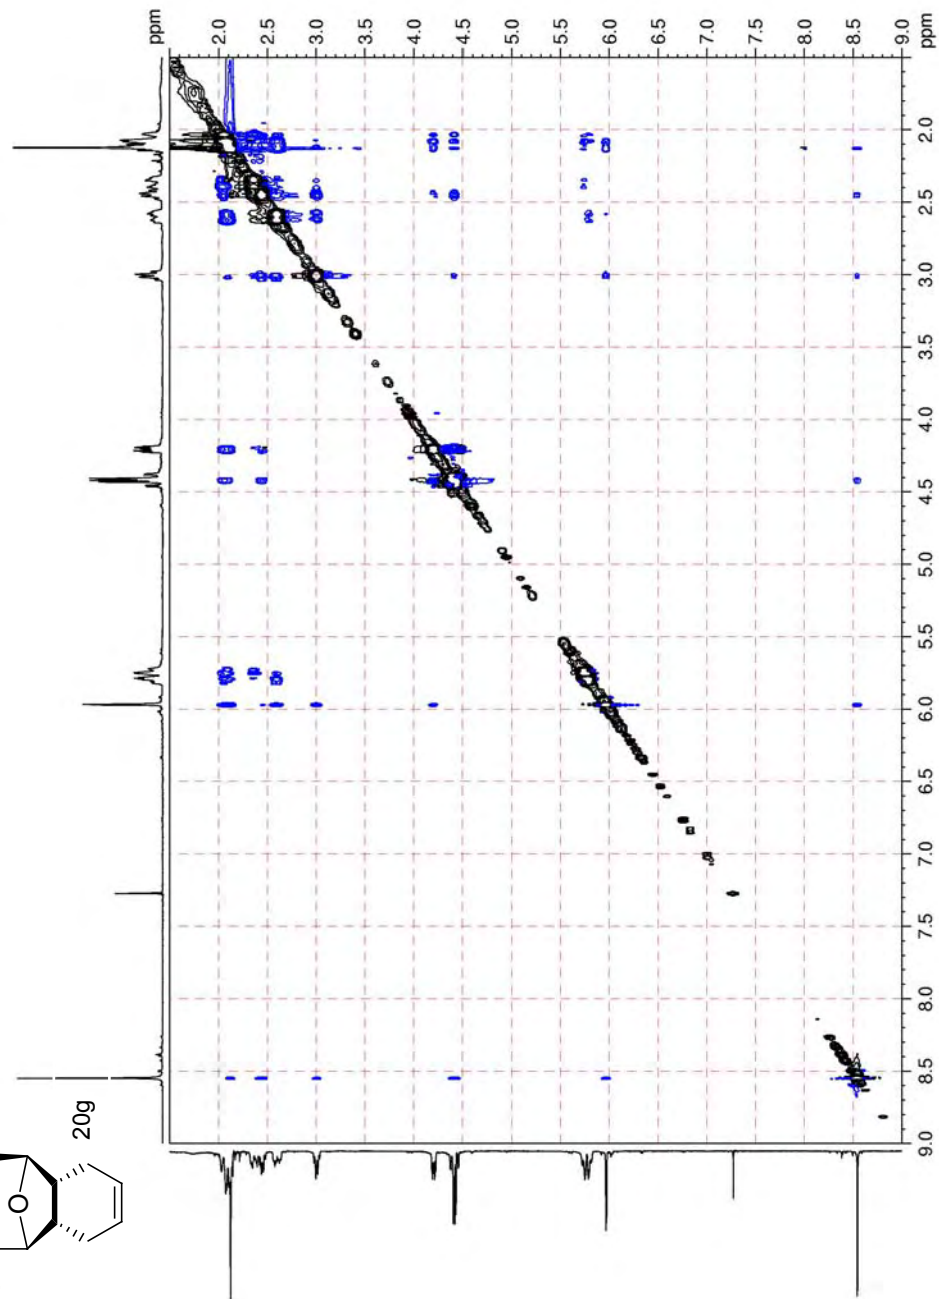

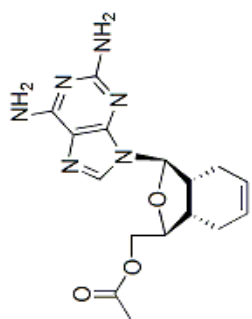

20m

ppm

2

3

4

5

6

7

8

9

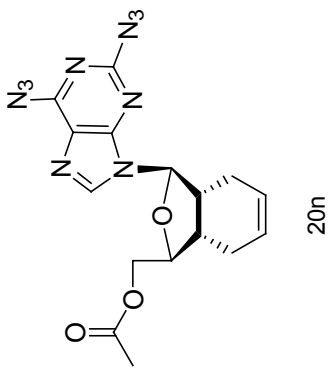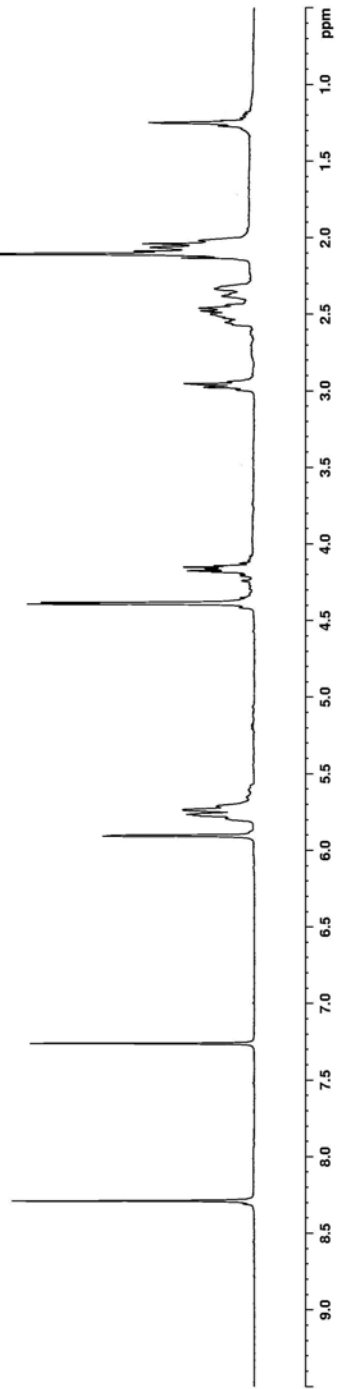

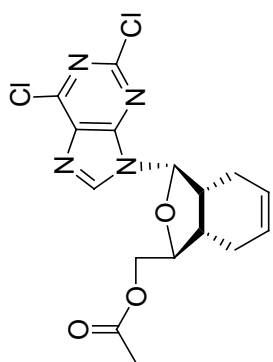

21g

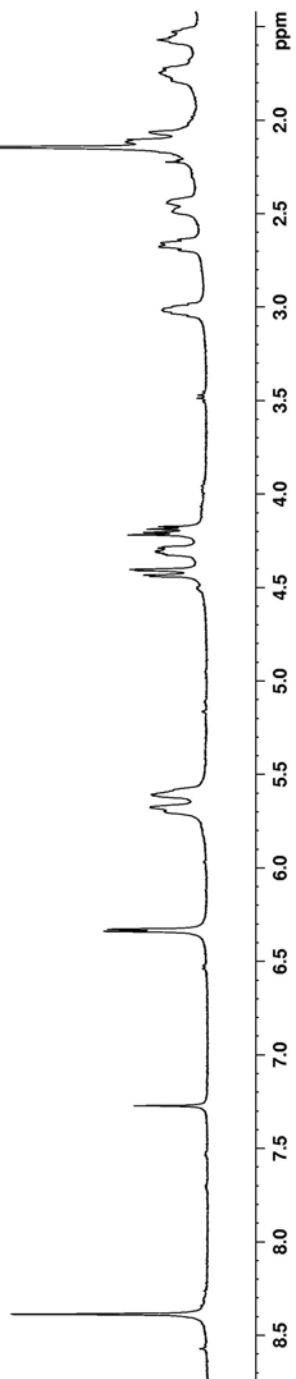

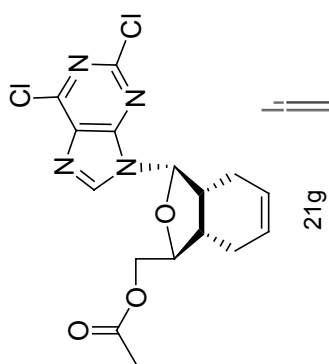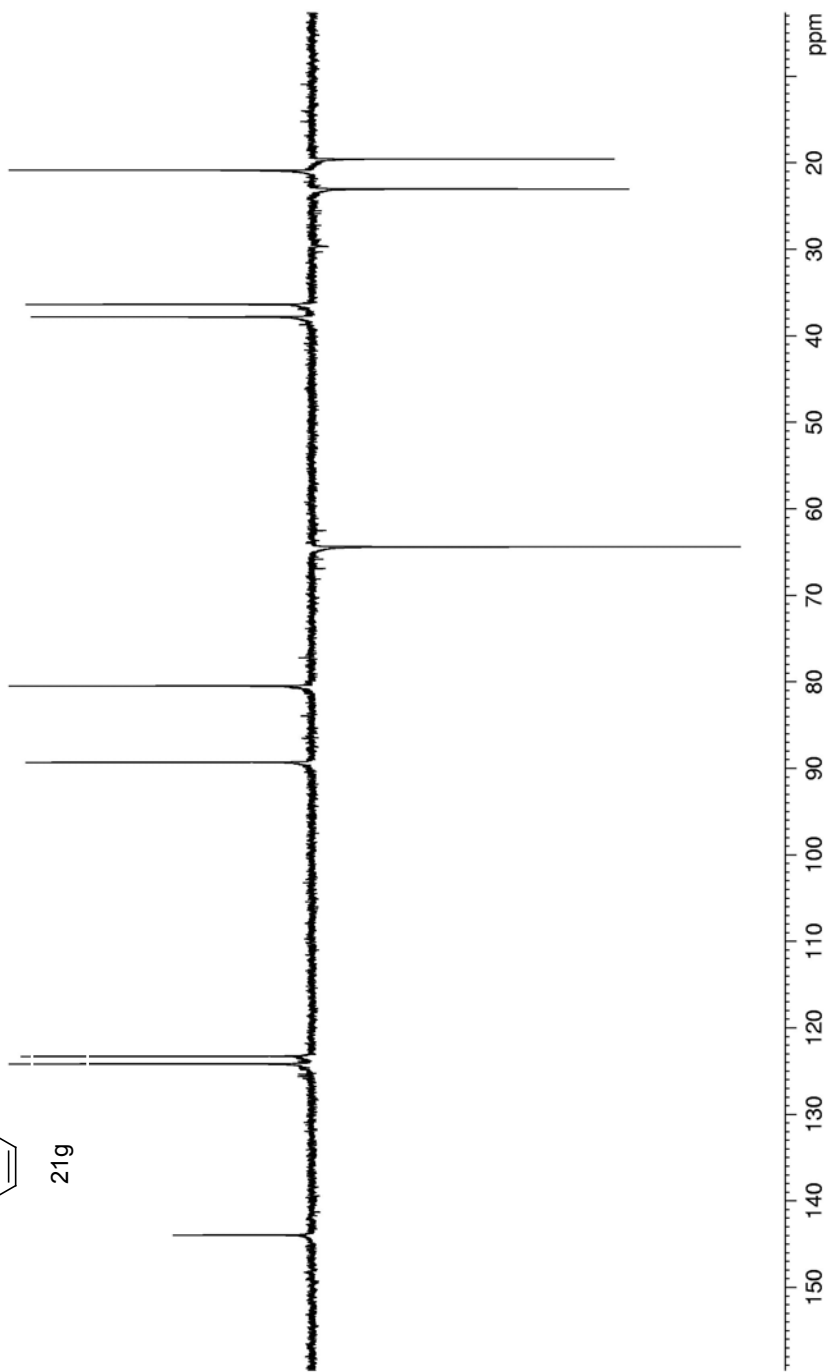



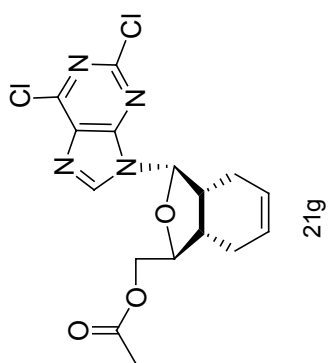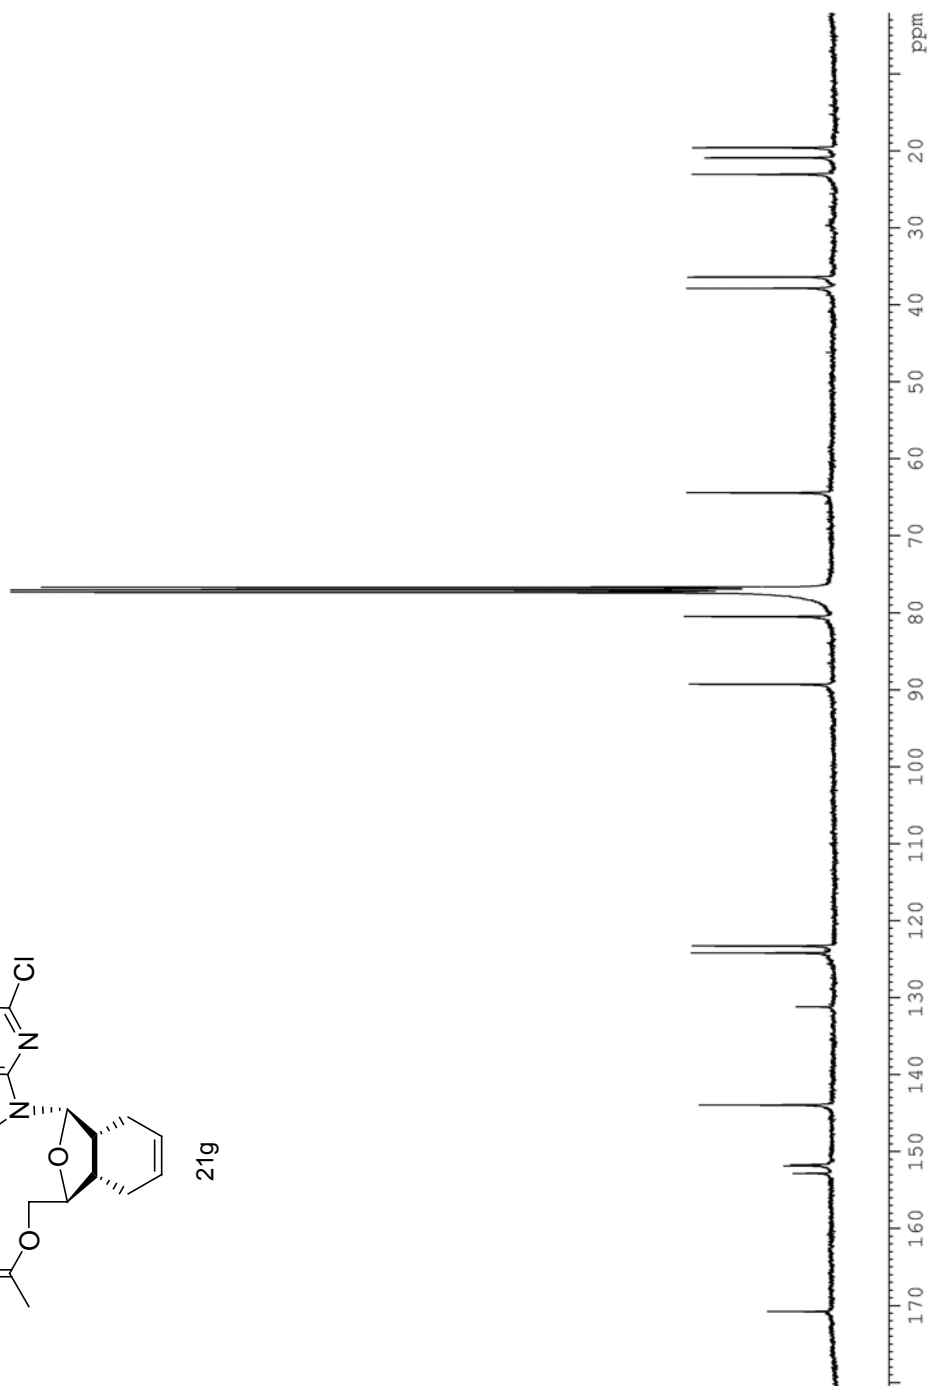

COSY

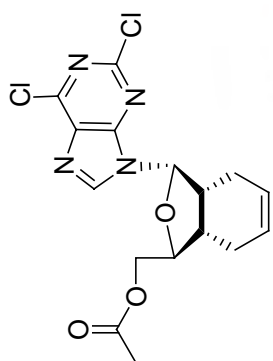

21g

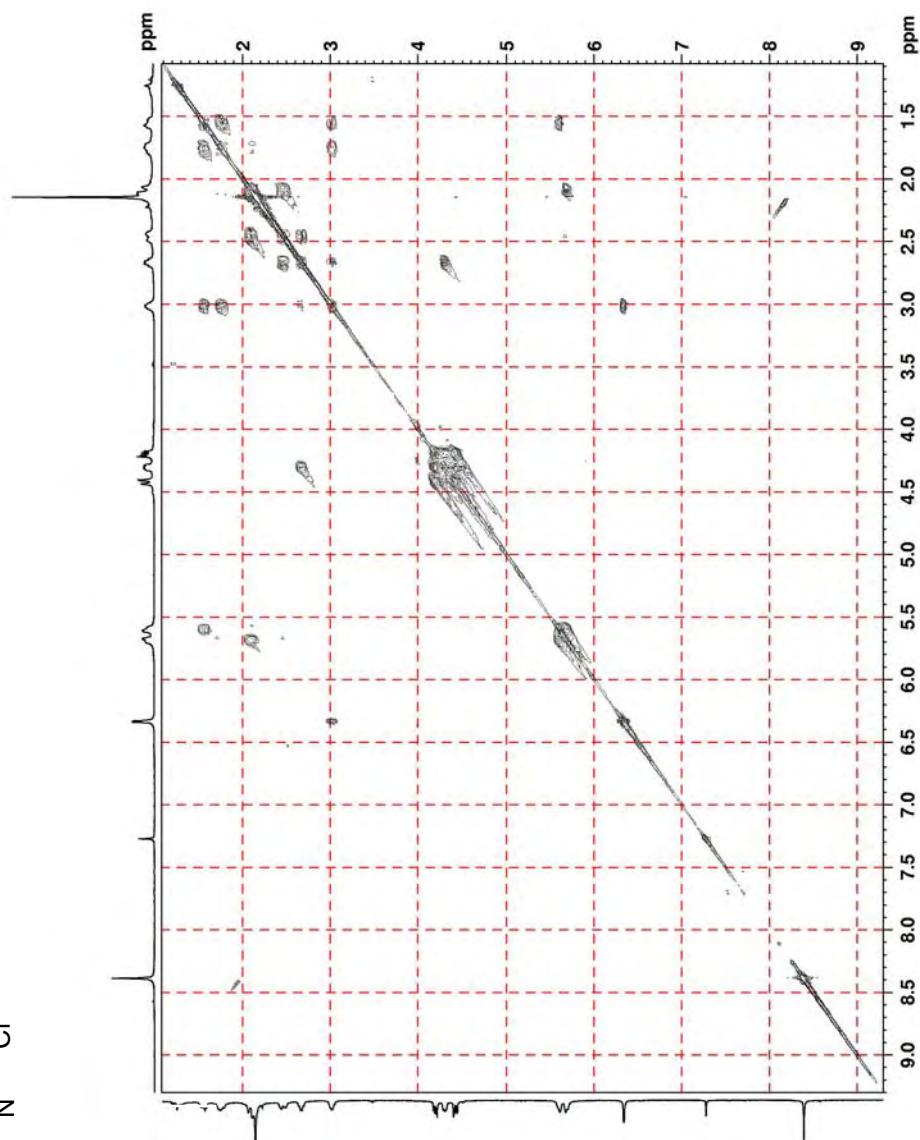

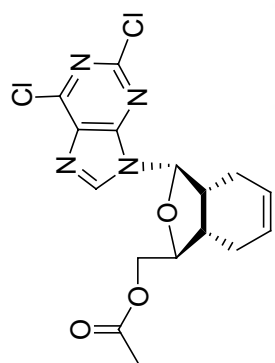

21g

HSQC

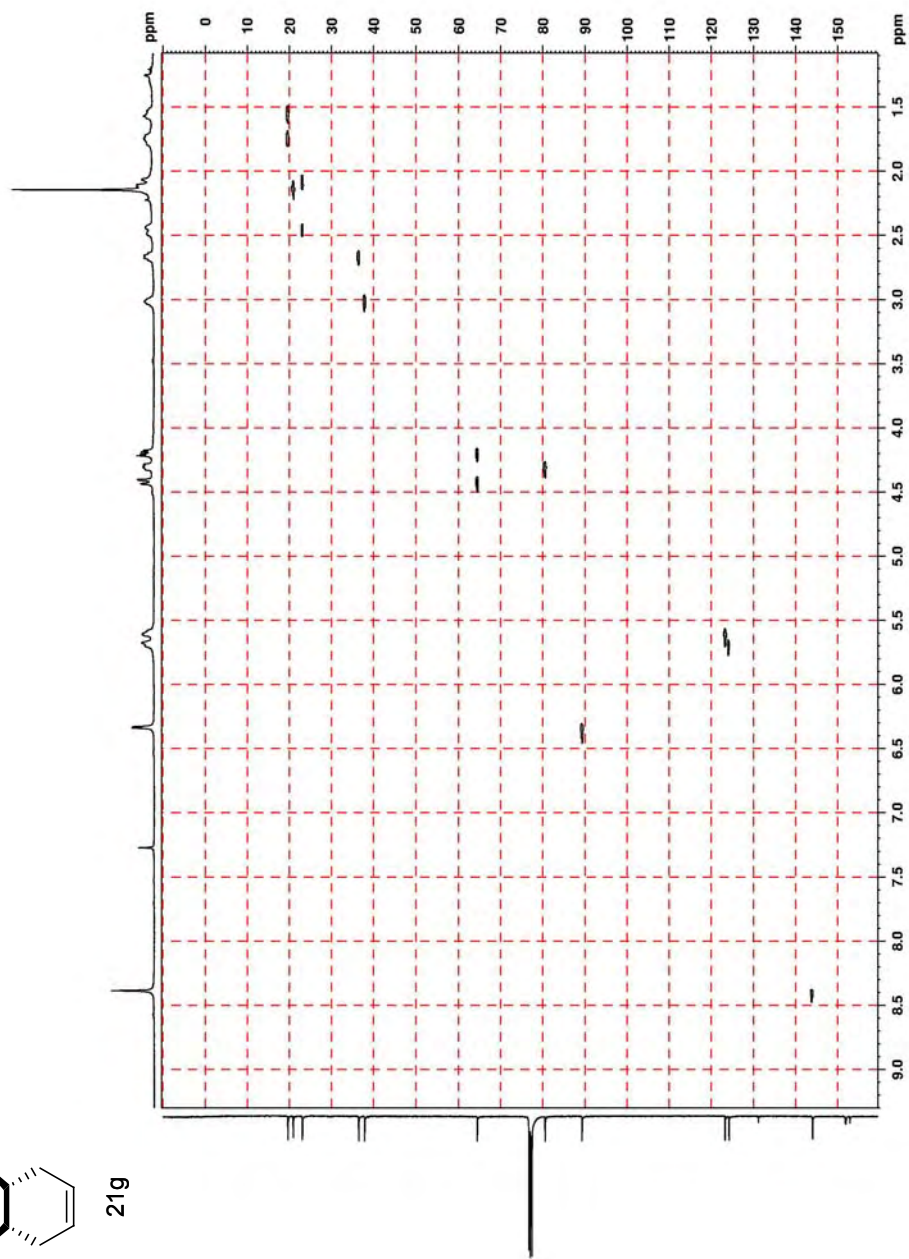

HMBC

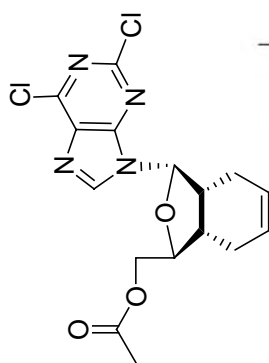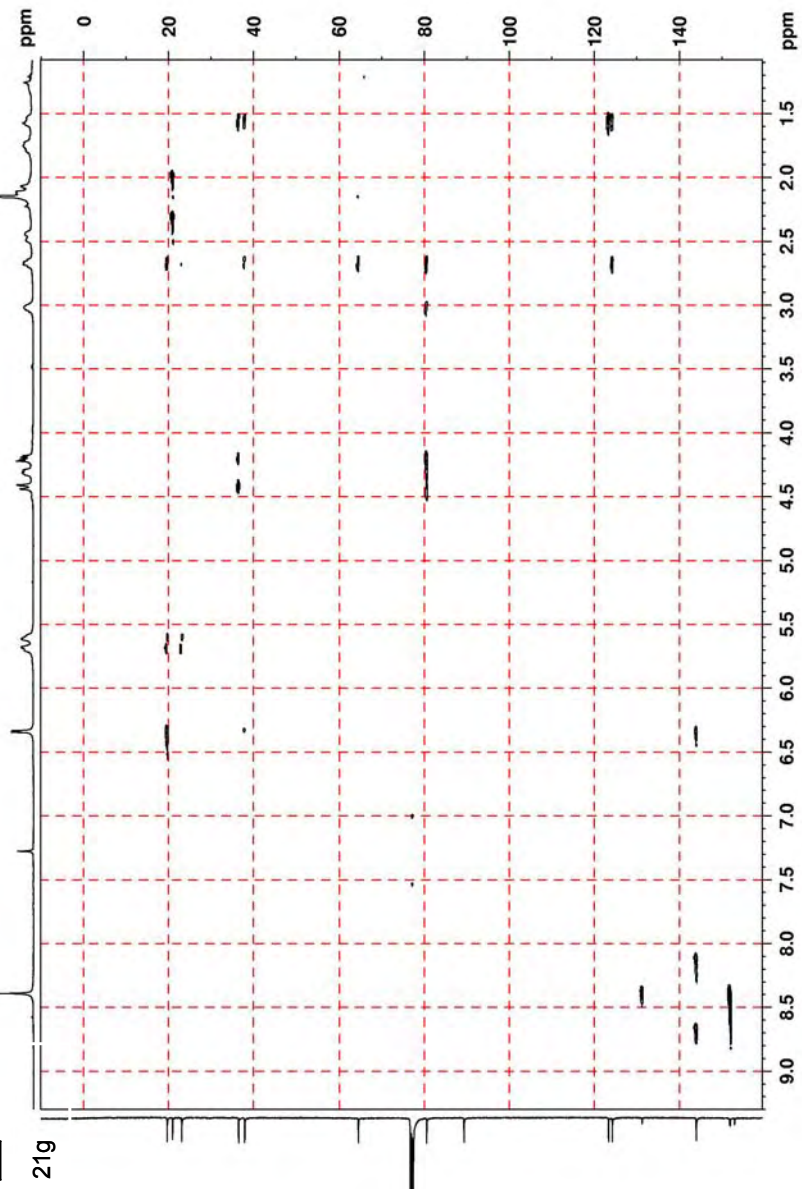

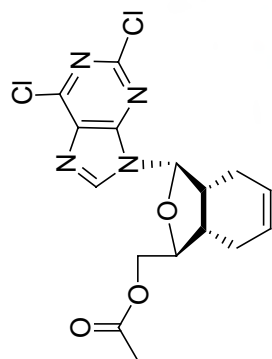

21g

### NOESY

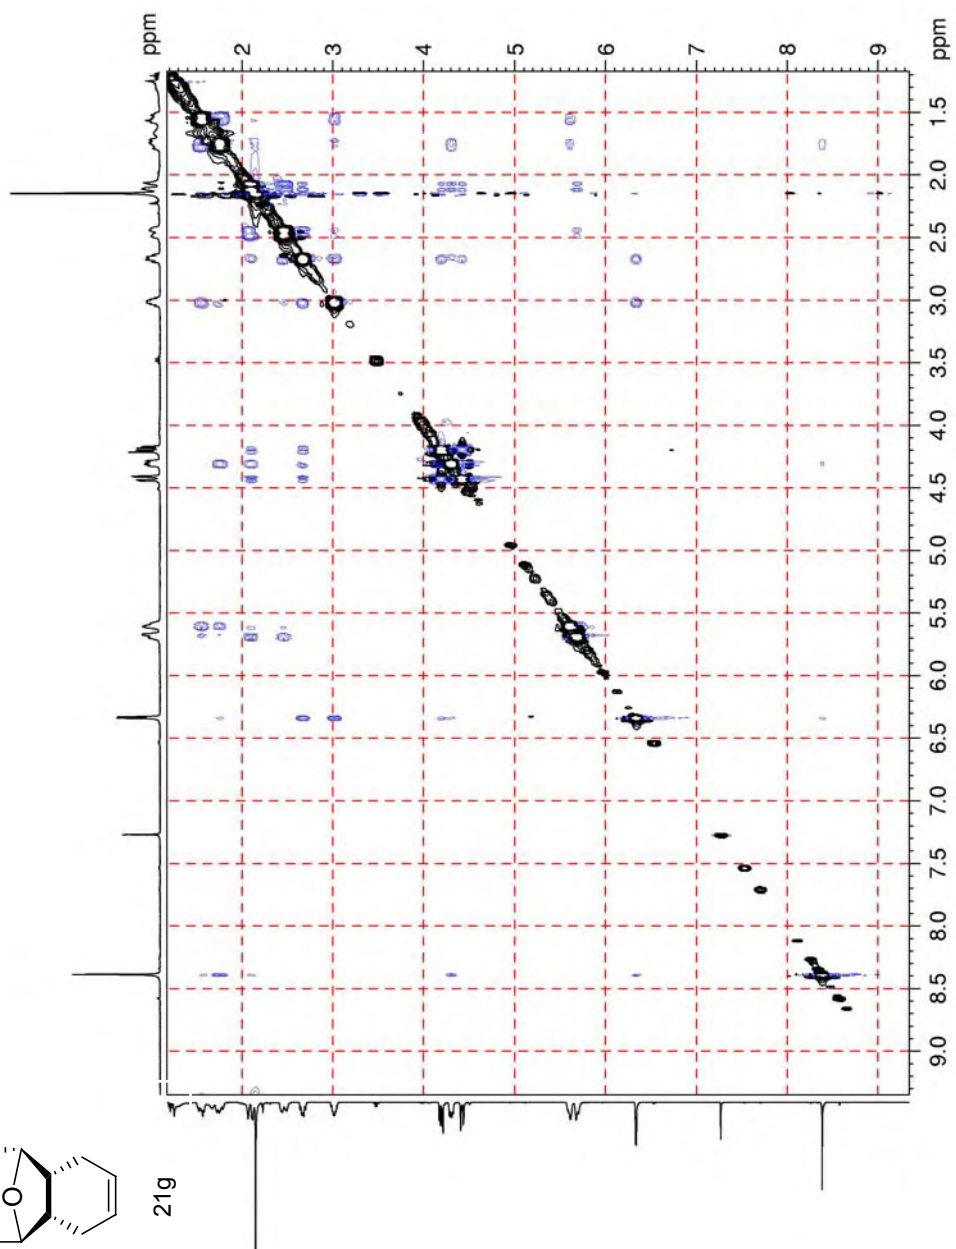

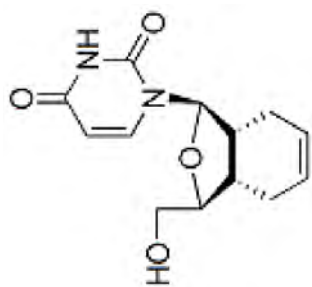

22a

S62

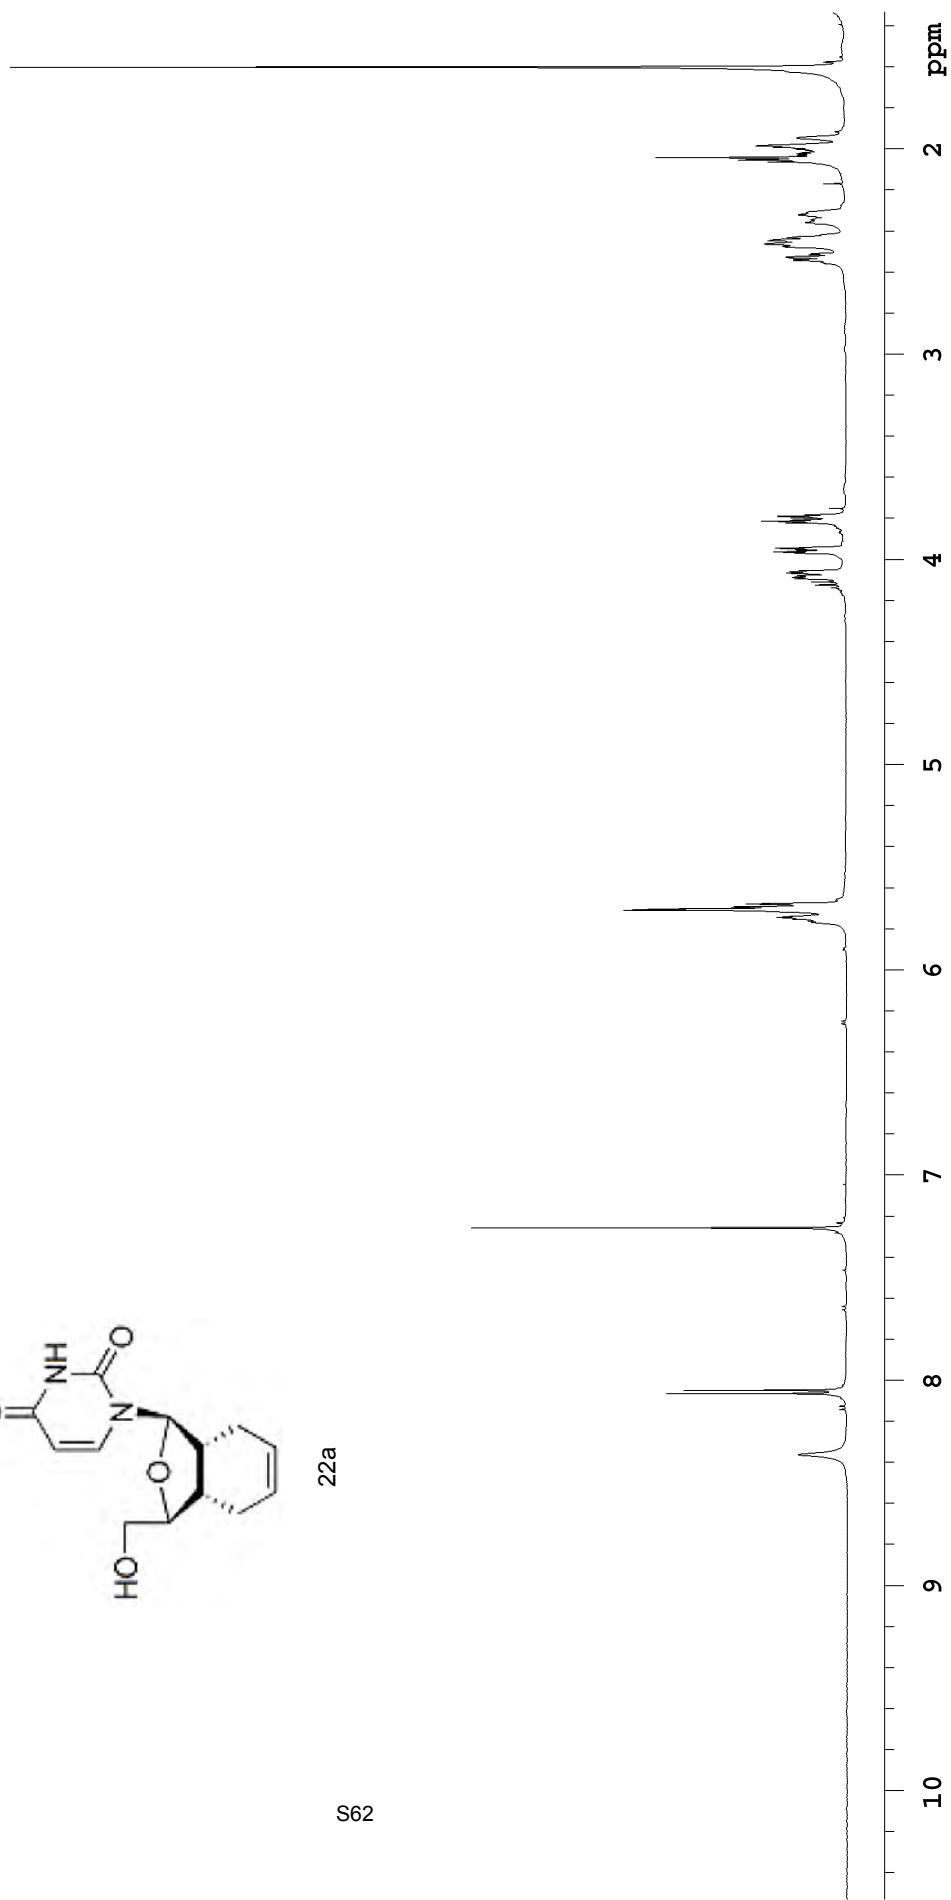

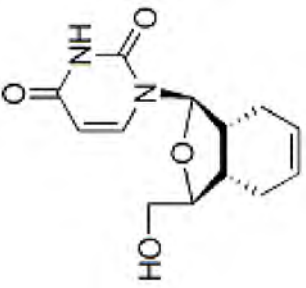

22a

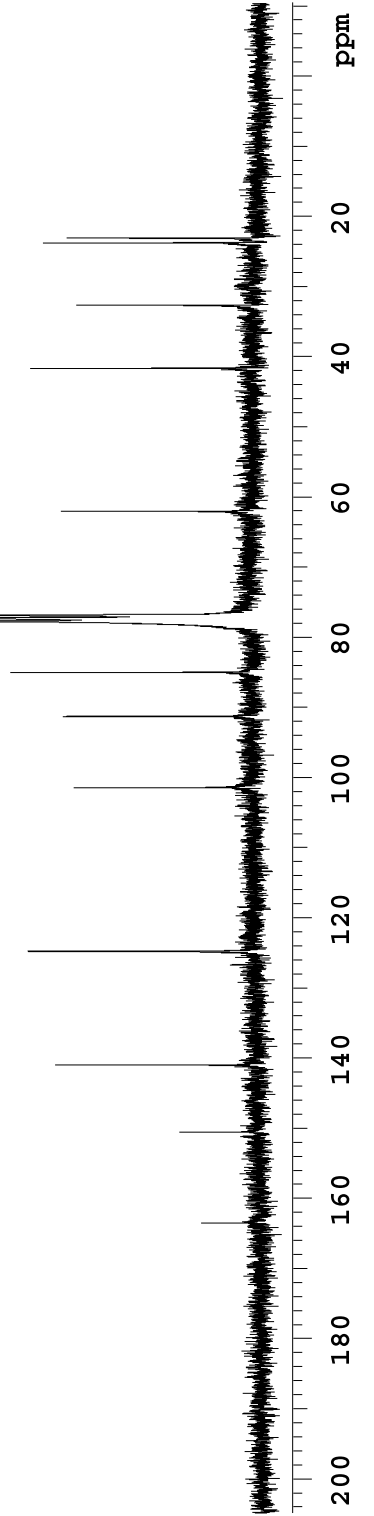

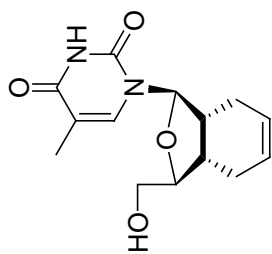

22b

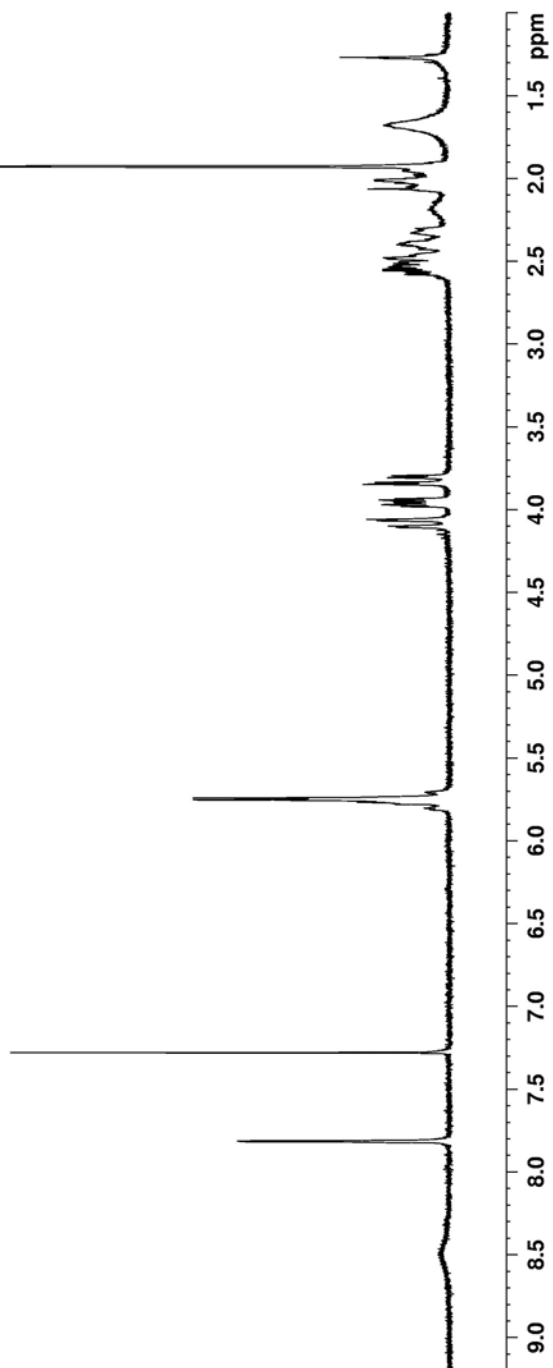



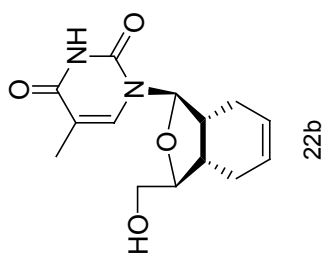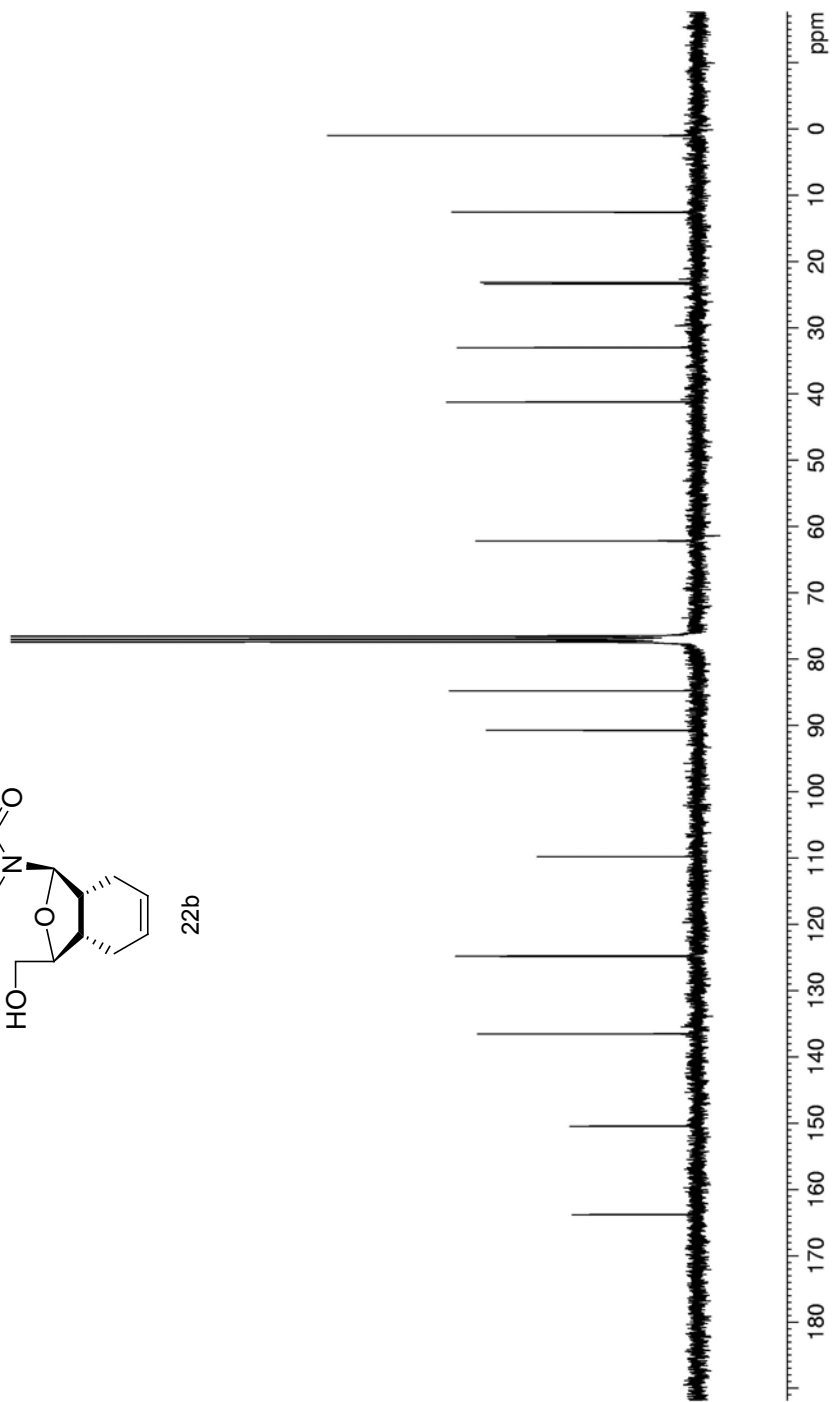

COSY

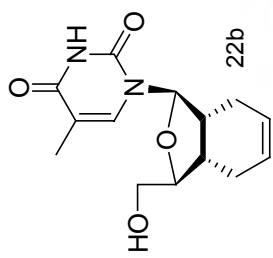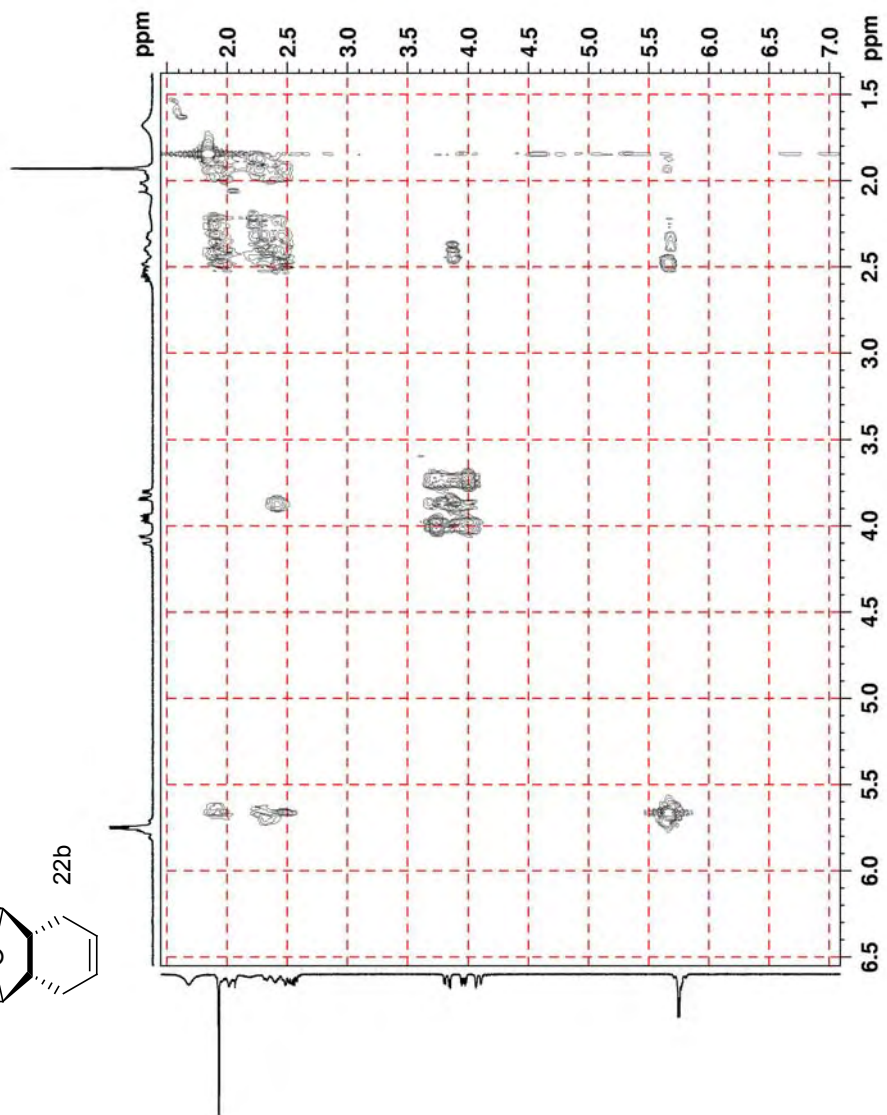

HSQC

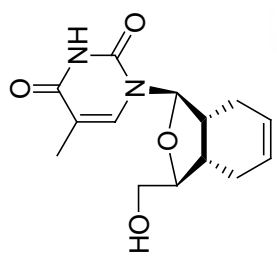

22b

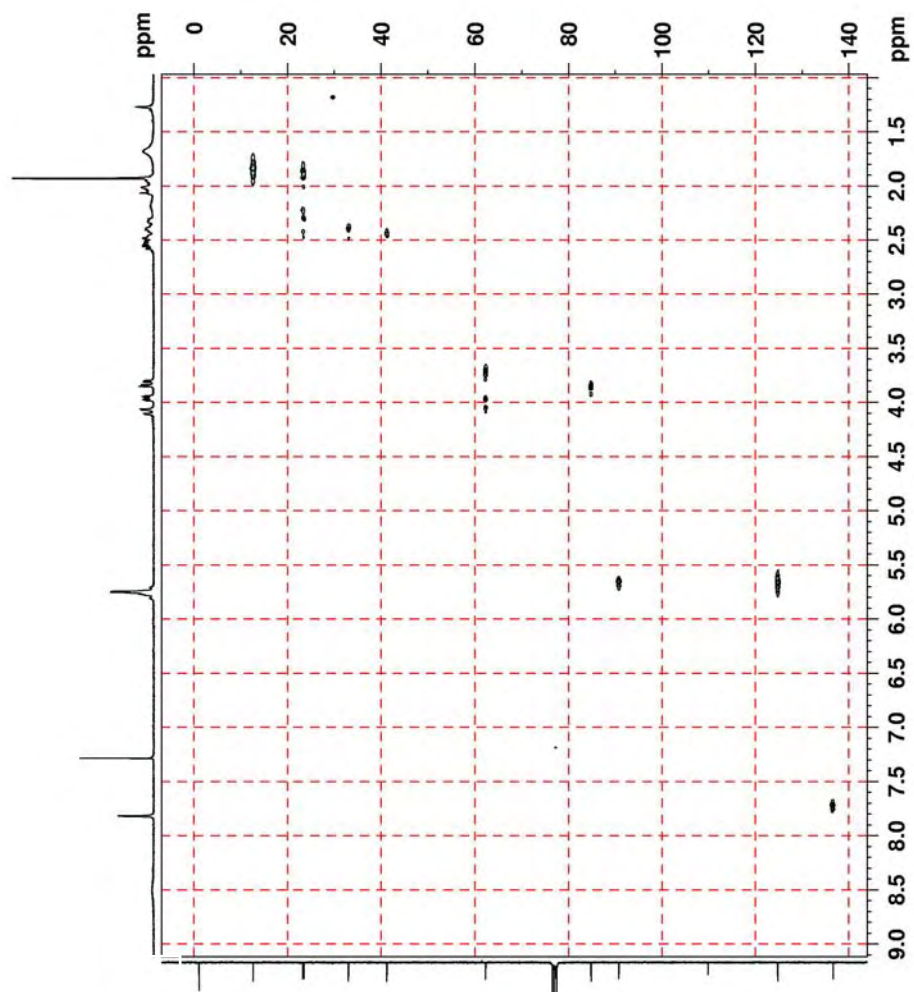

HMBC

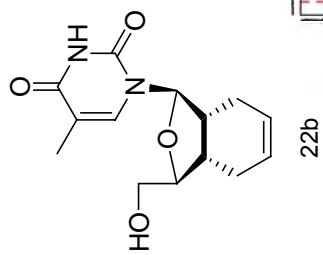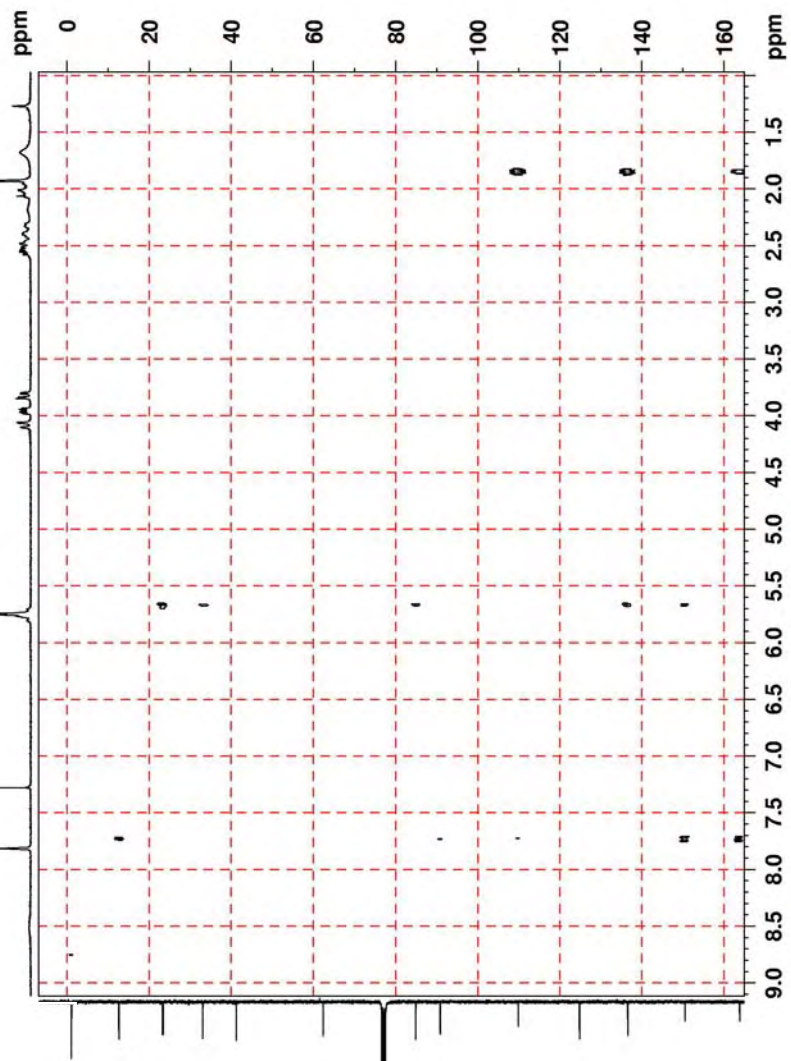

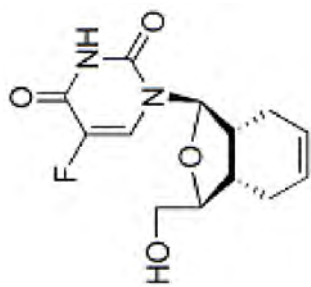

22c

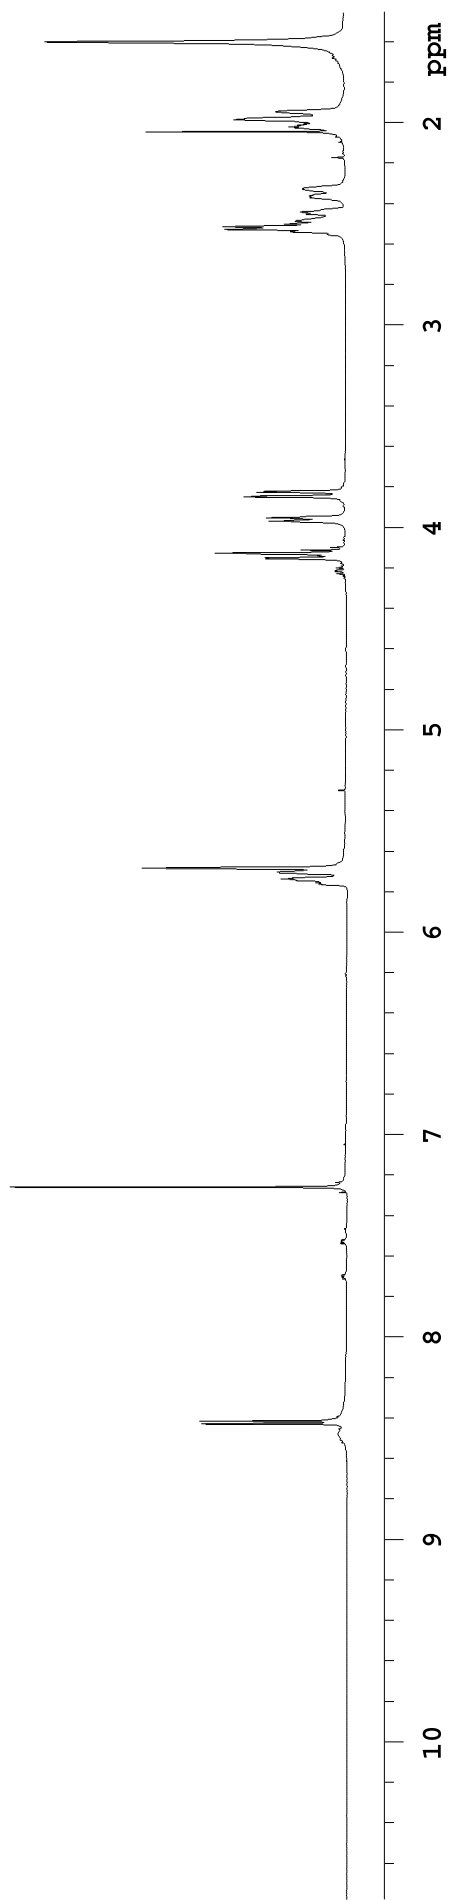

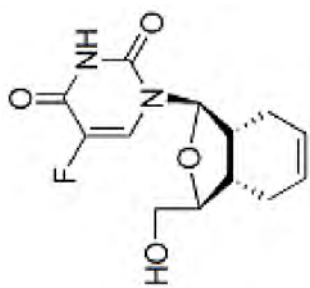

22c

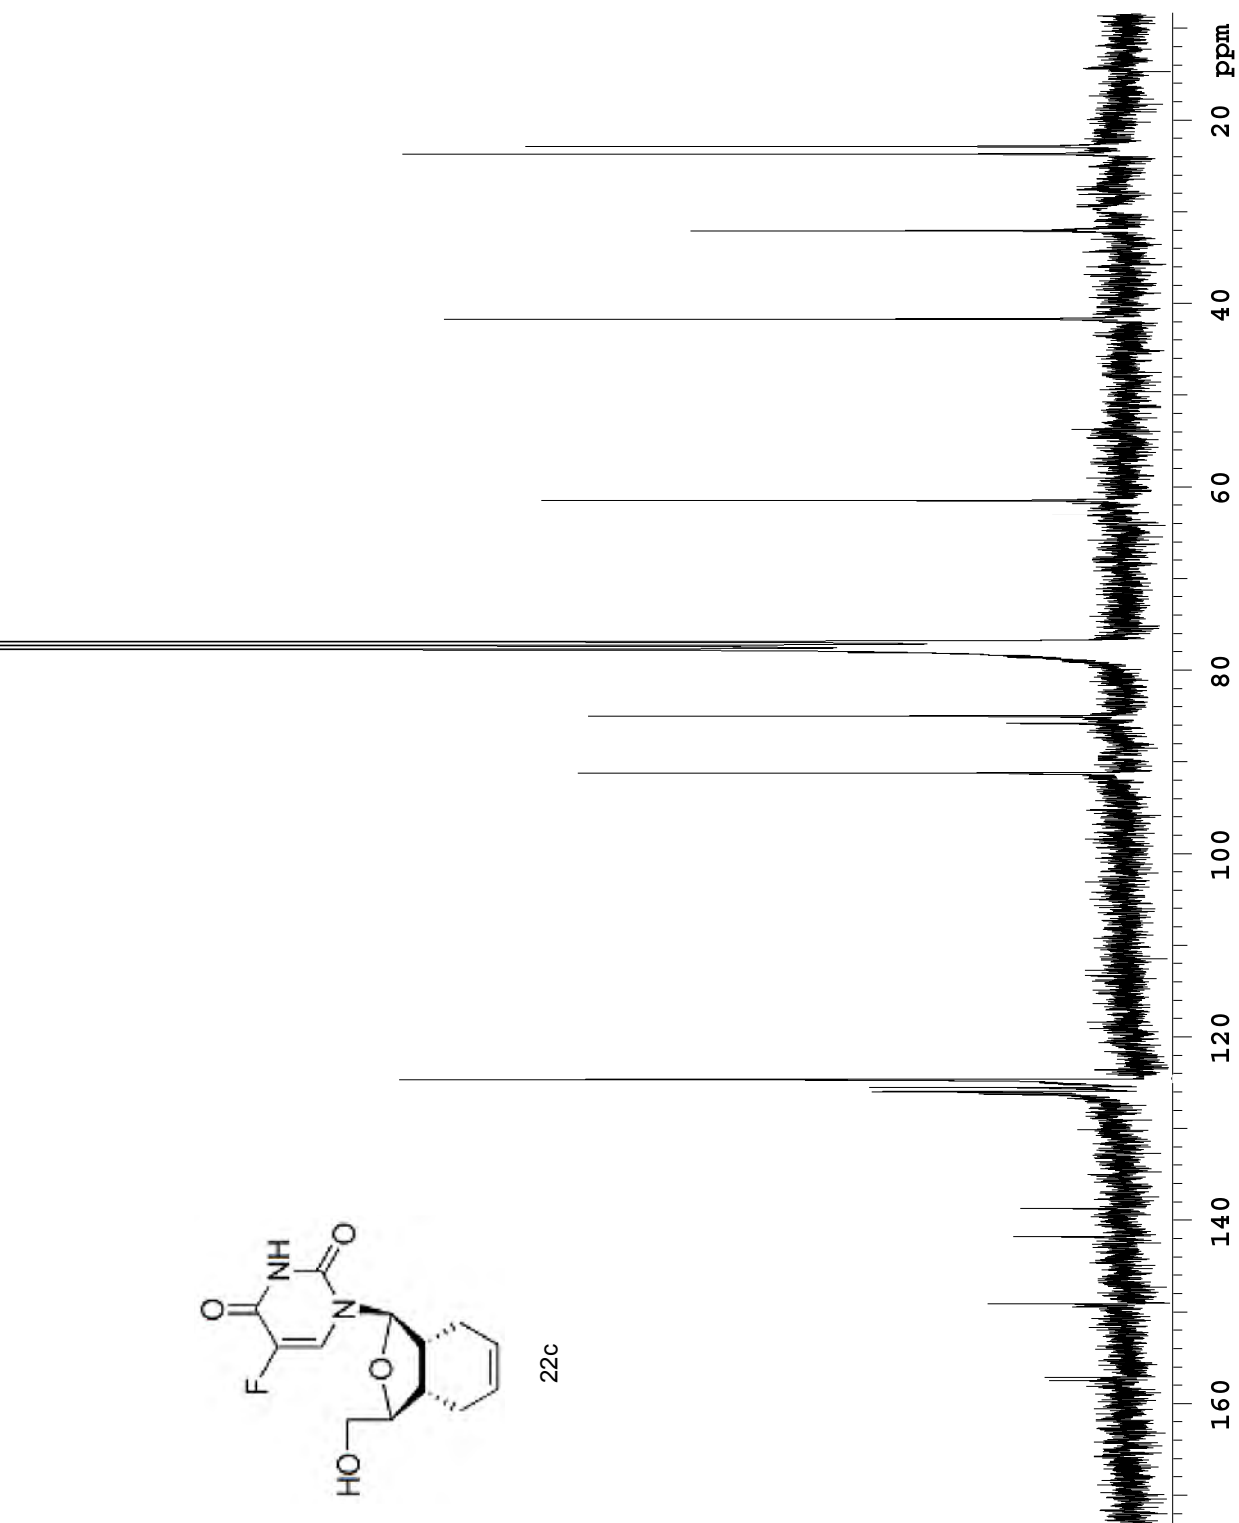

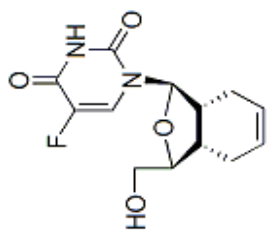

22c

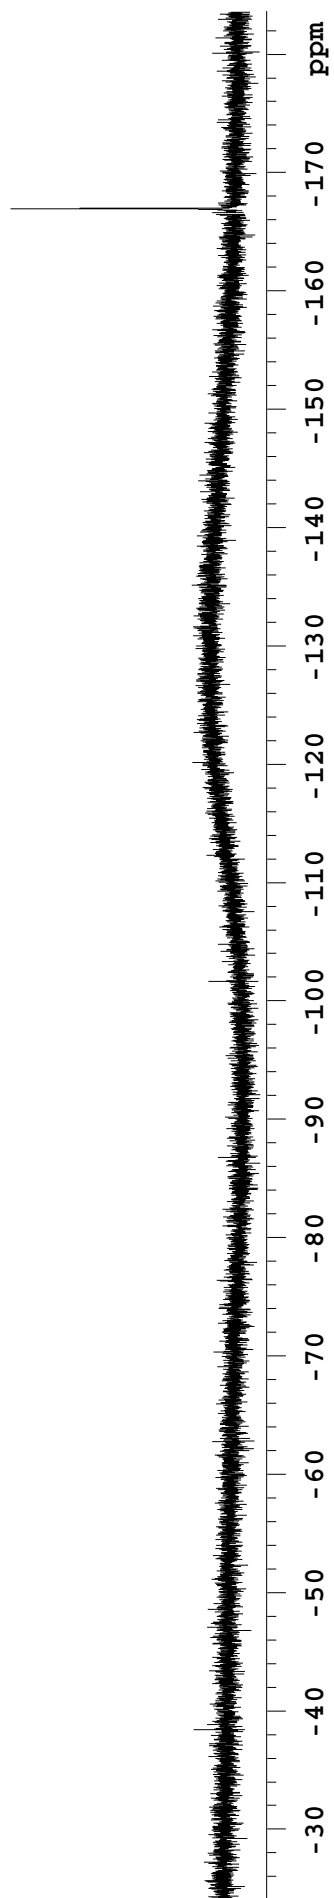

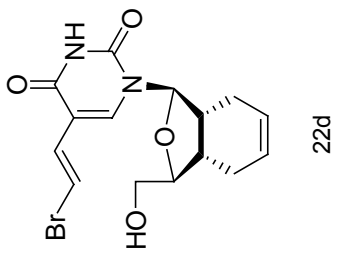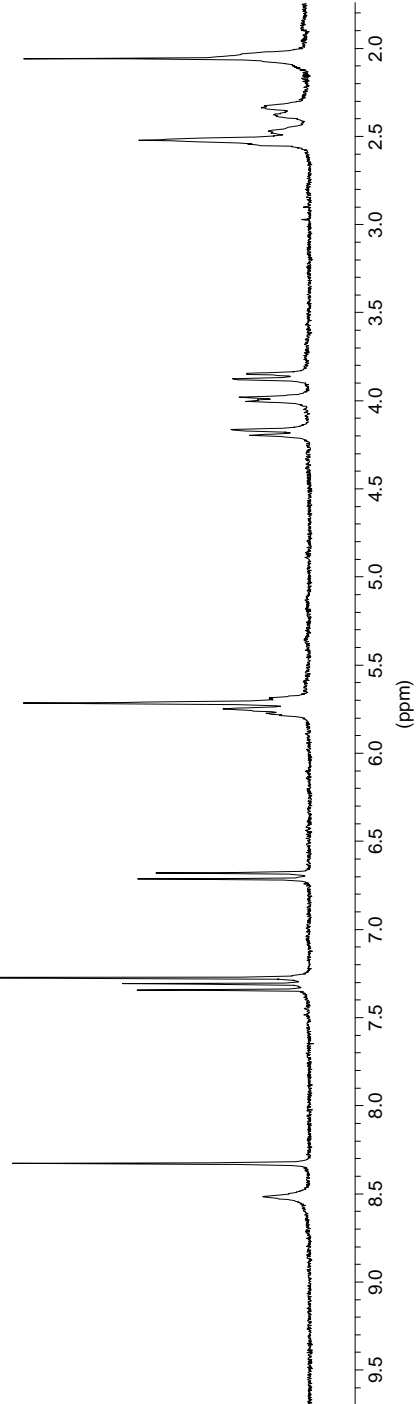



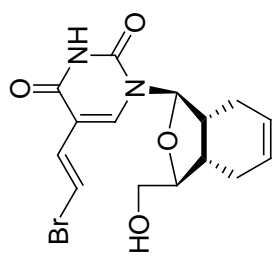

22d

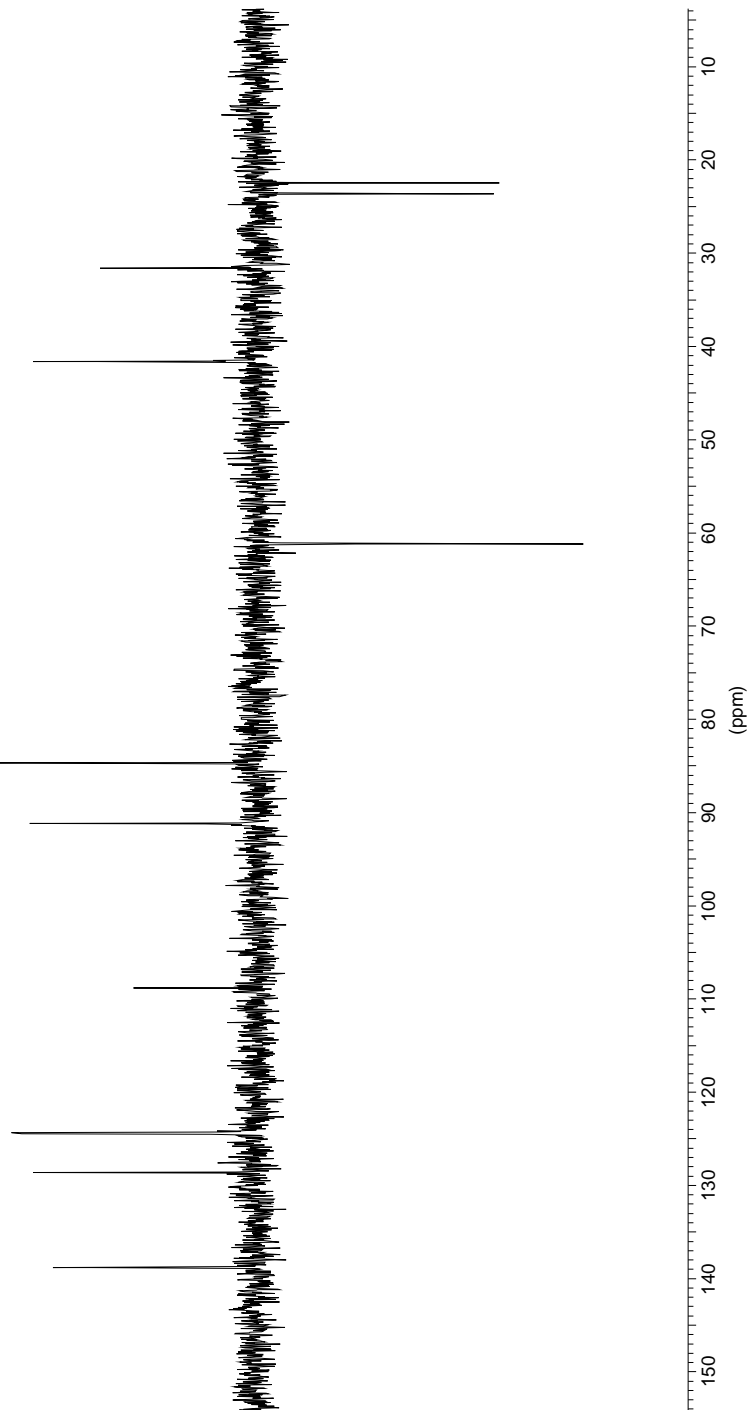

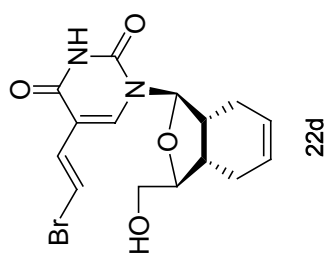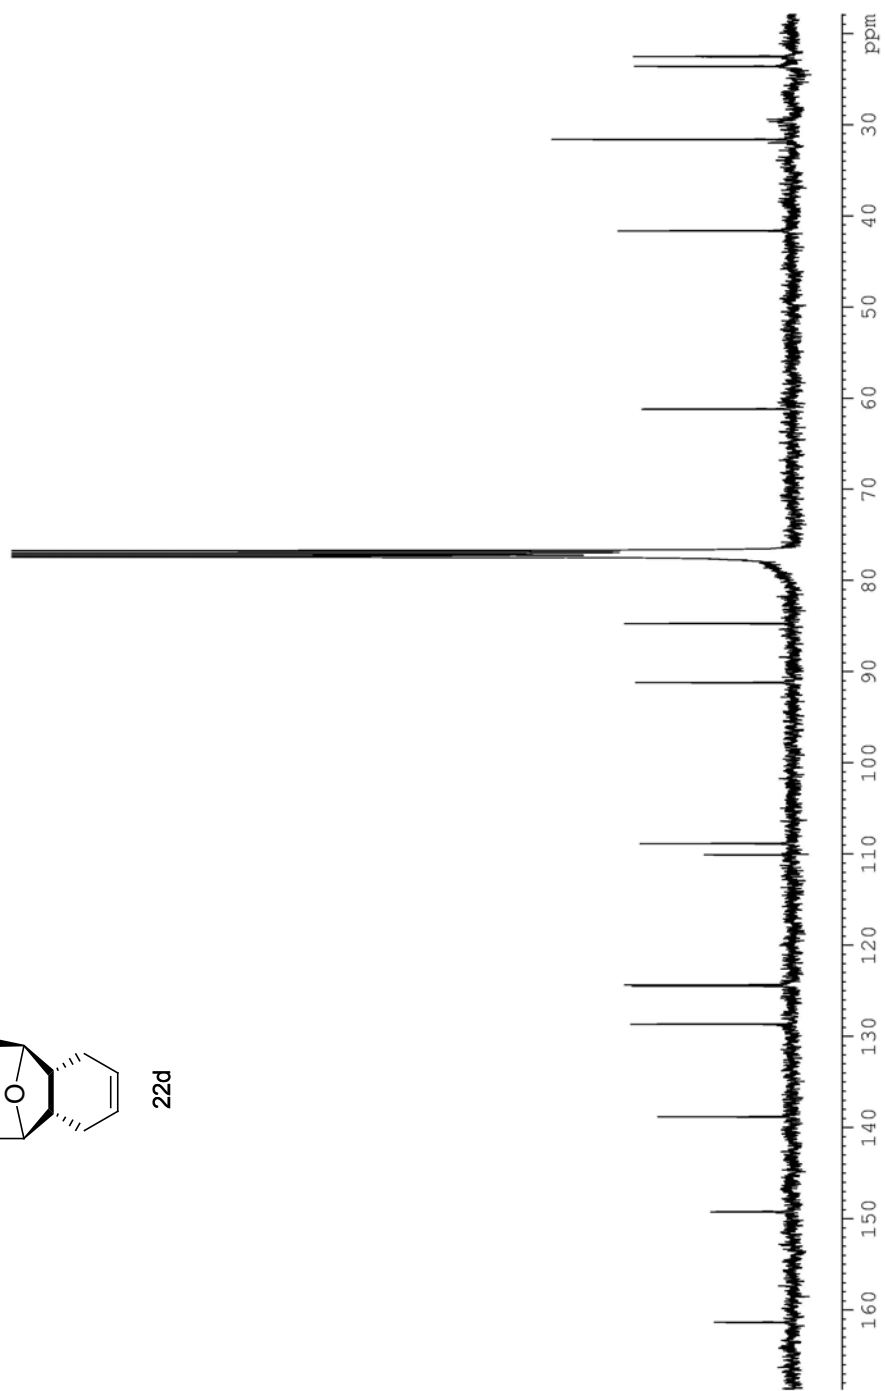

COSY

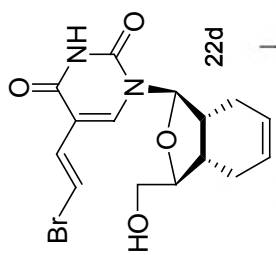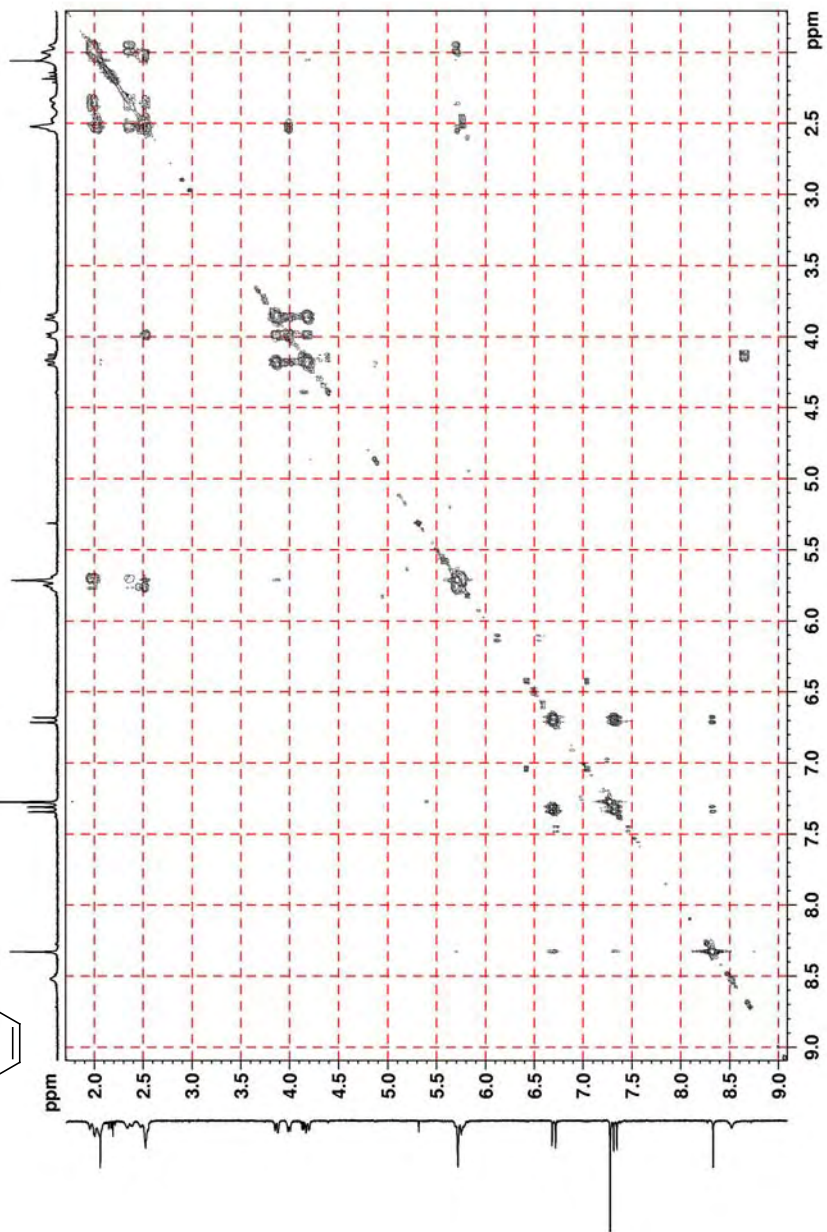

HSQC

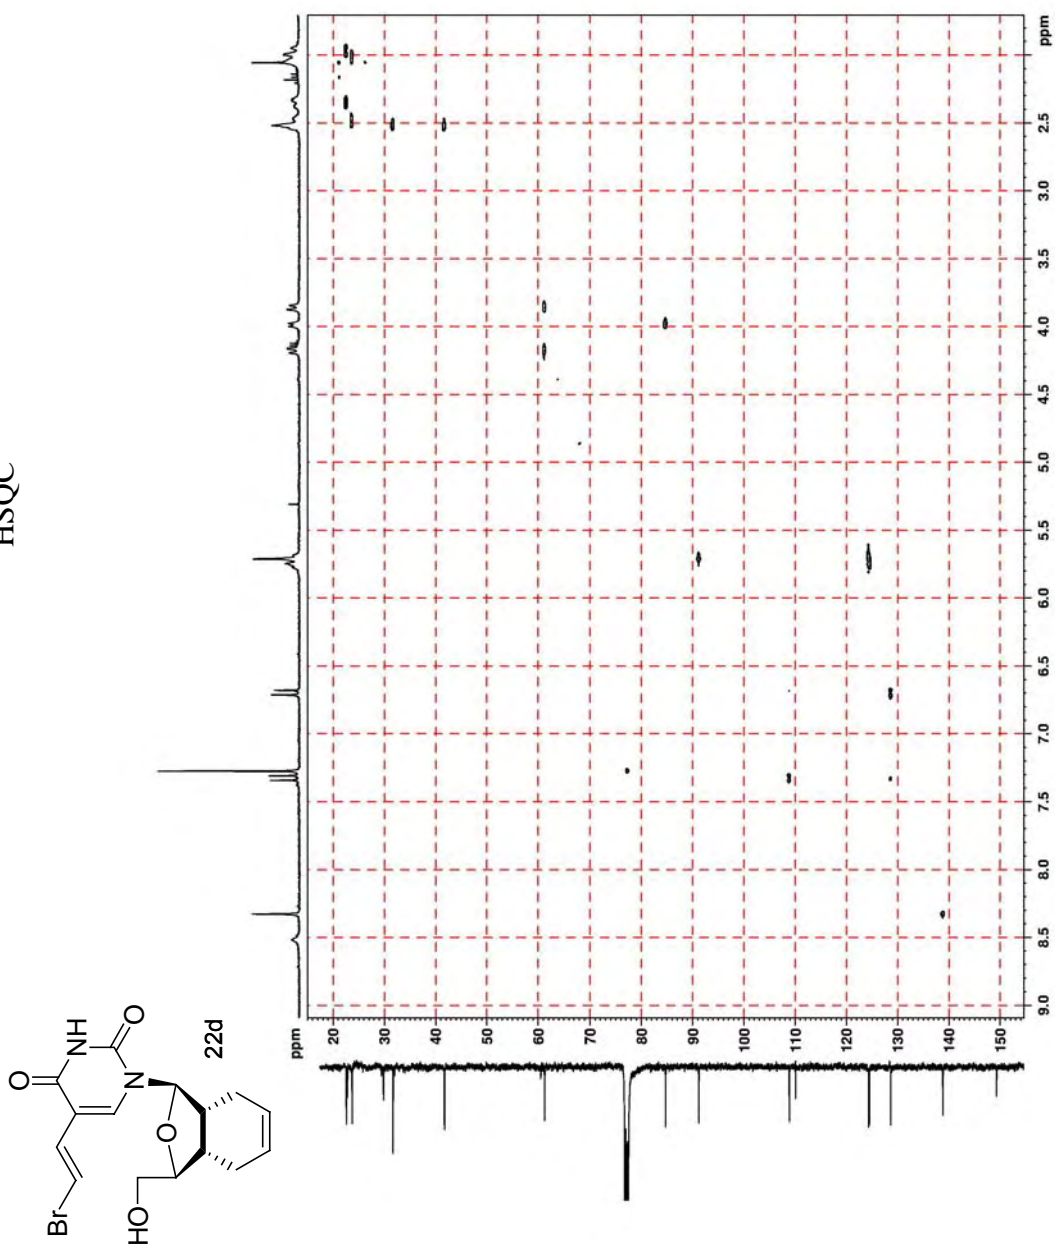



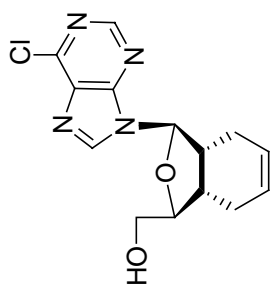

22f

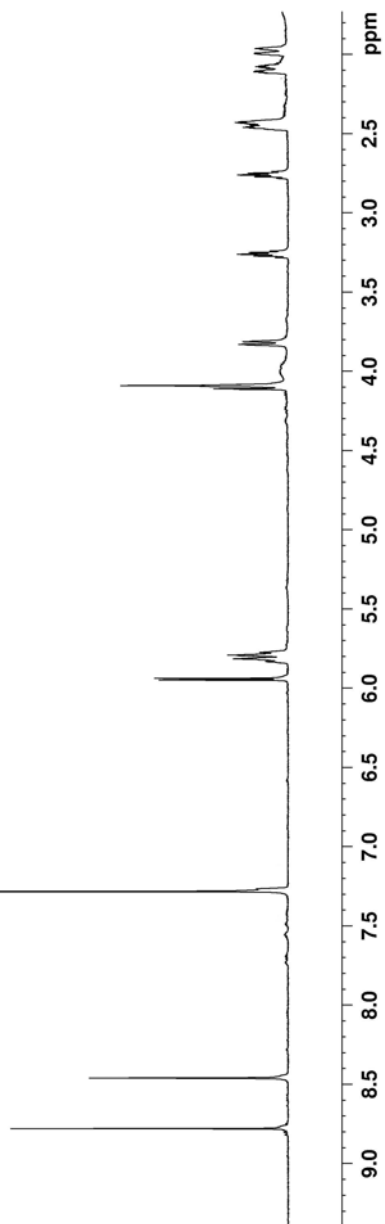

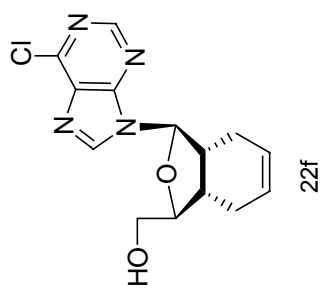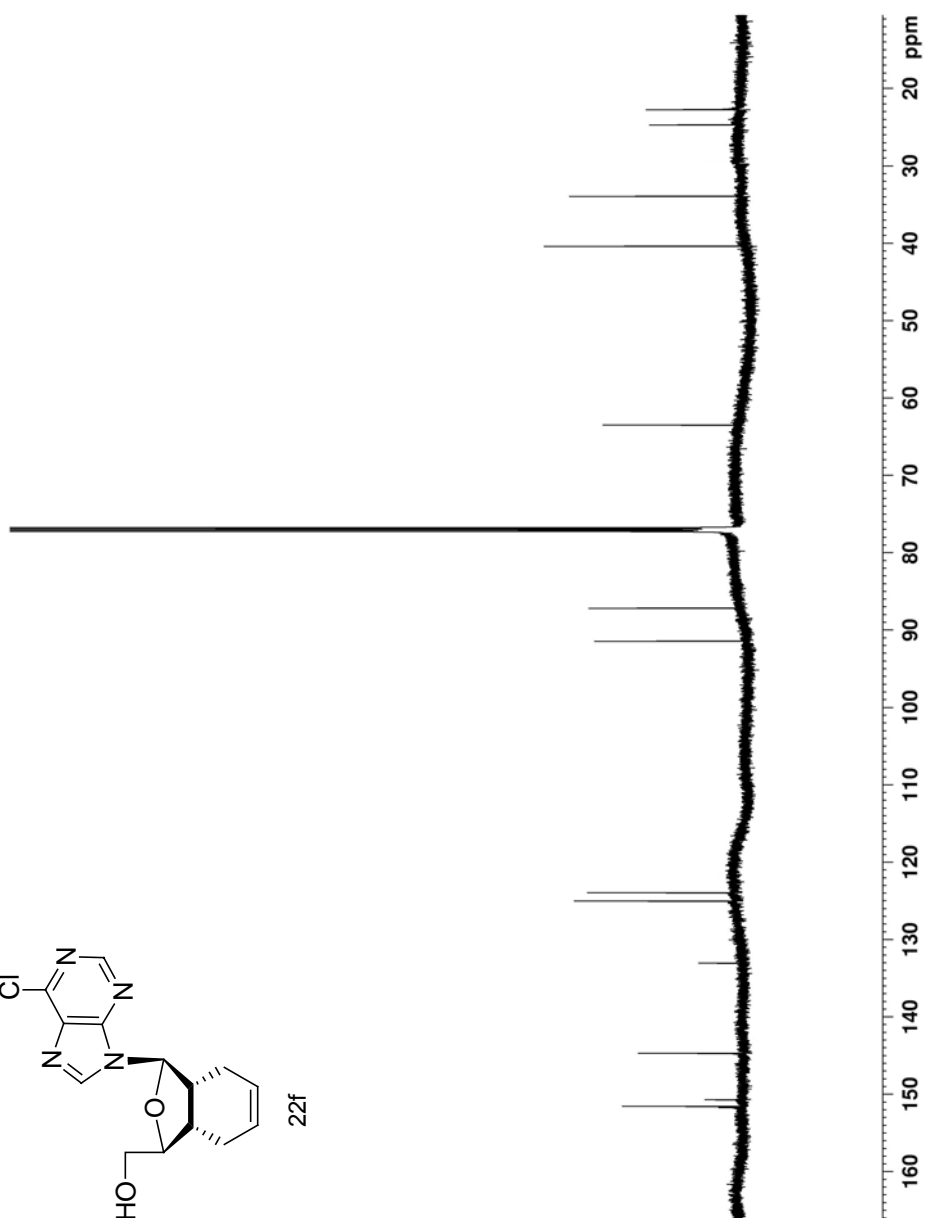

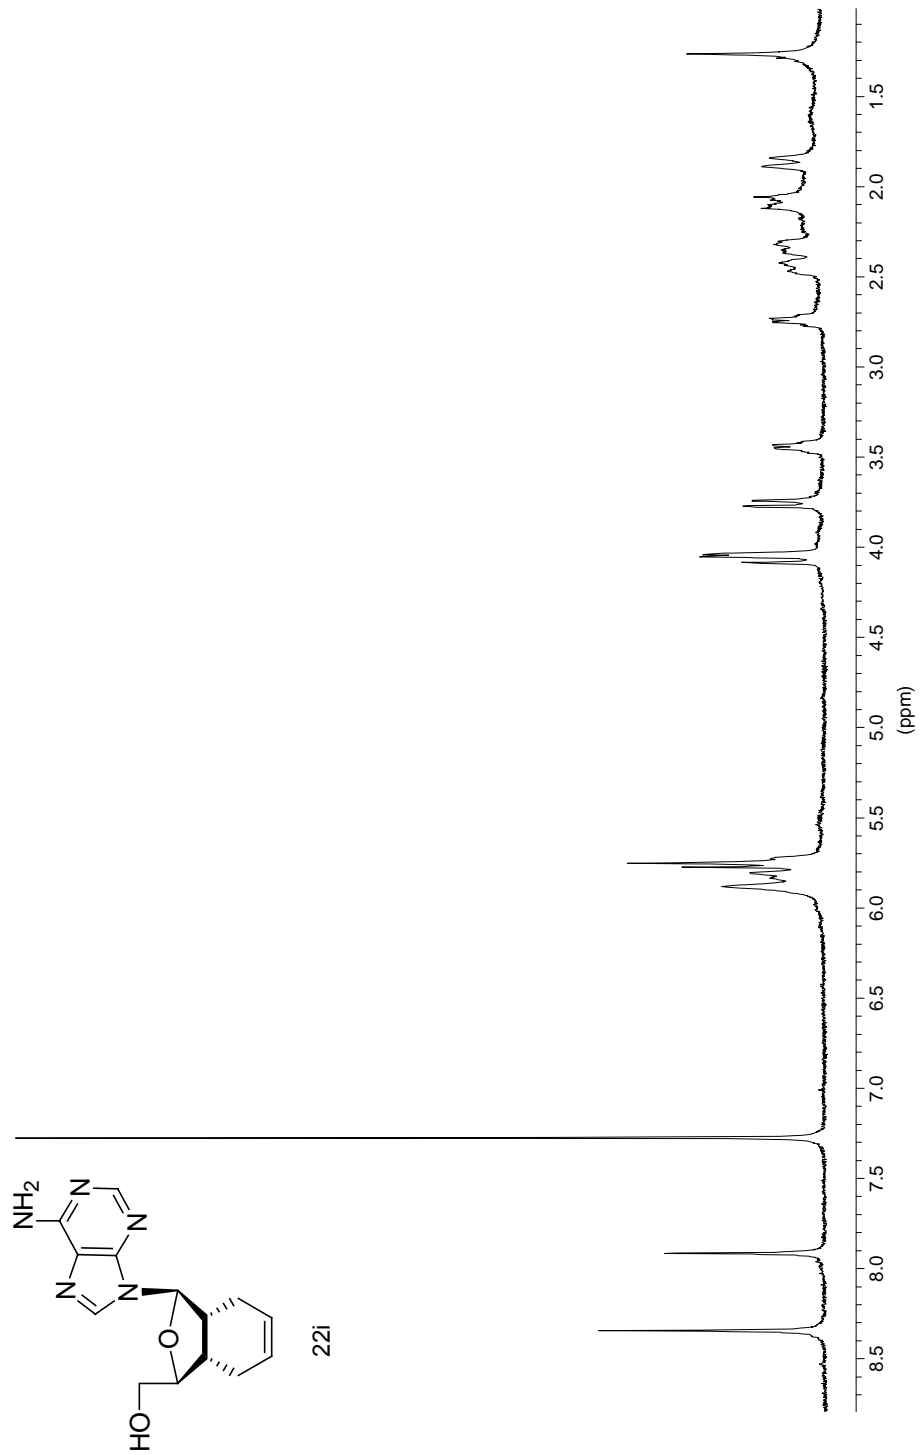



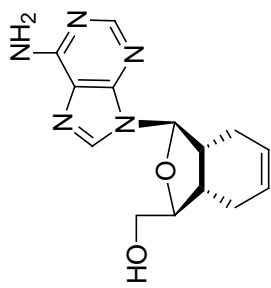

22i

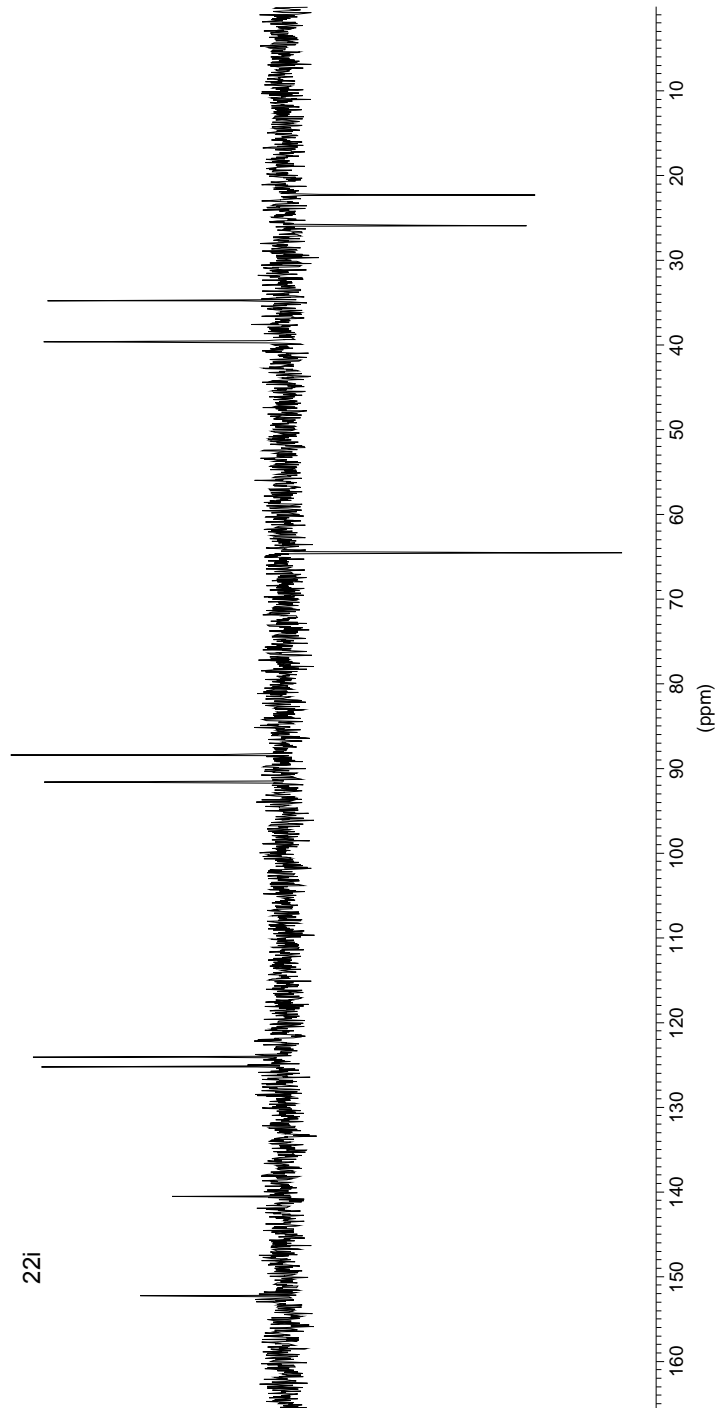

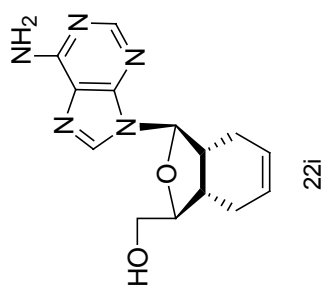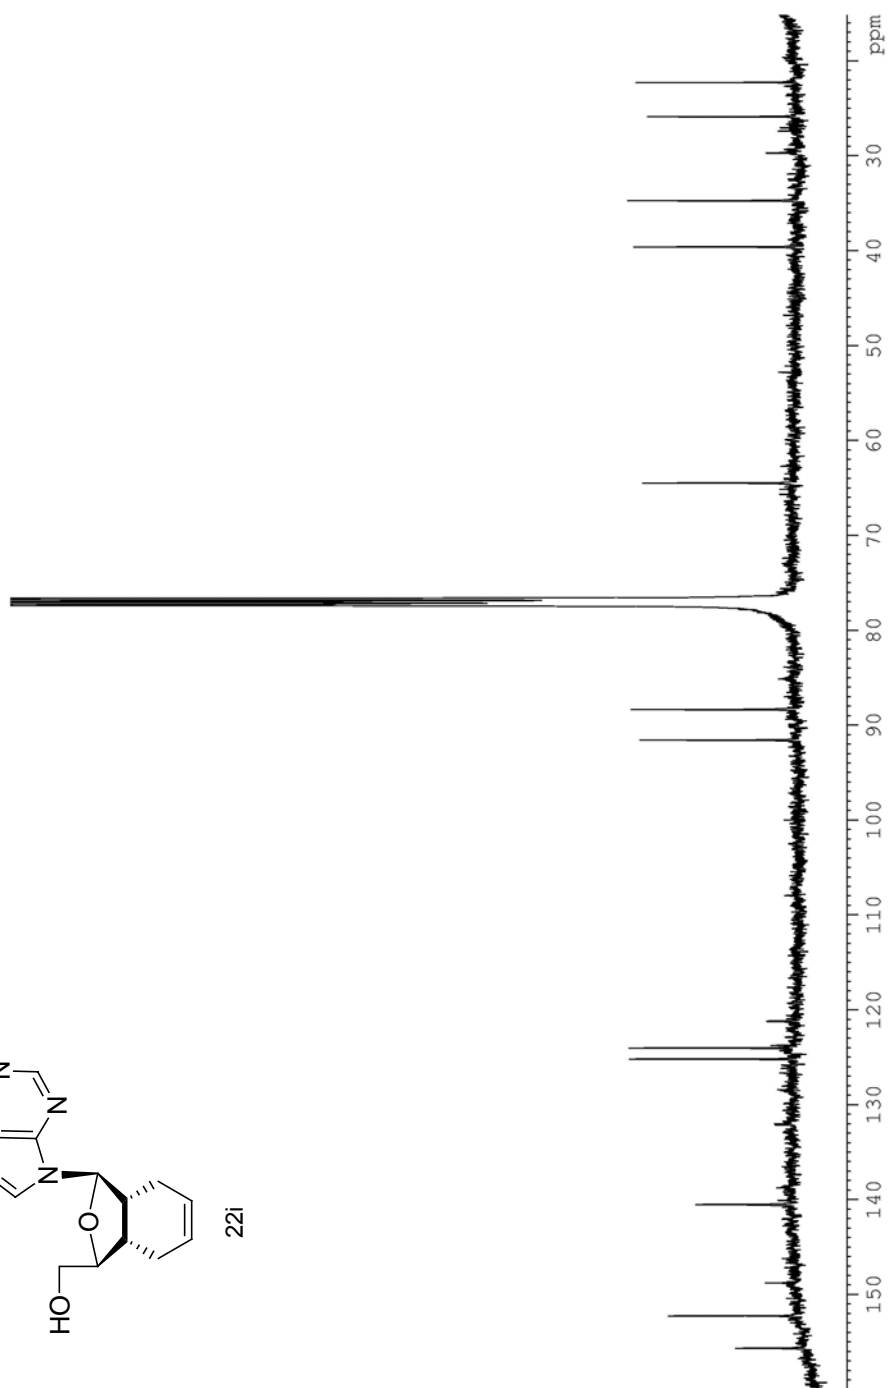

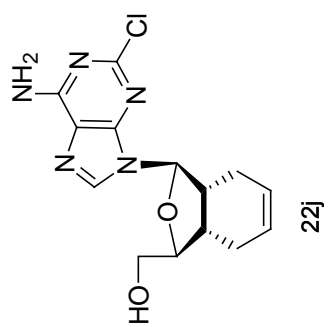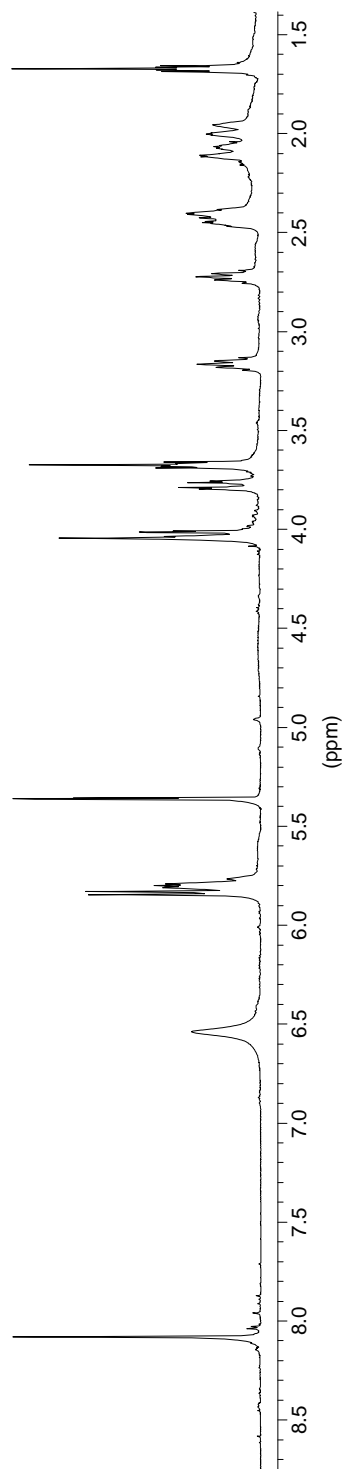

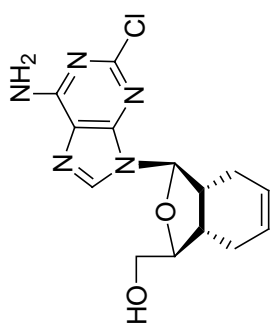

22j

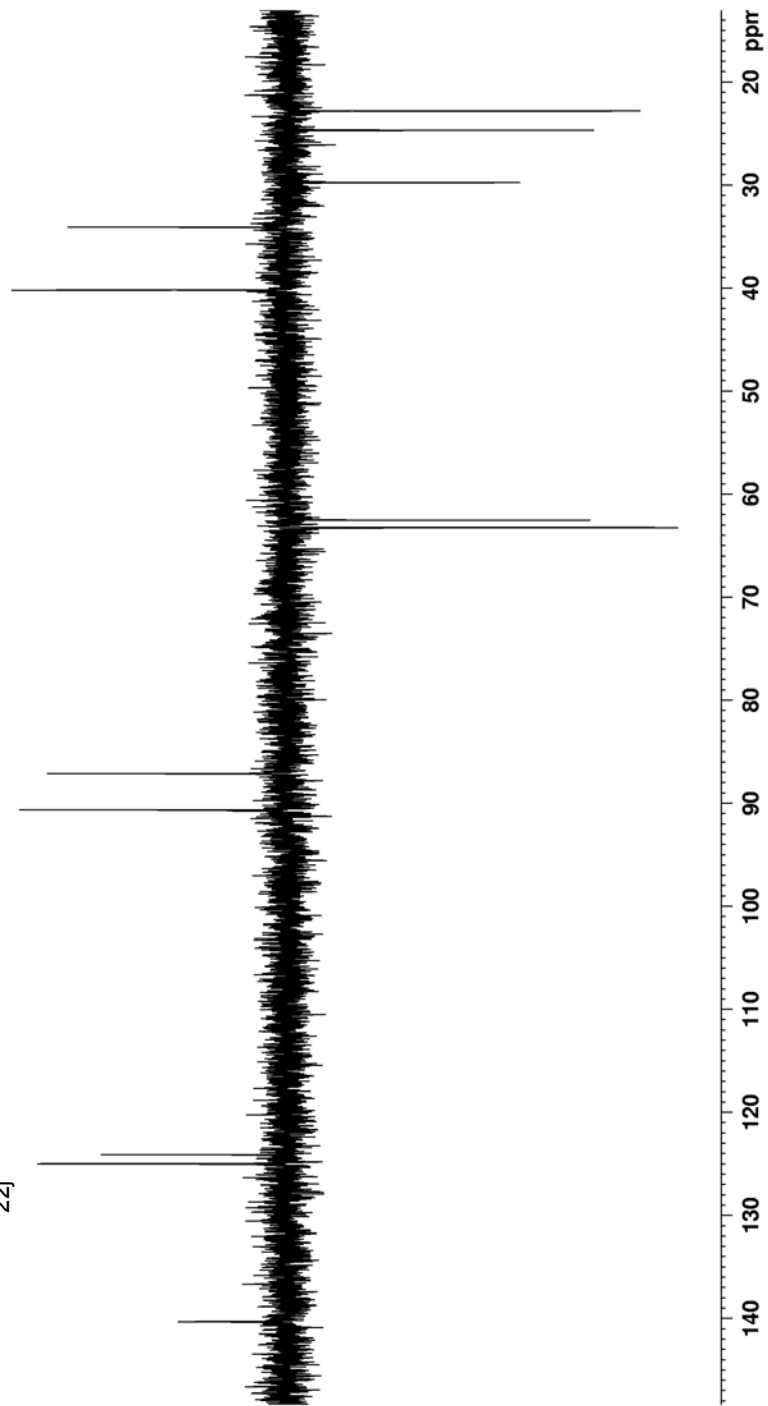

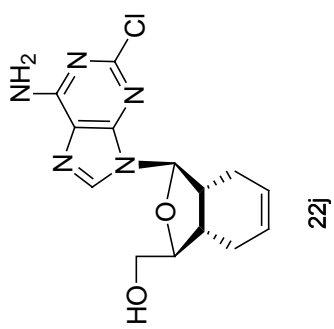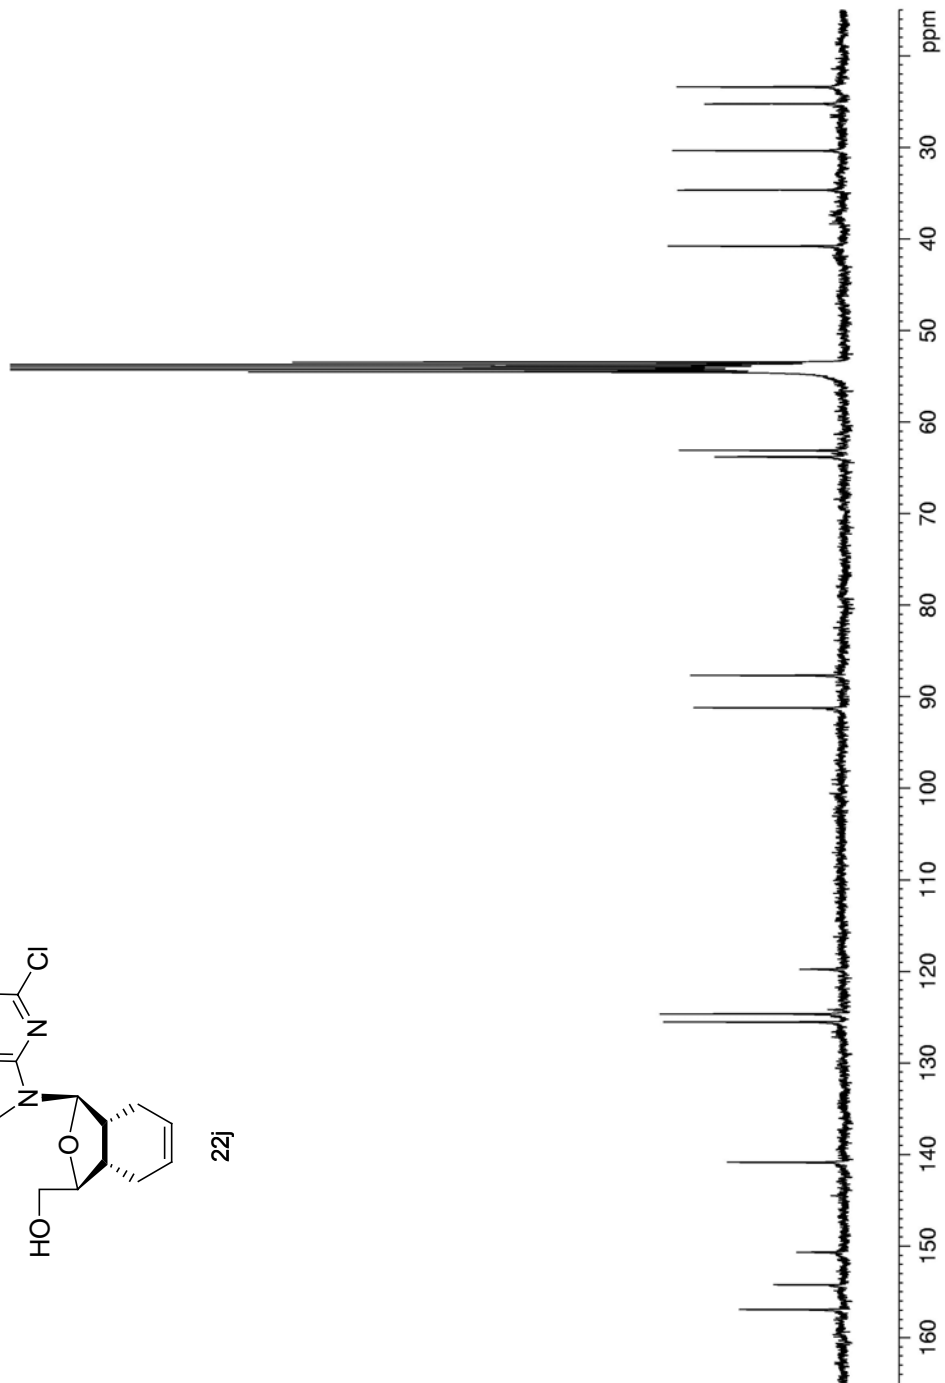

COSY

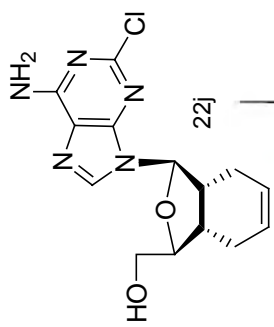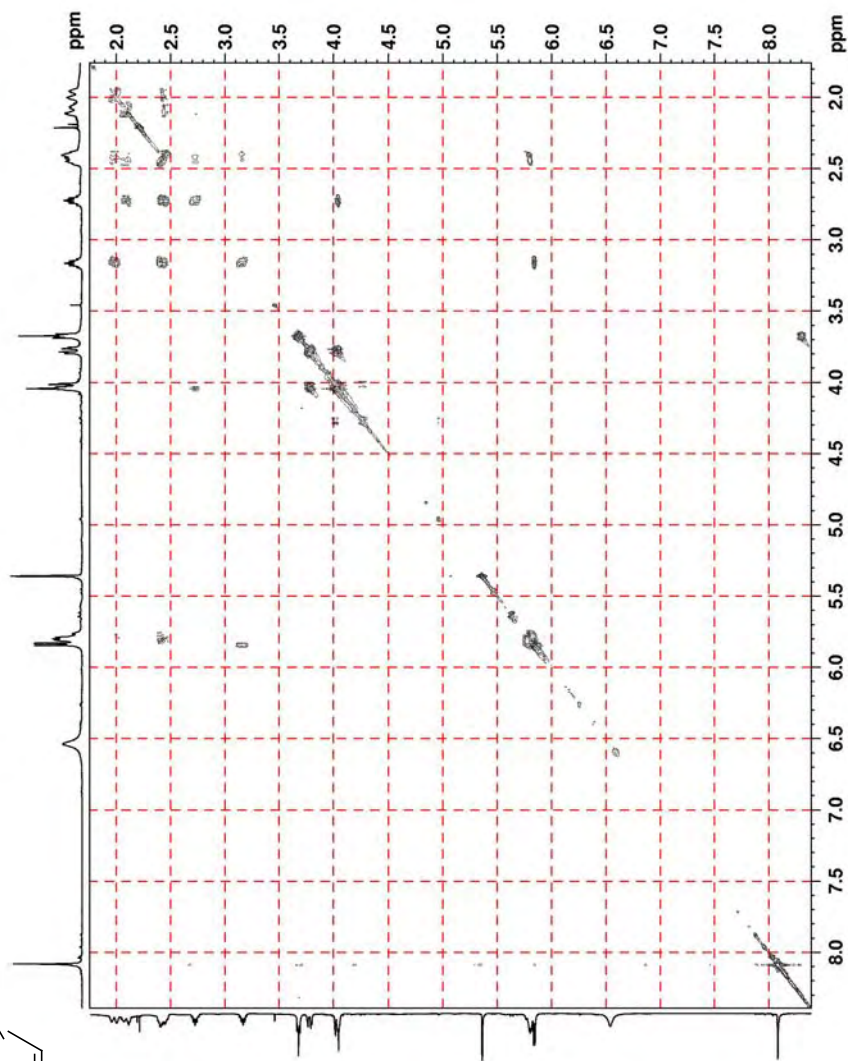

HSQC

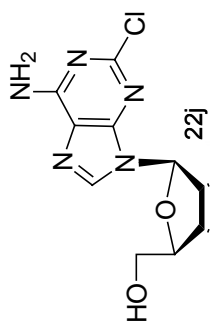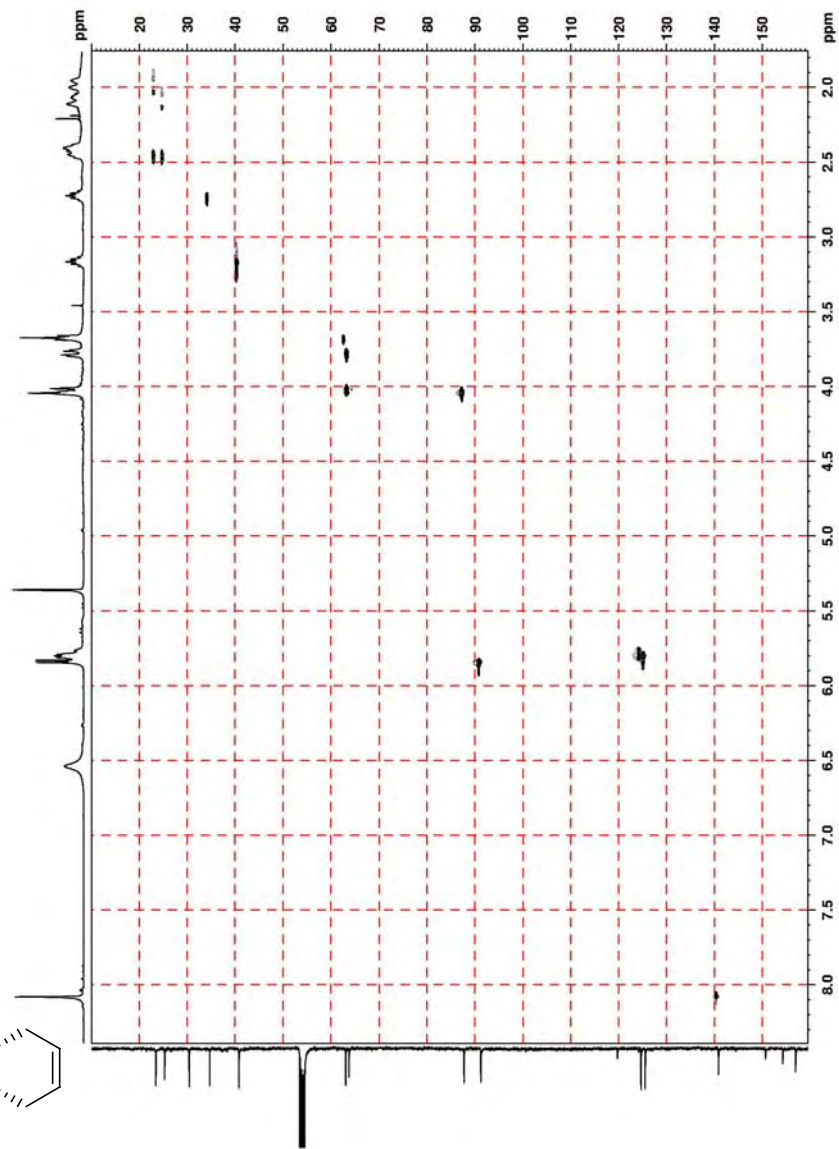

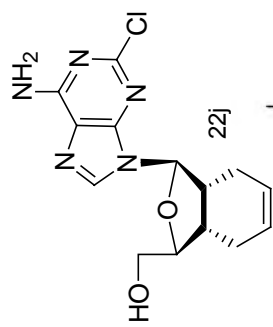

HMBC

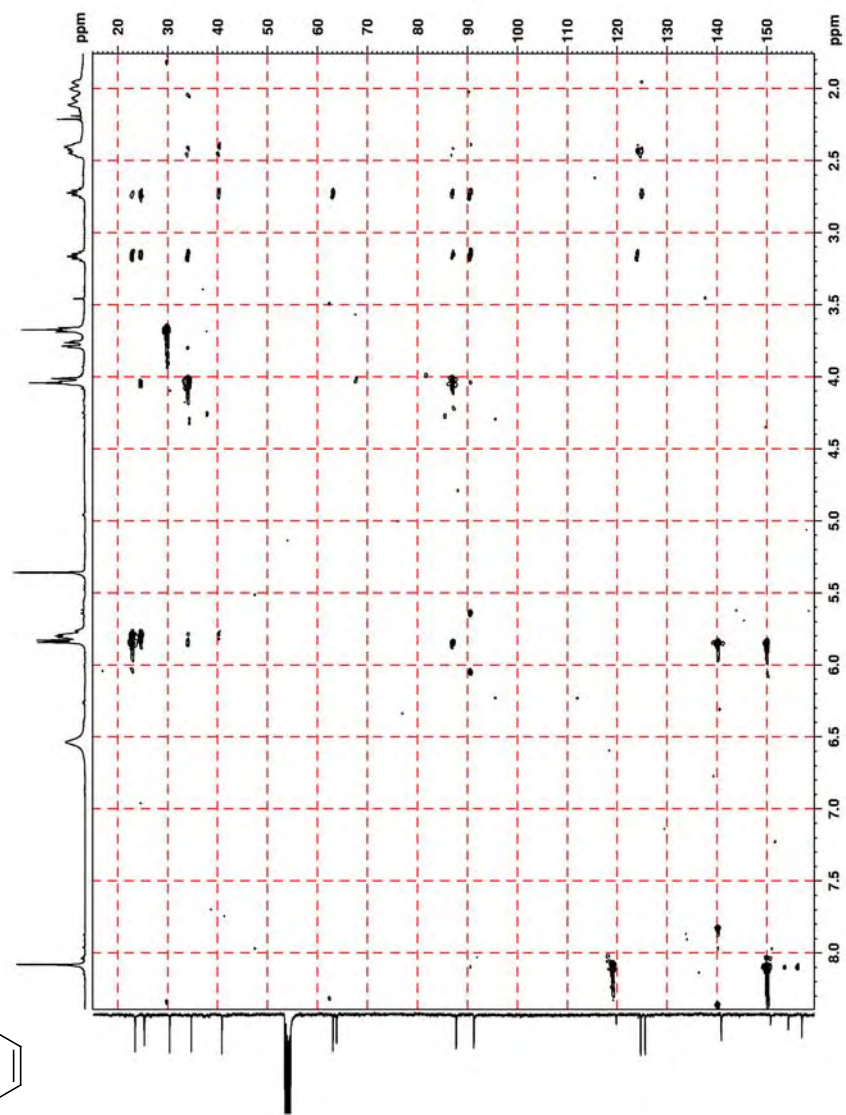



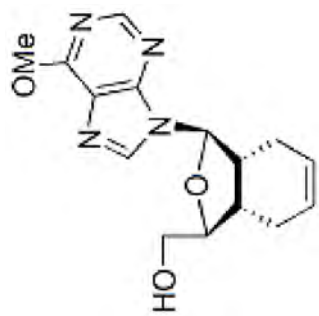

22k

S89

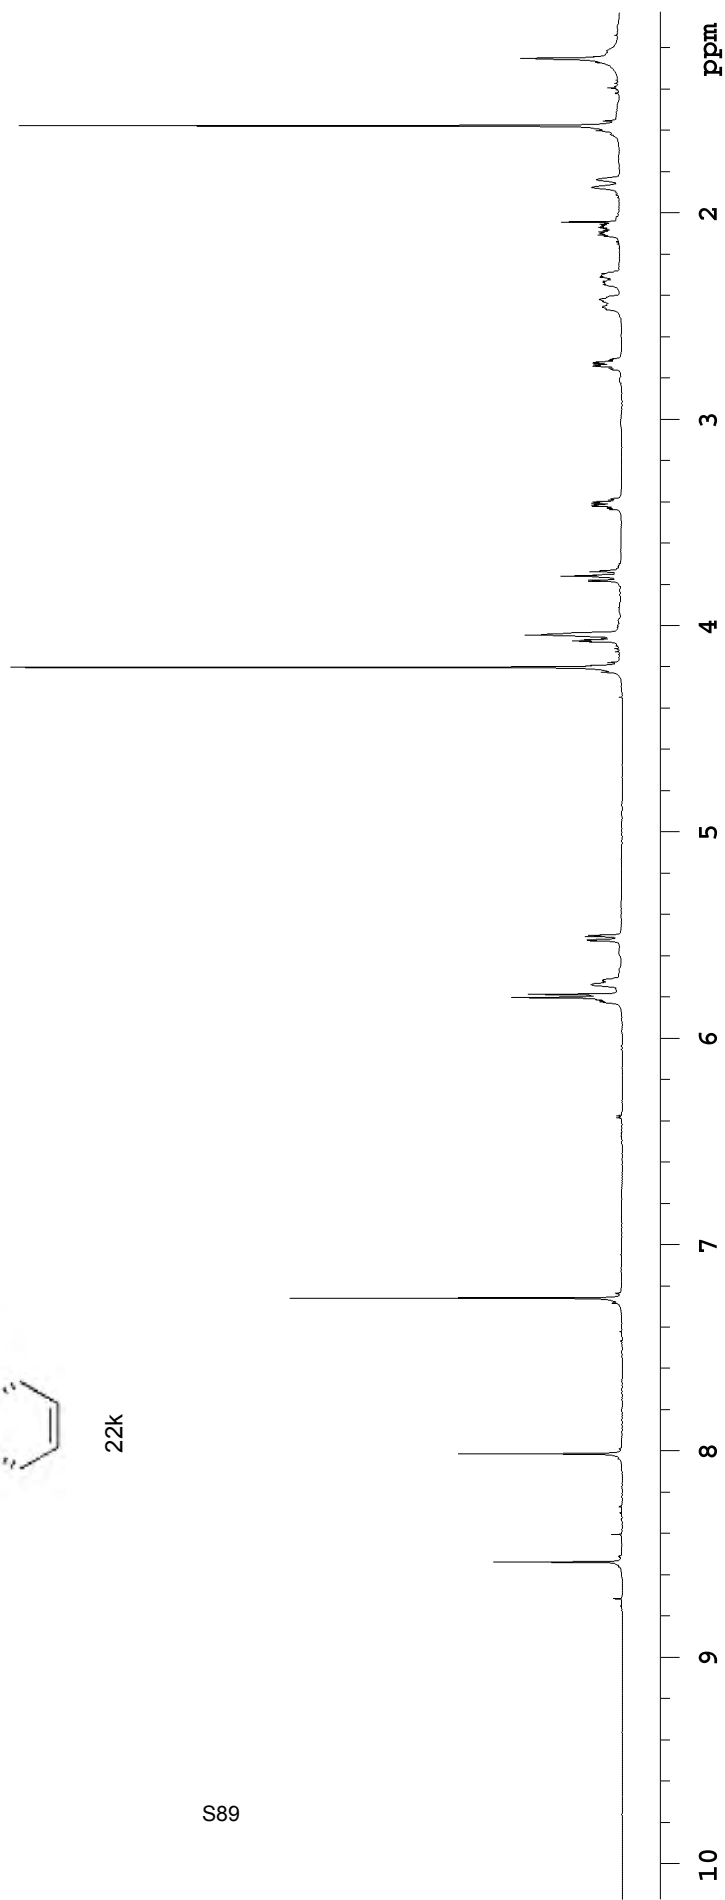

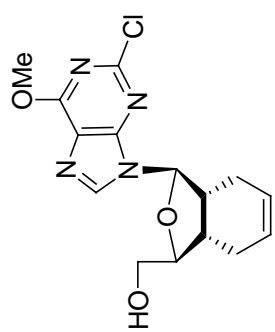

221

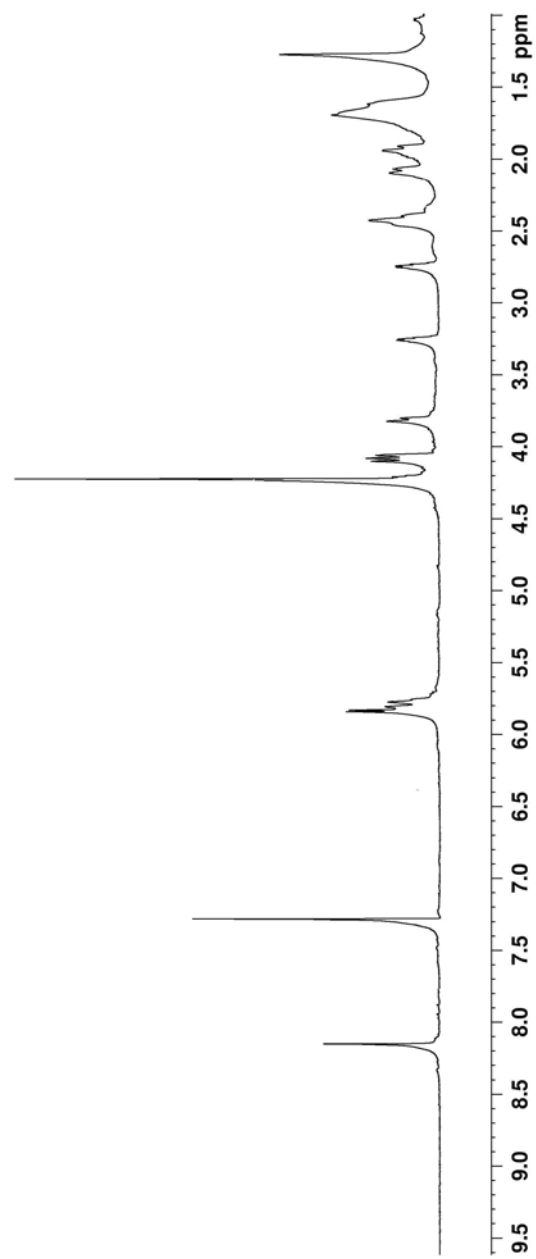

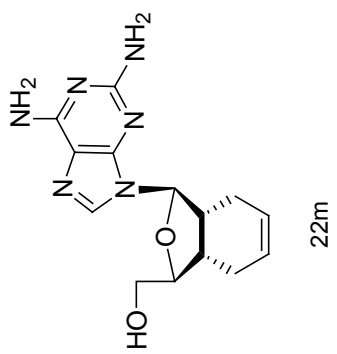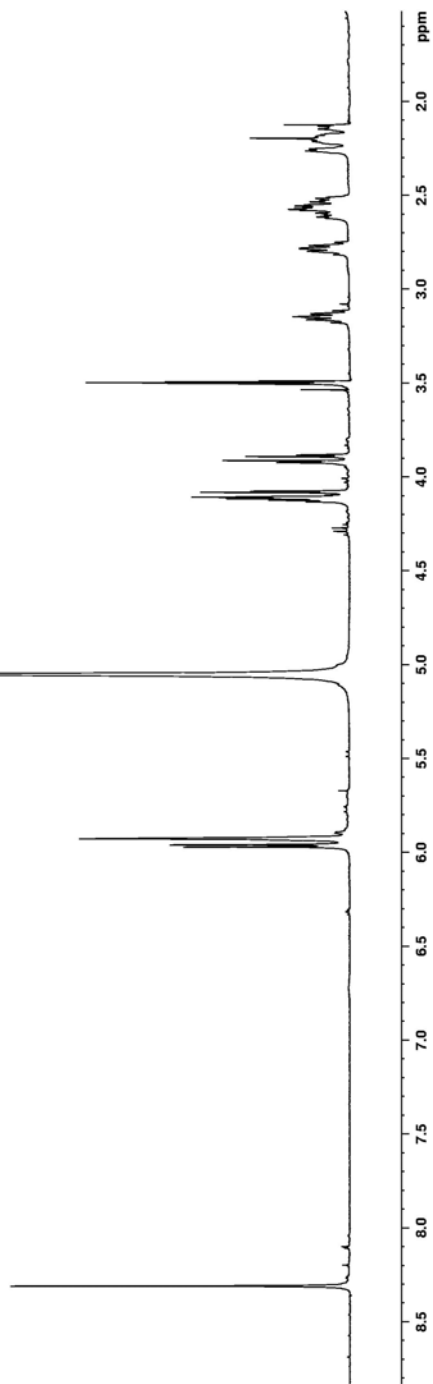

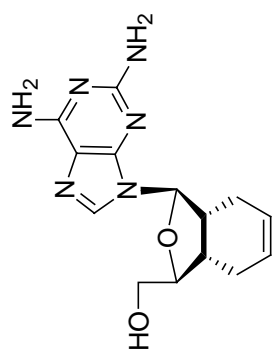

22m

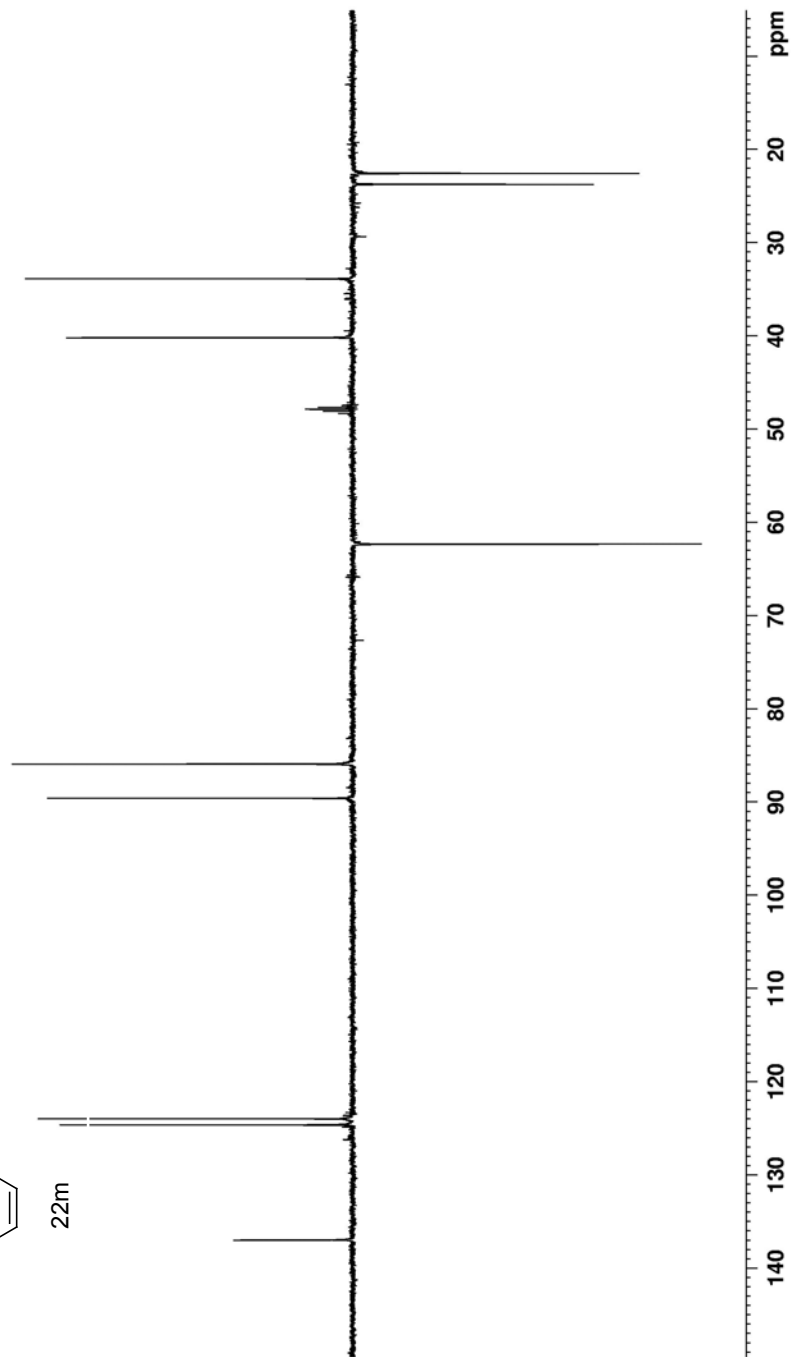

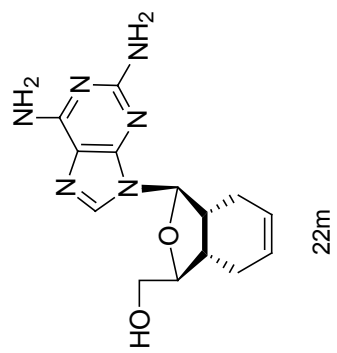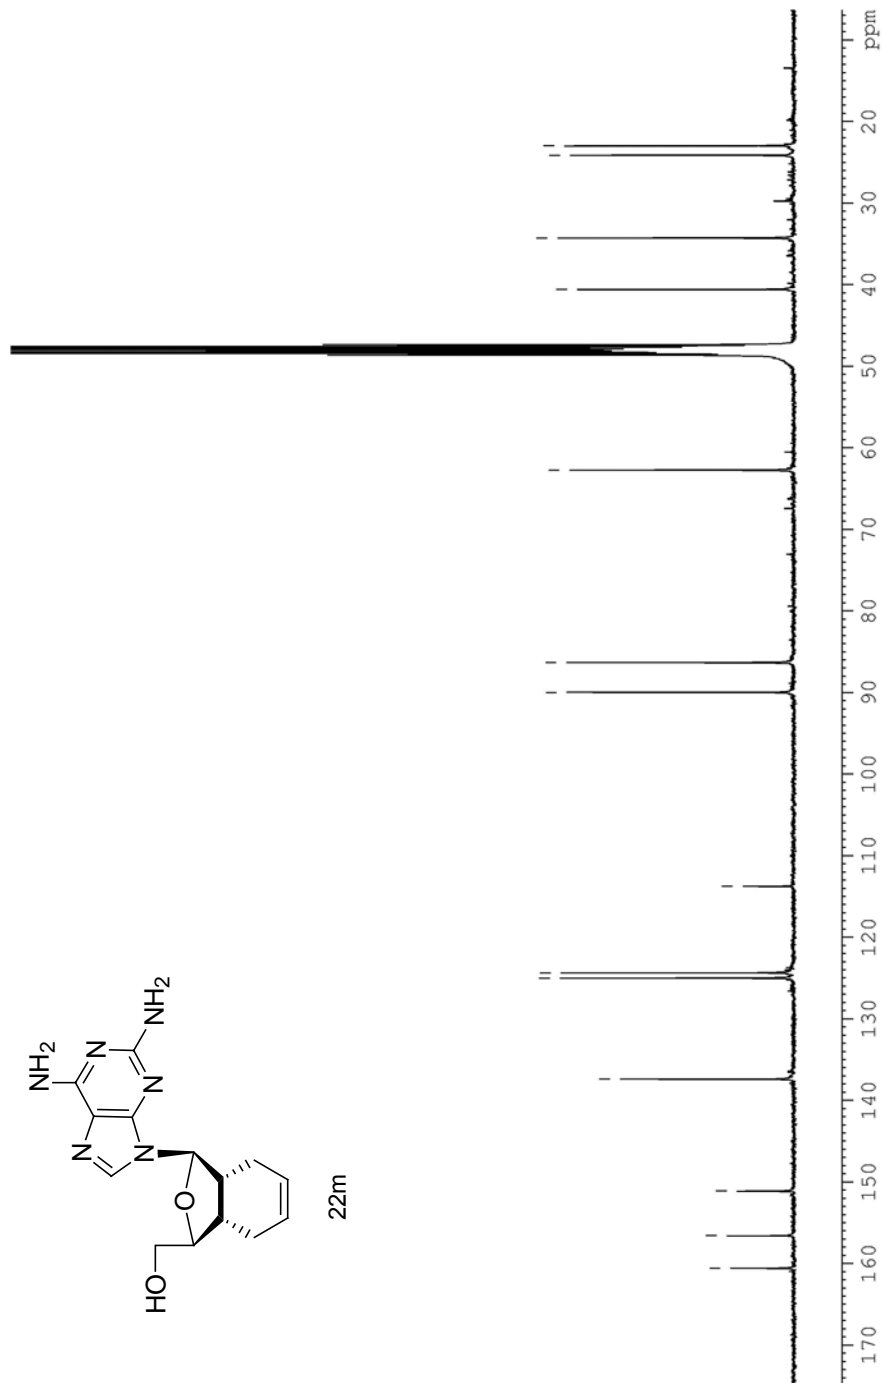

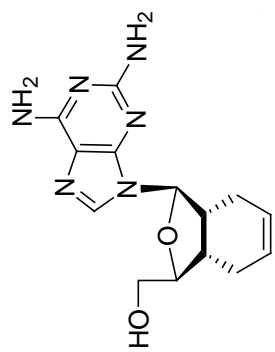

22m

COSY

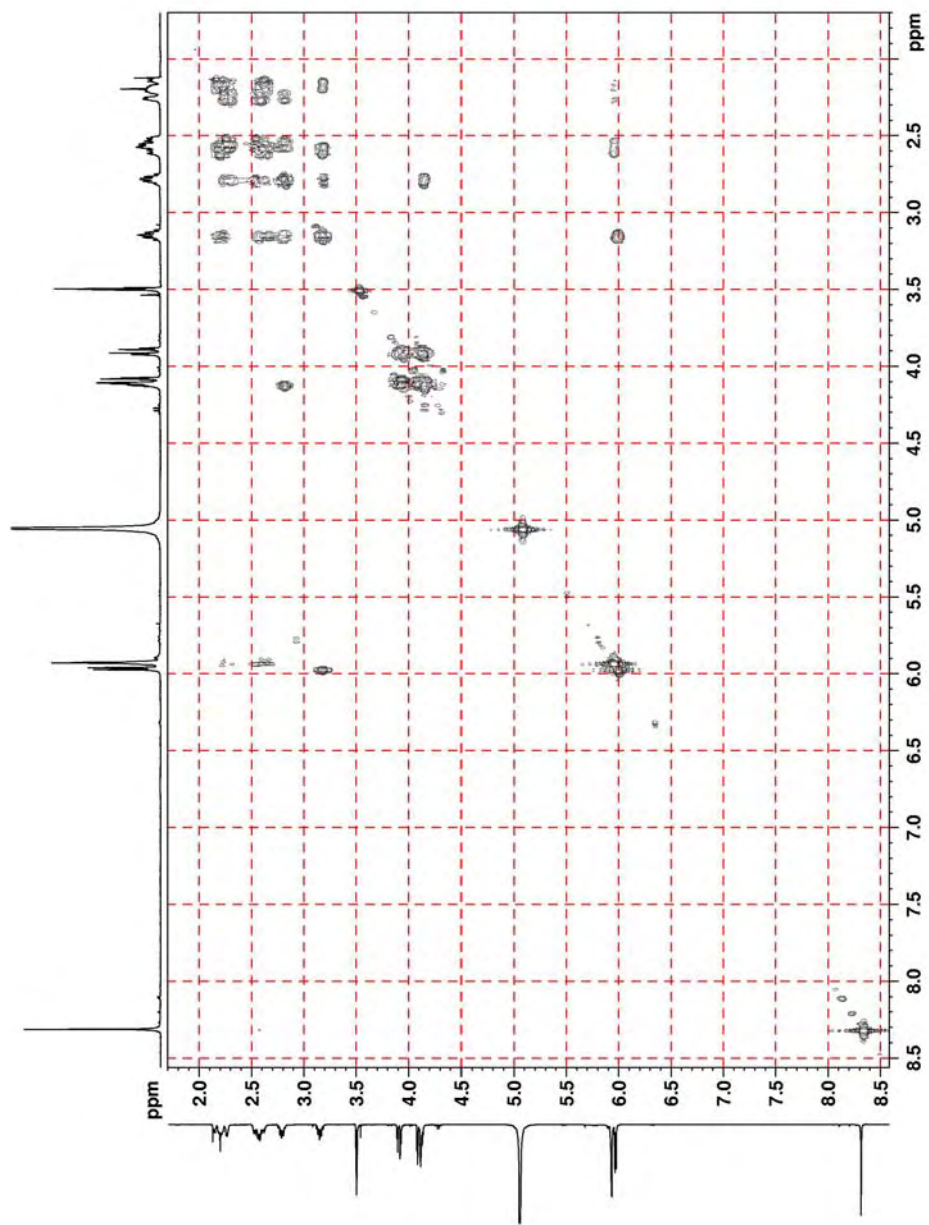

HSQC

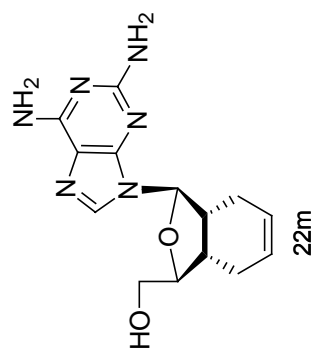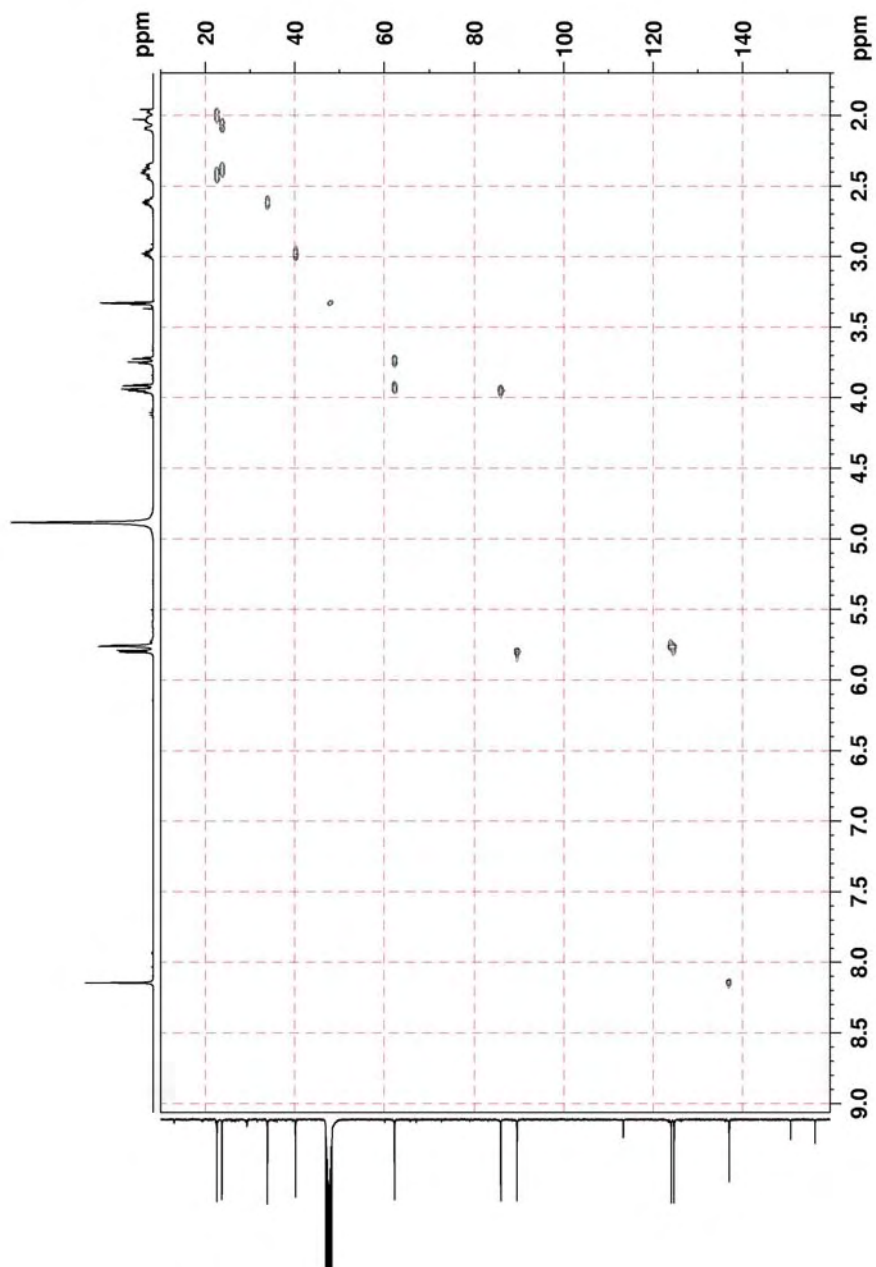

HMBC

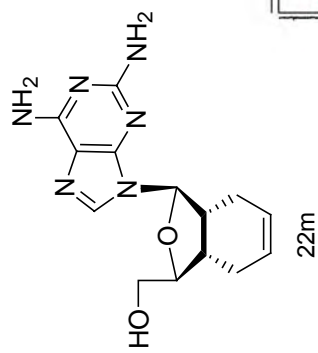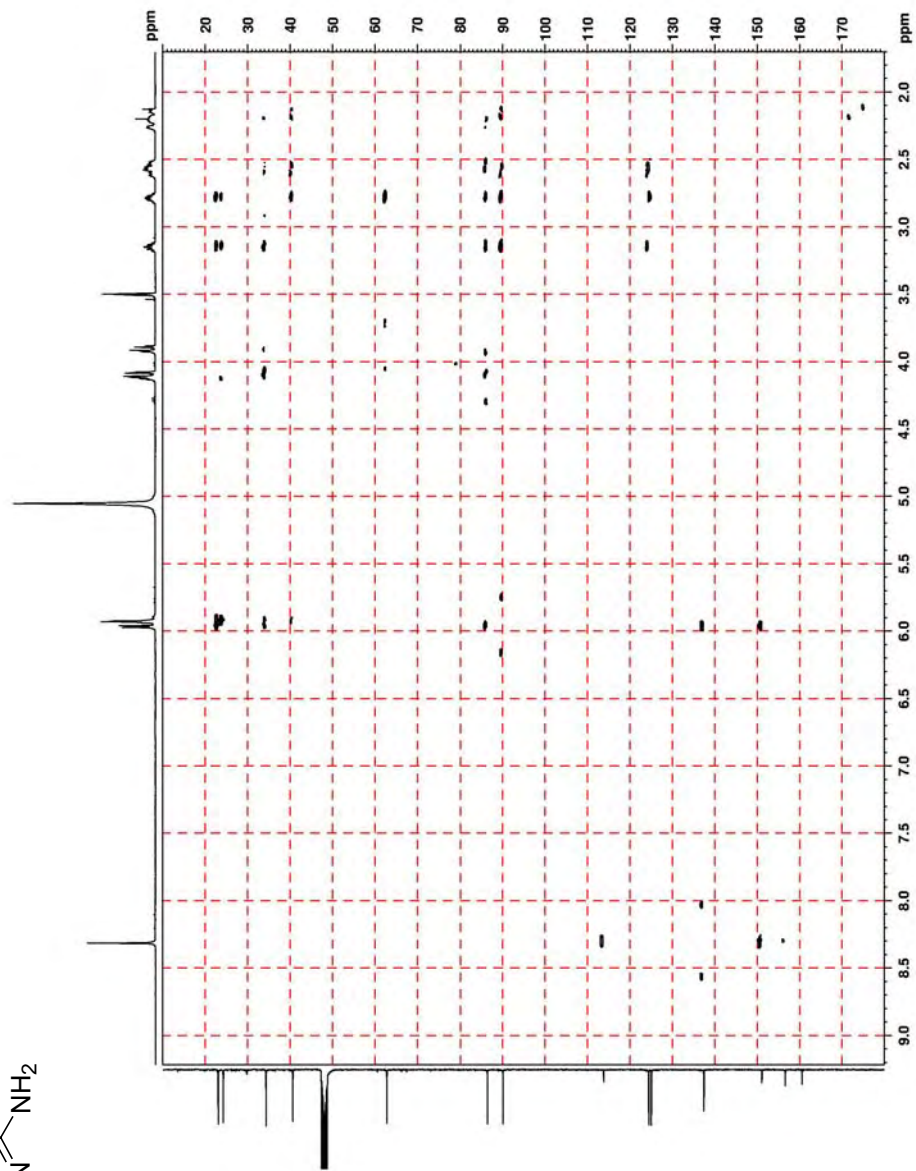



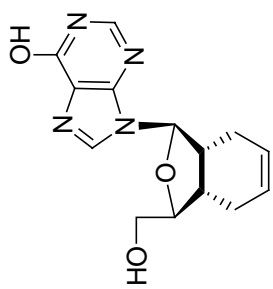

220

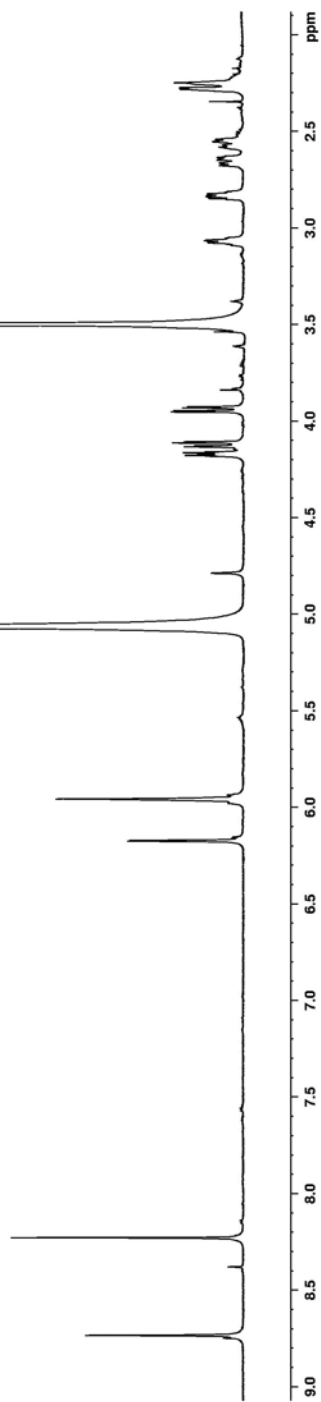

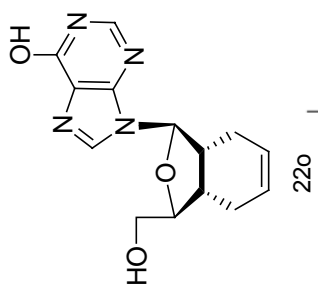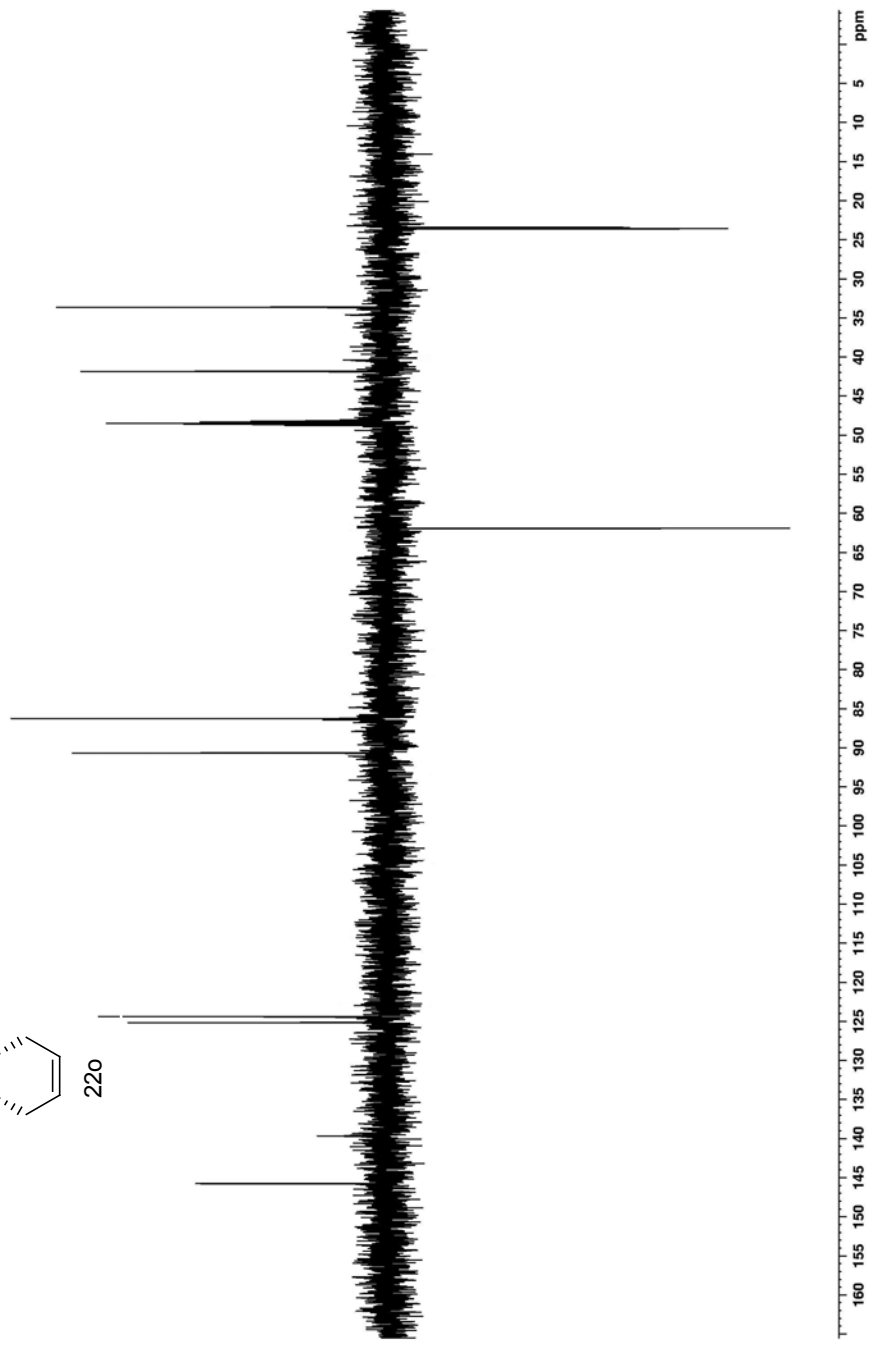

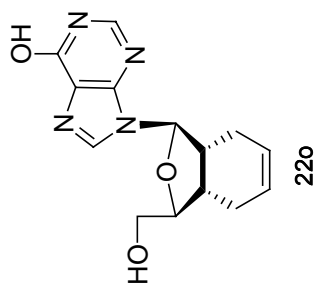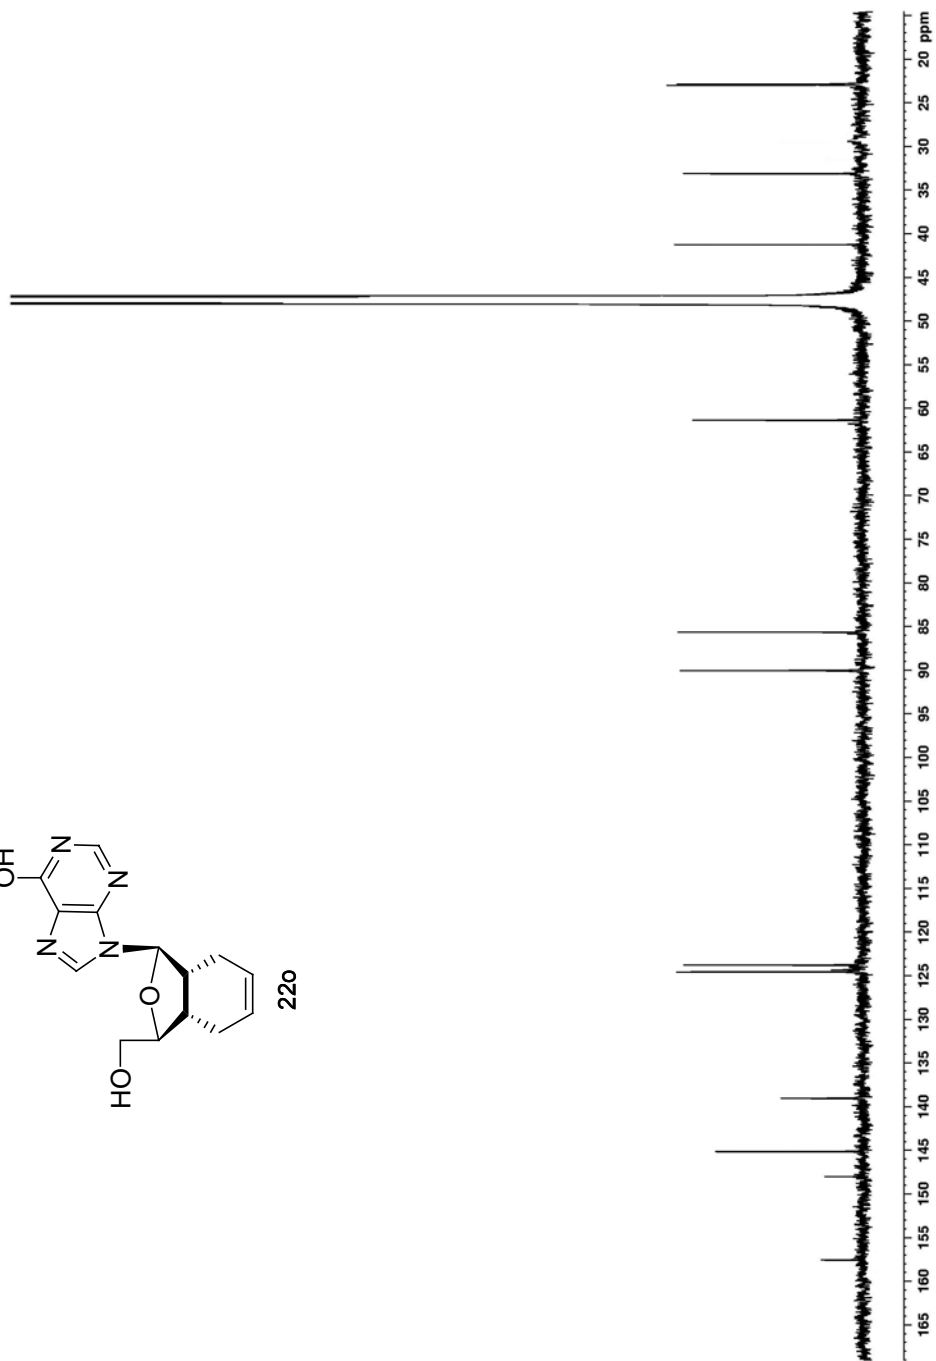

COSY

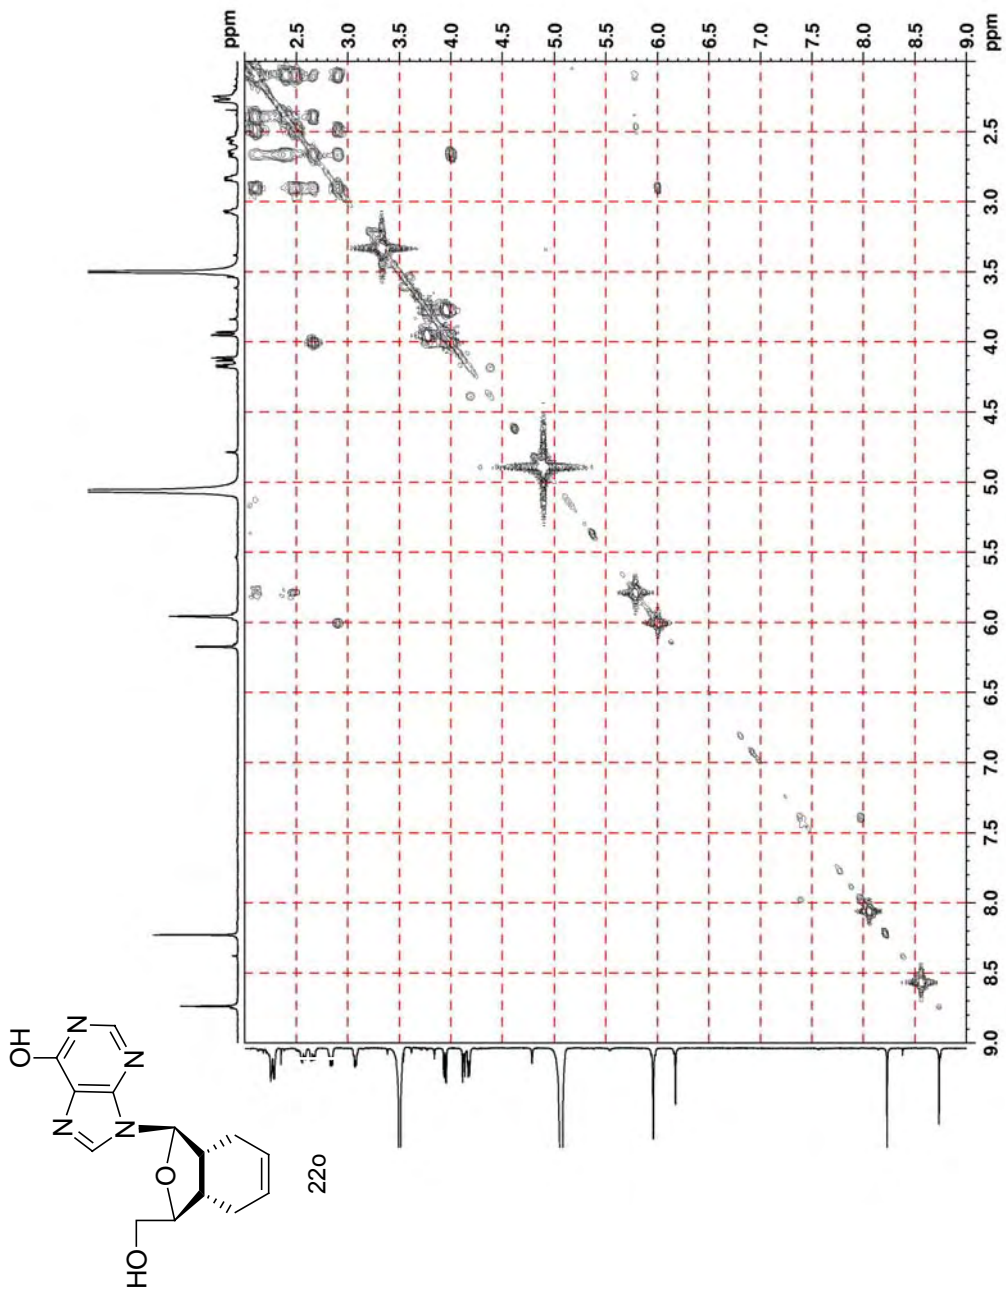

HSQC

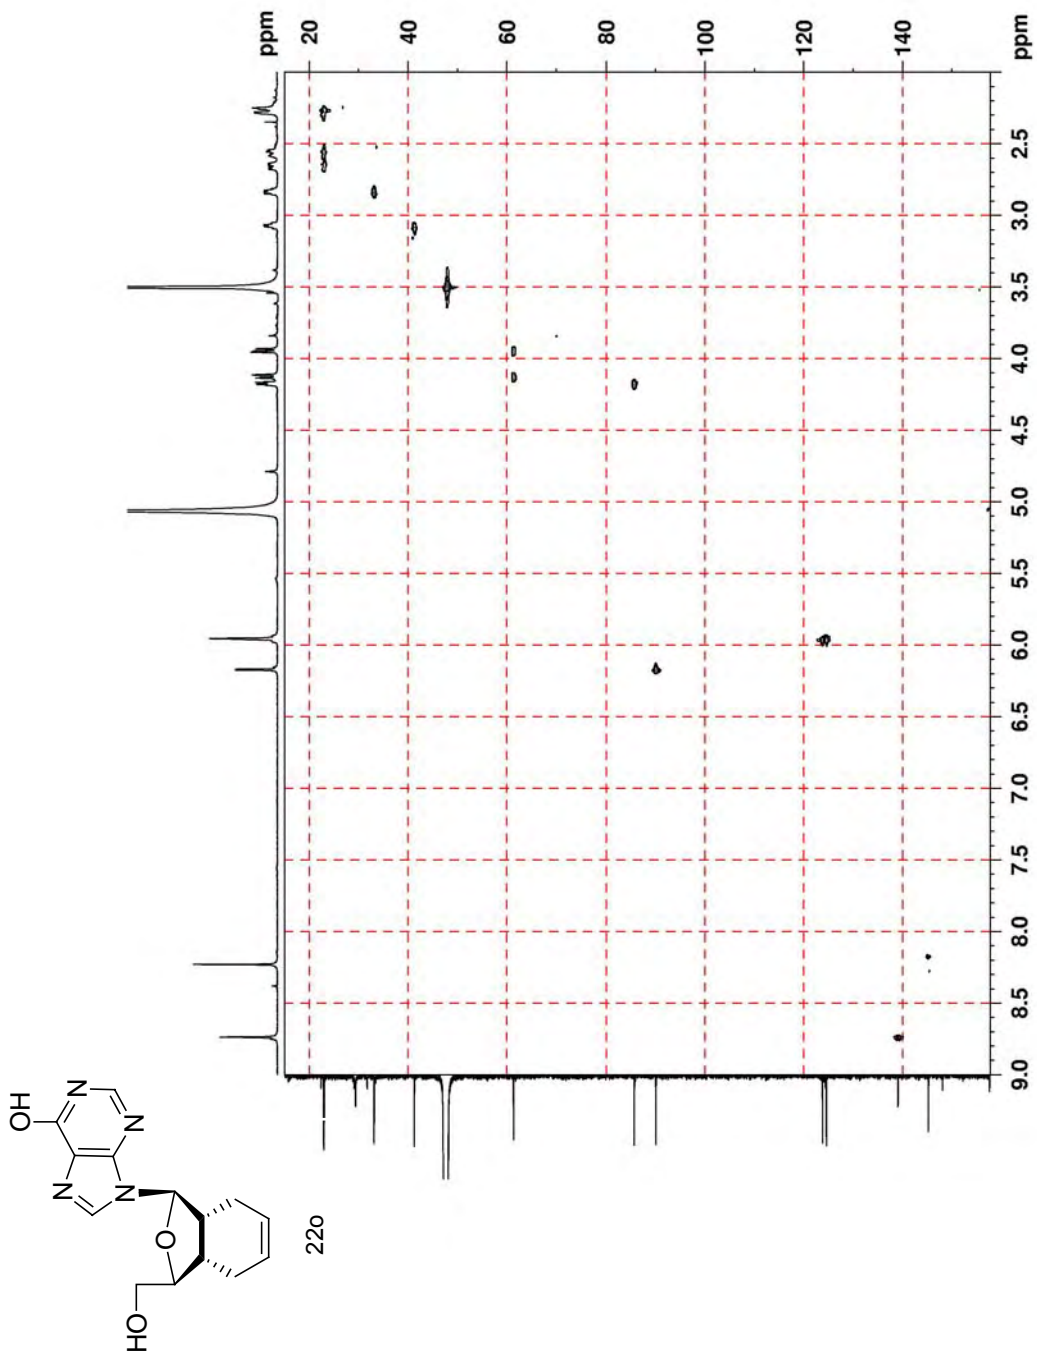

HMBC

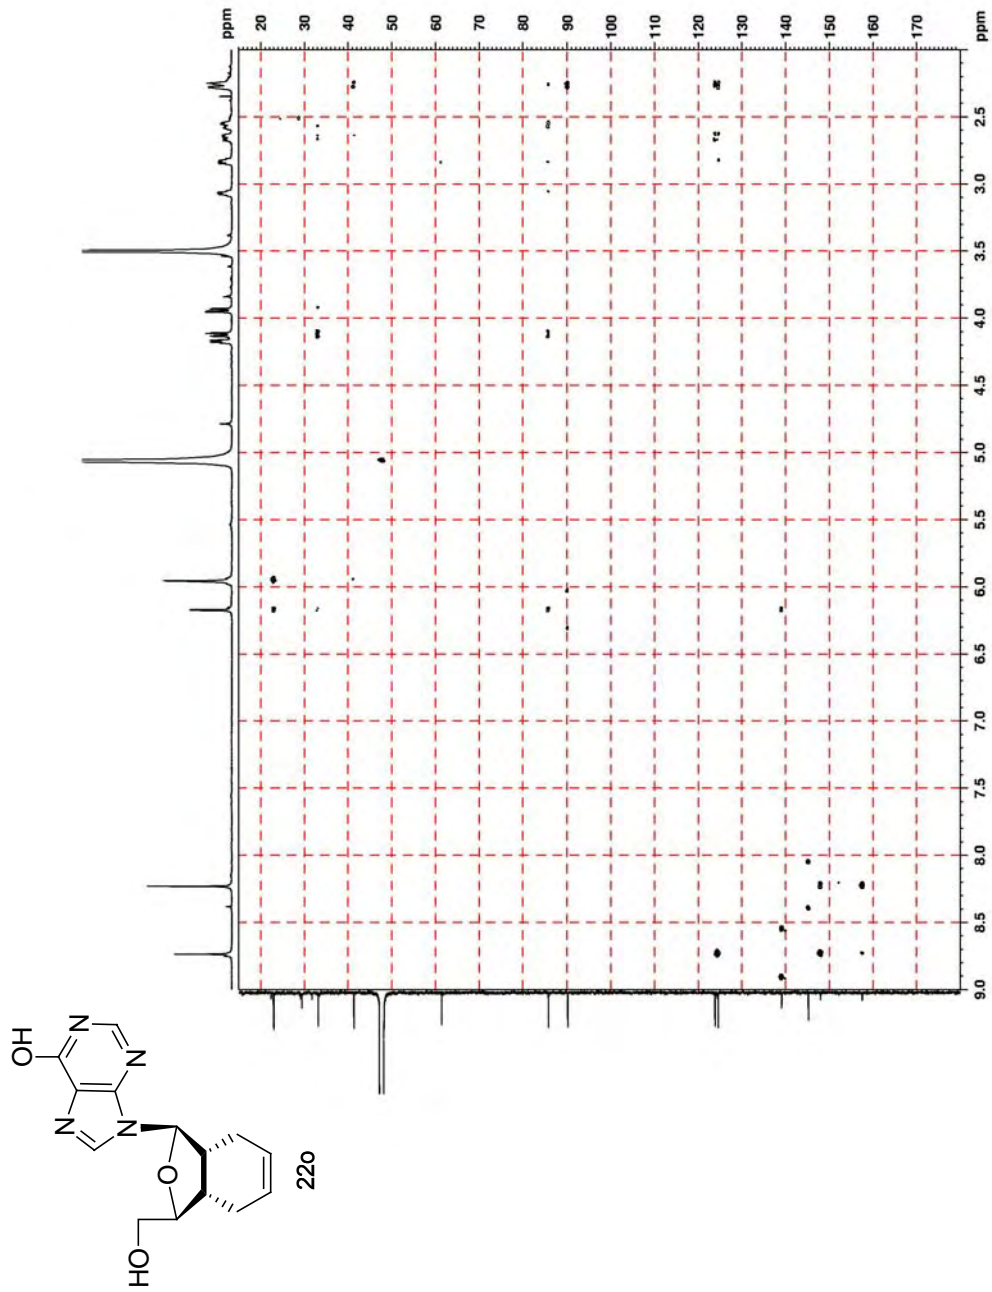

NOESY

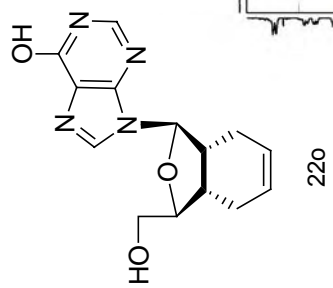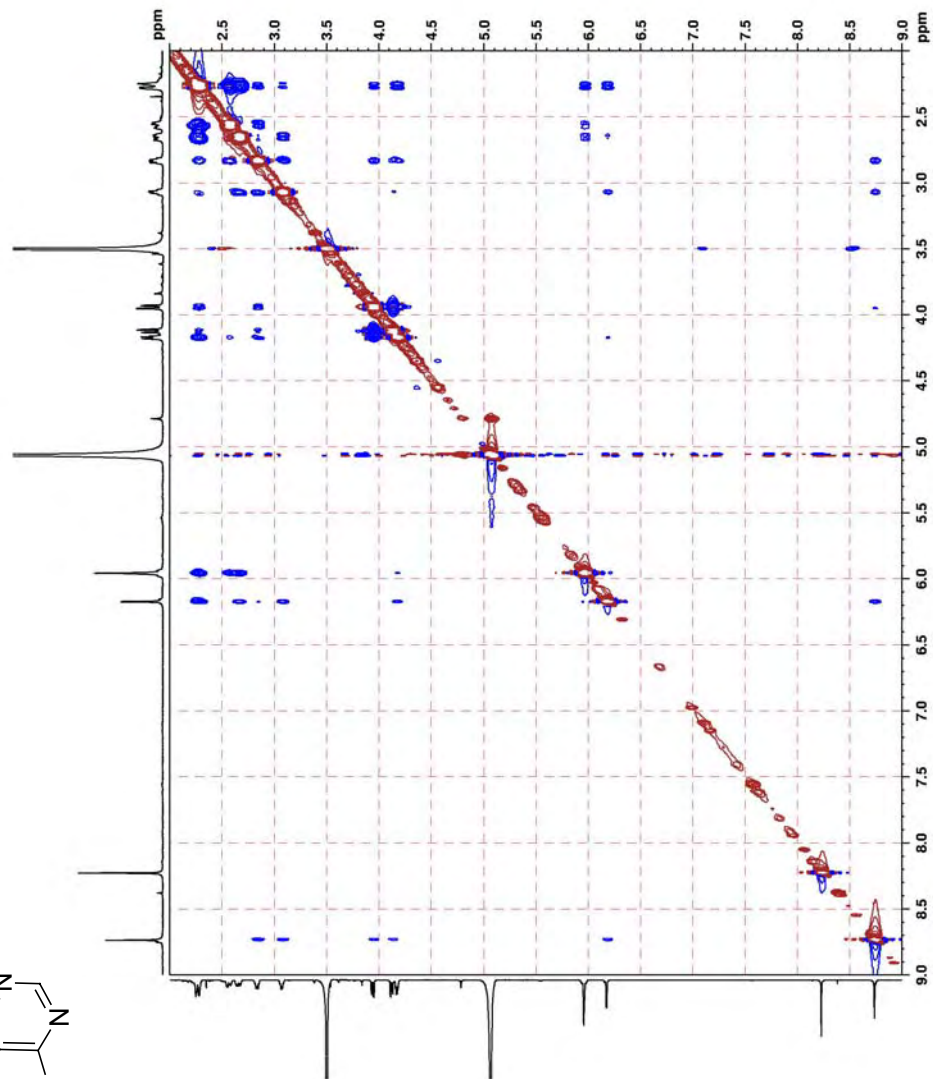

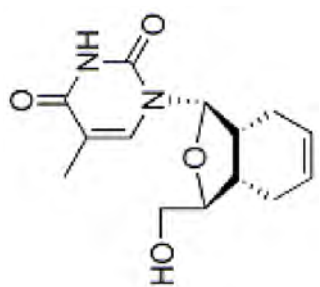

23b

S104

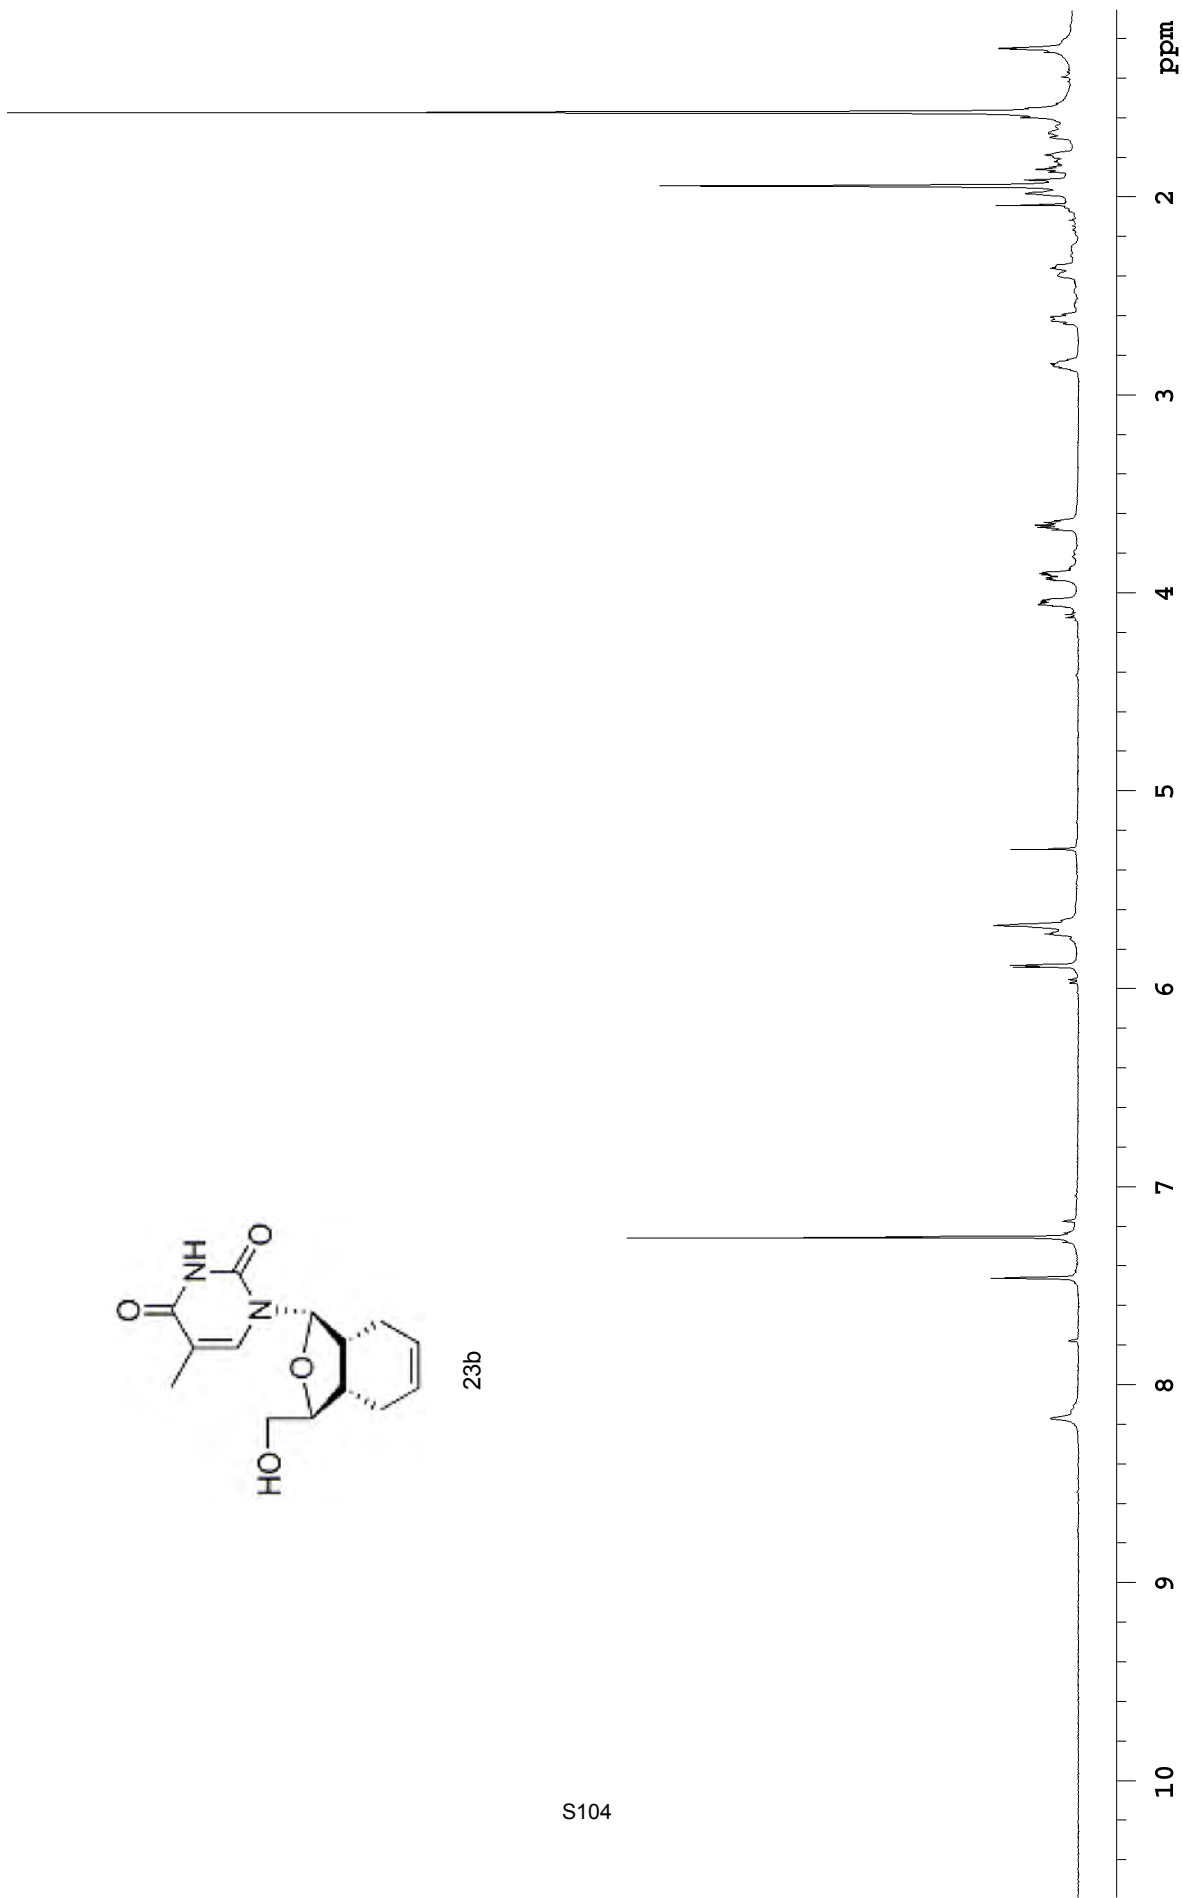



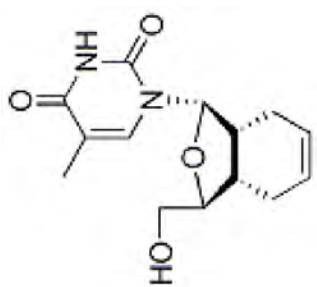

23b

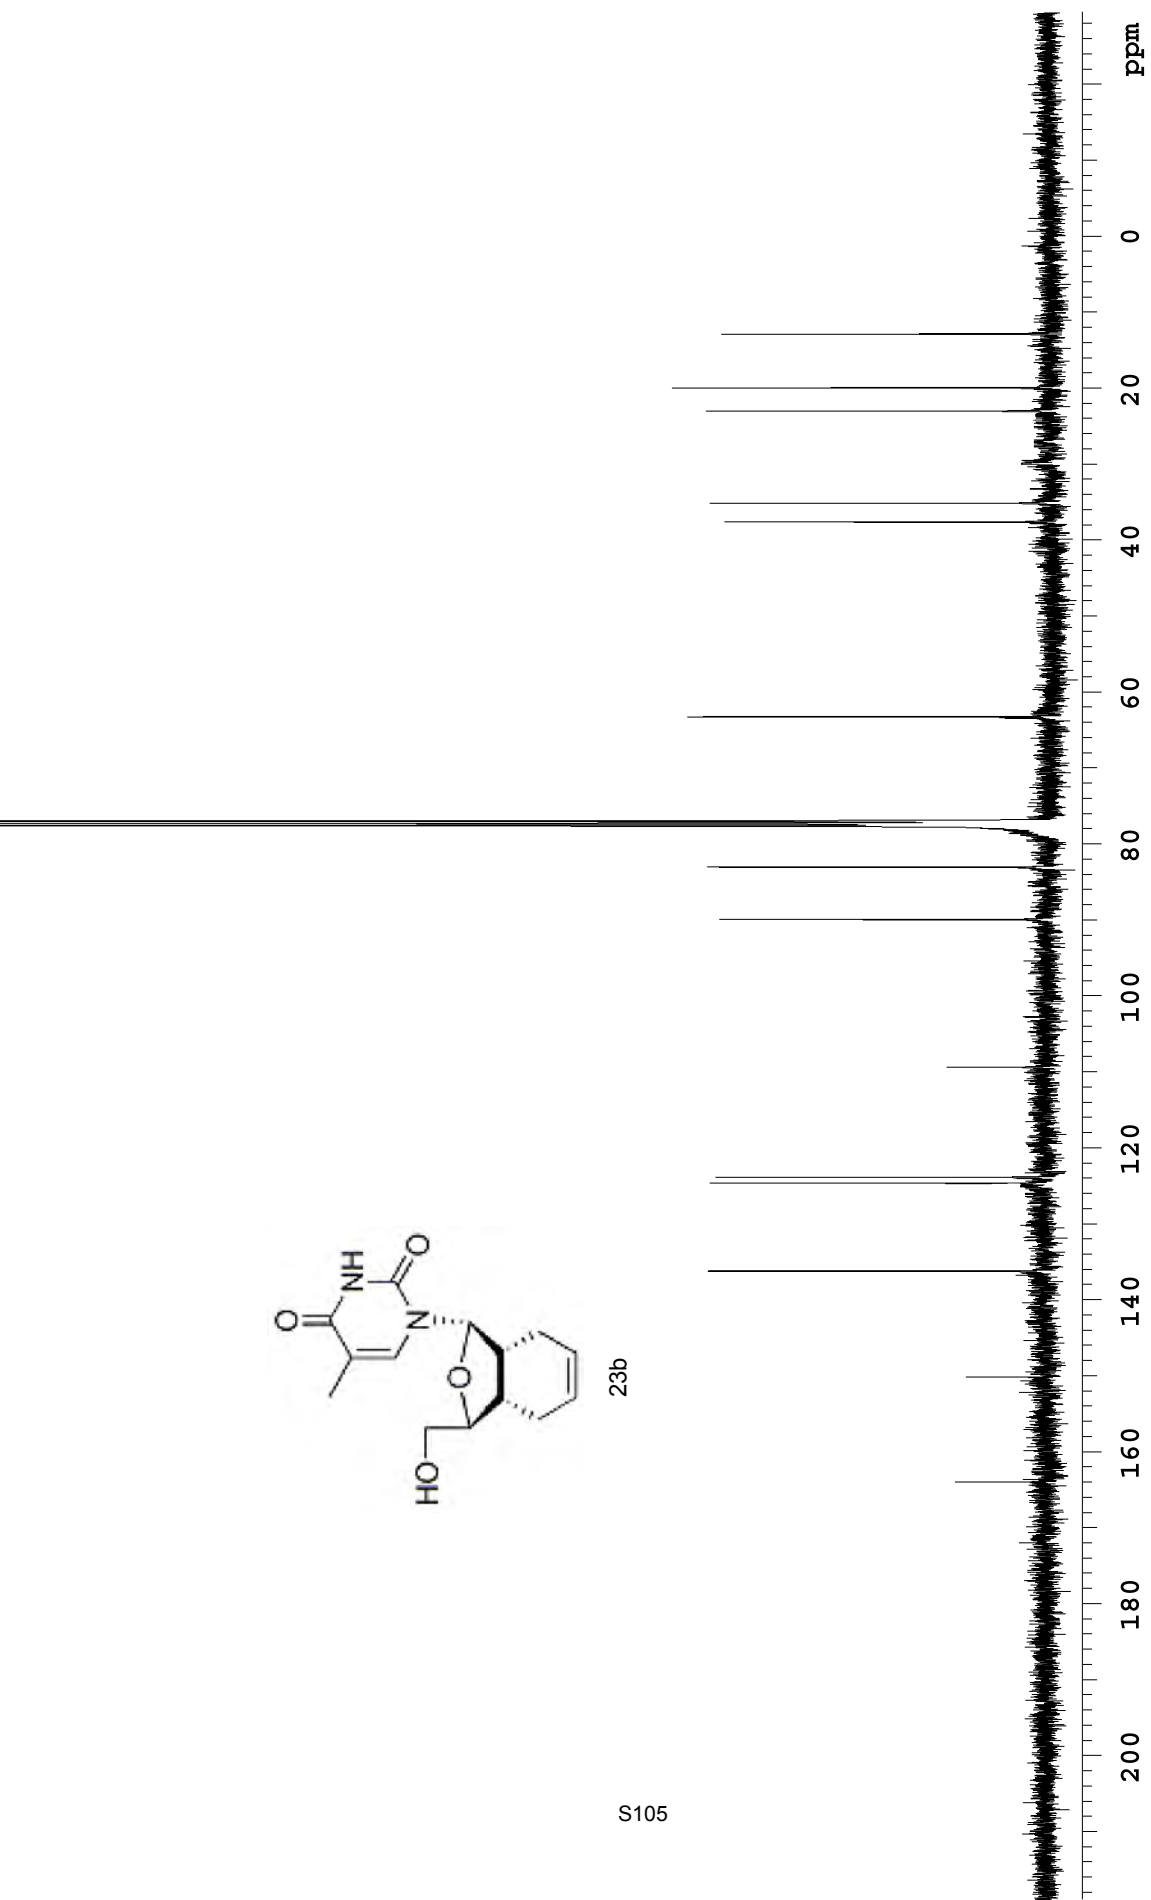

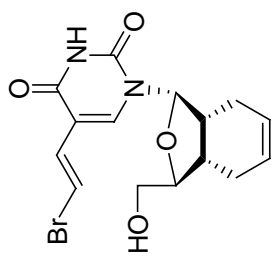

23d

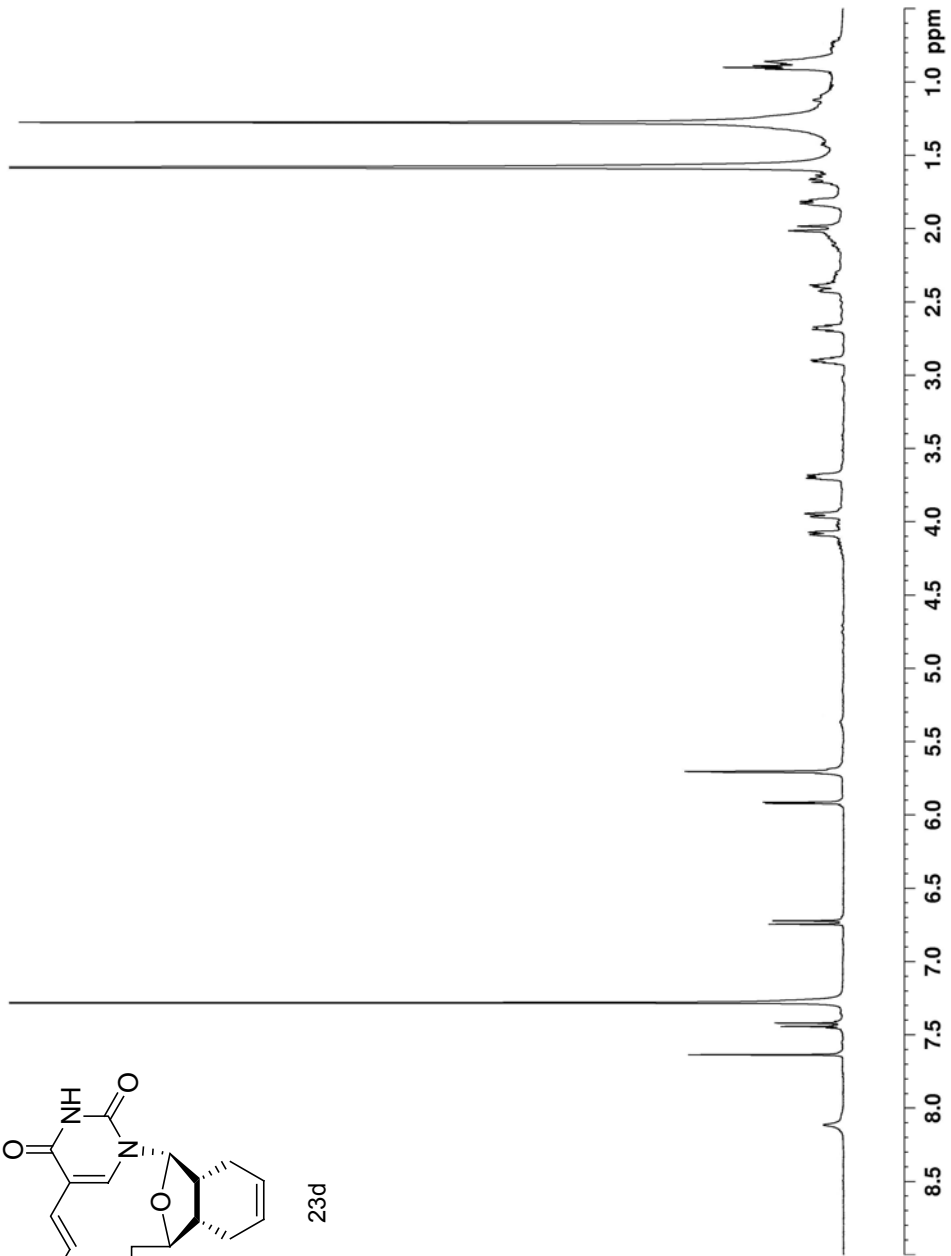

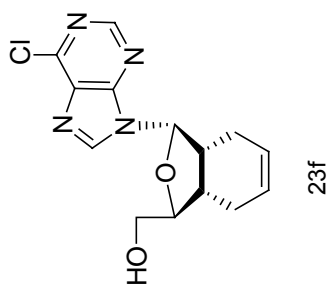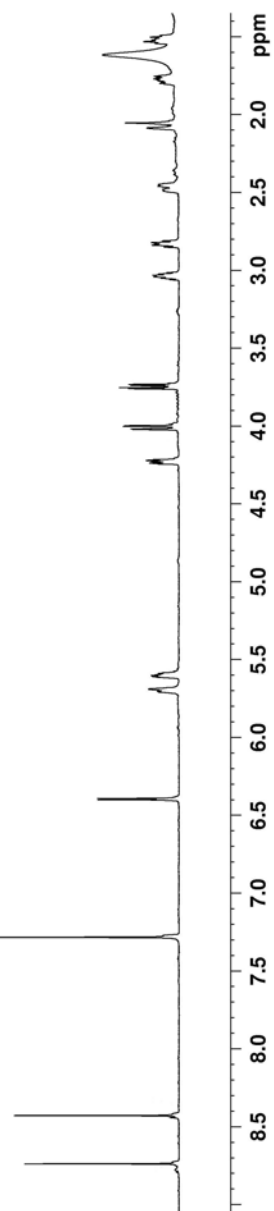

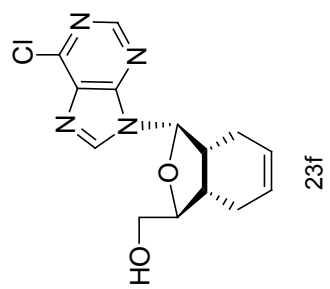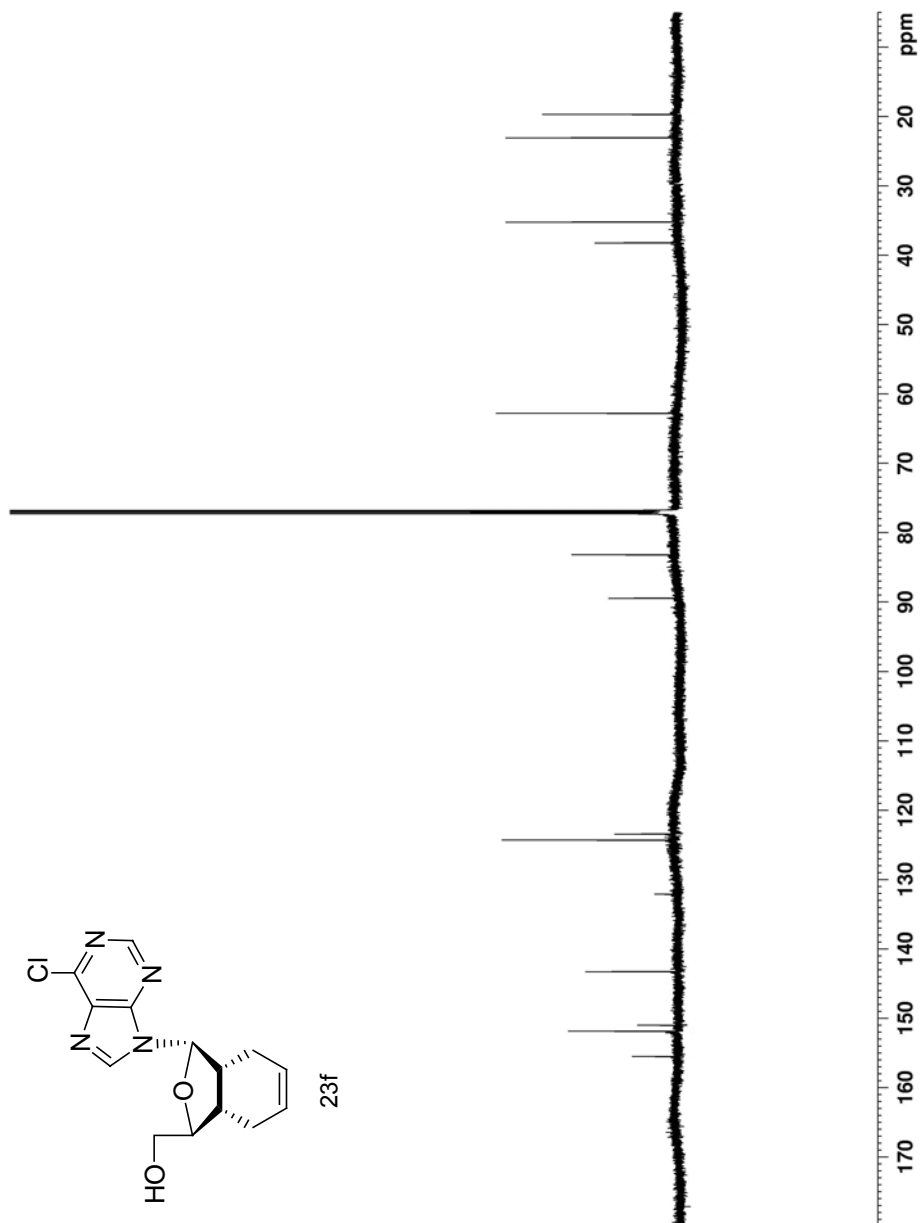

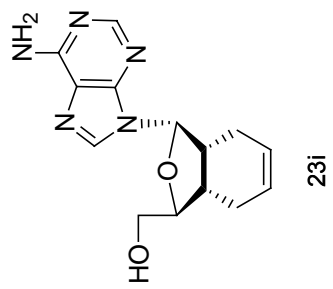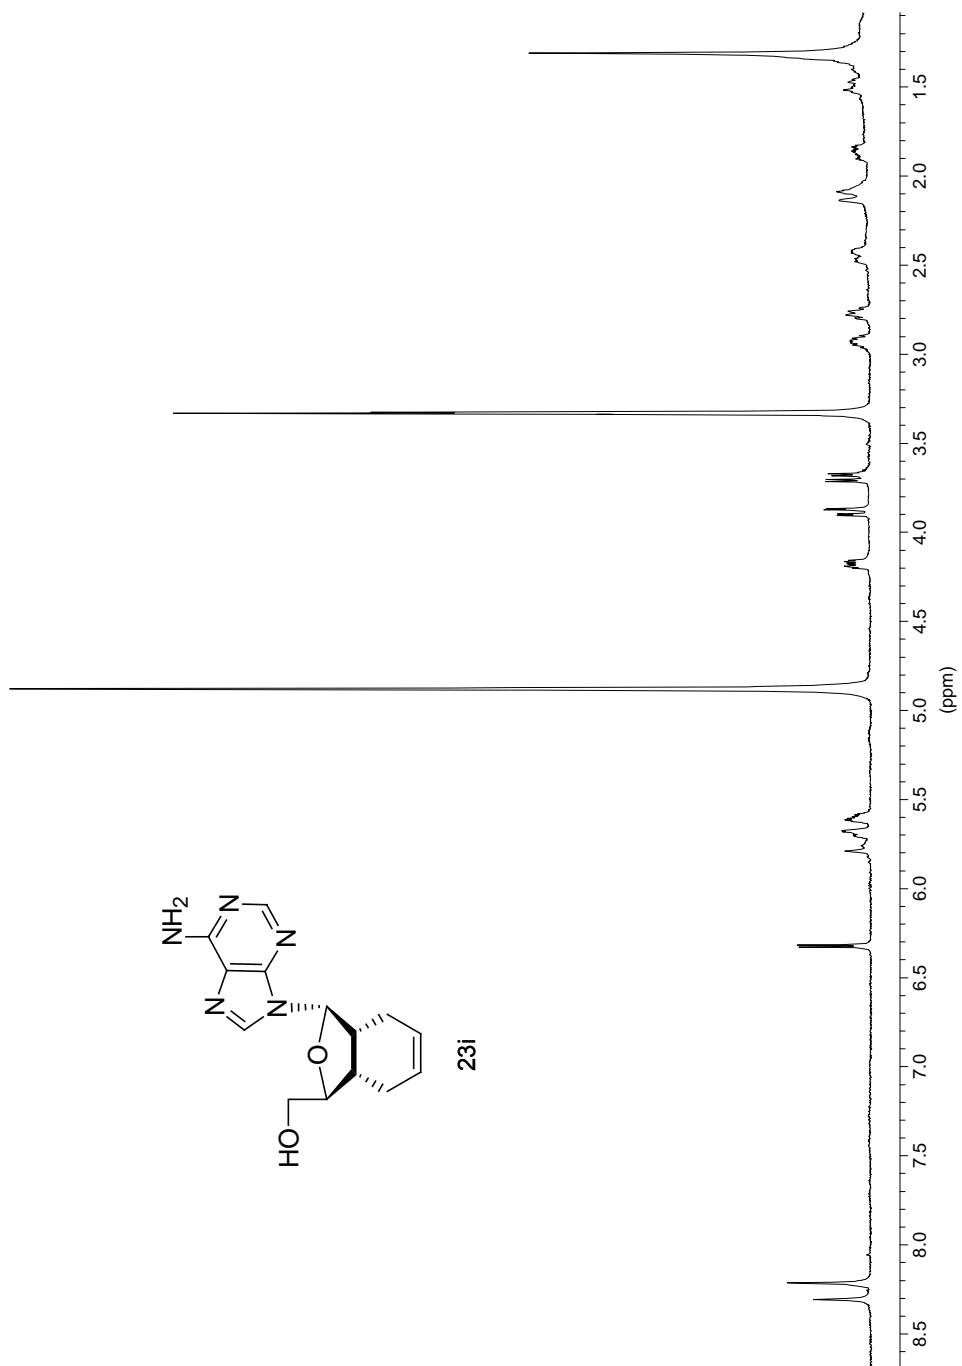

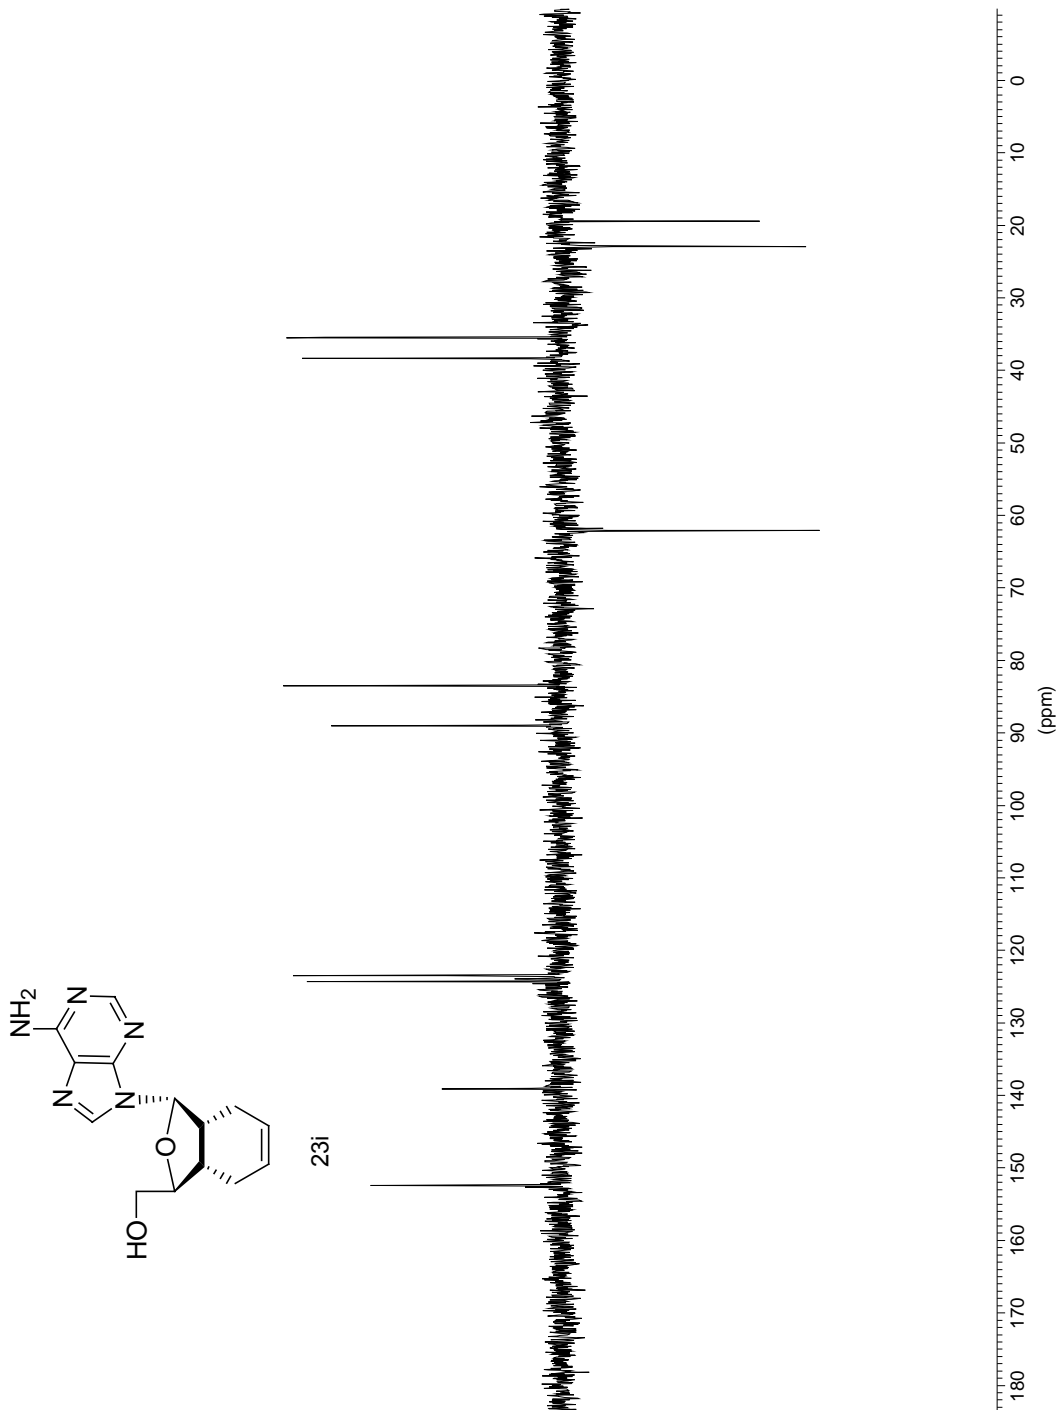

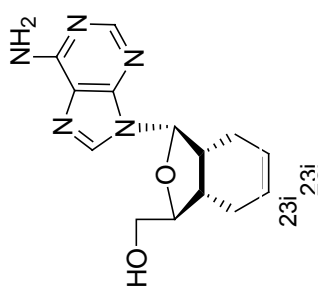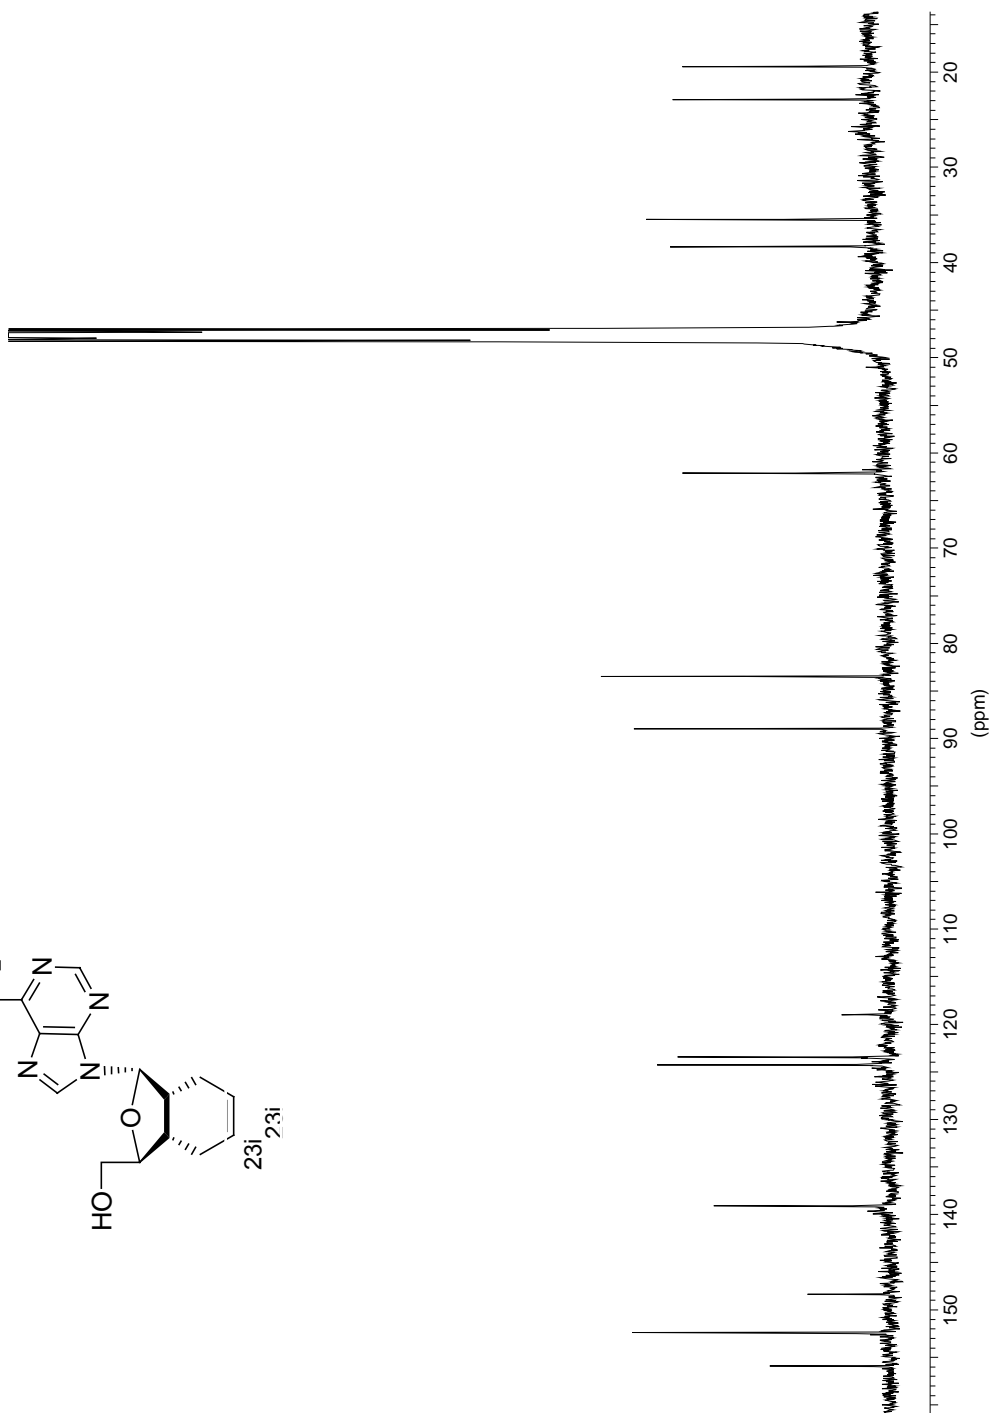

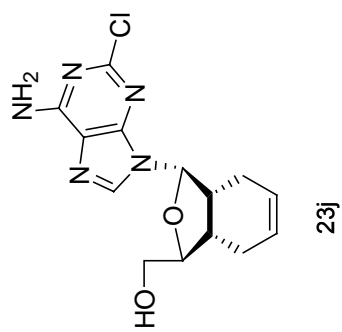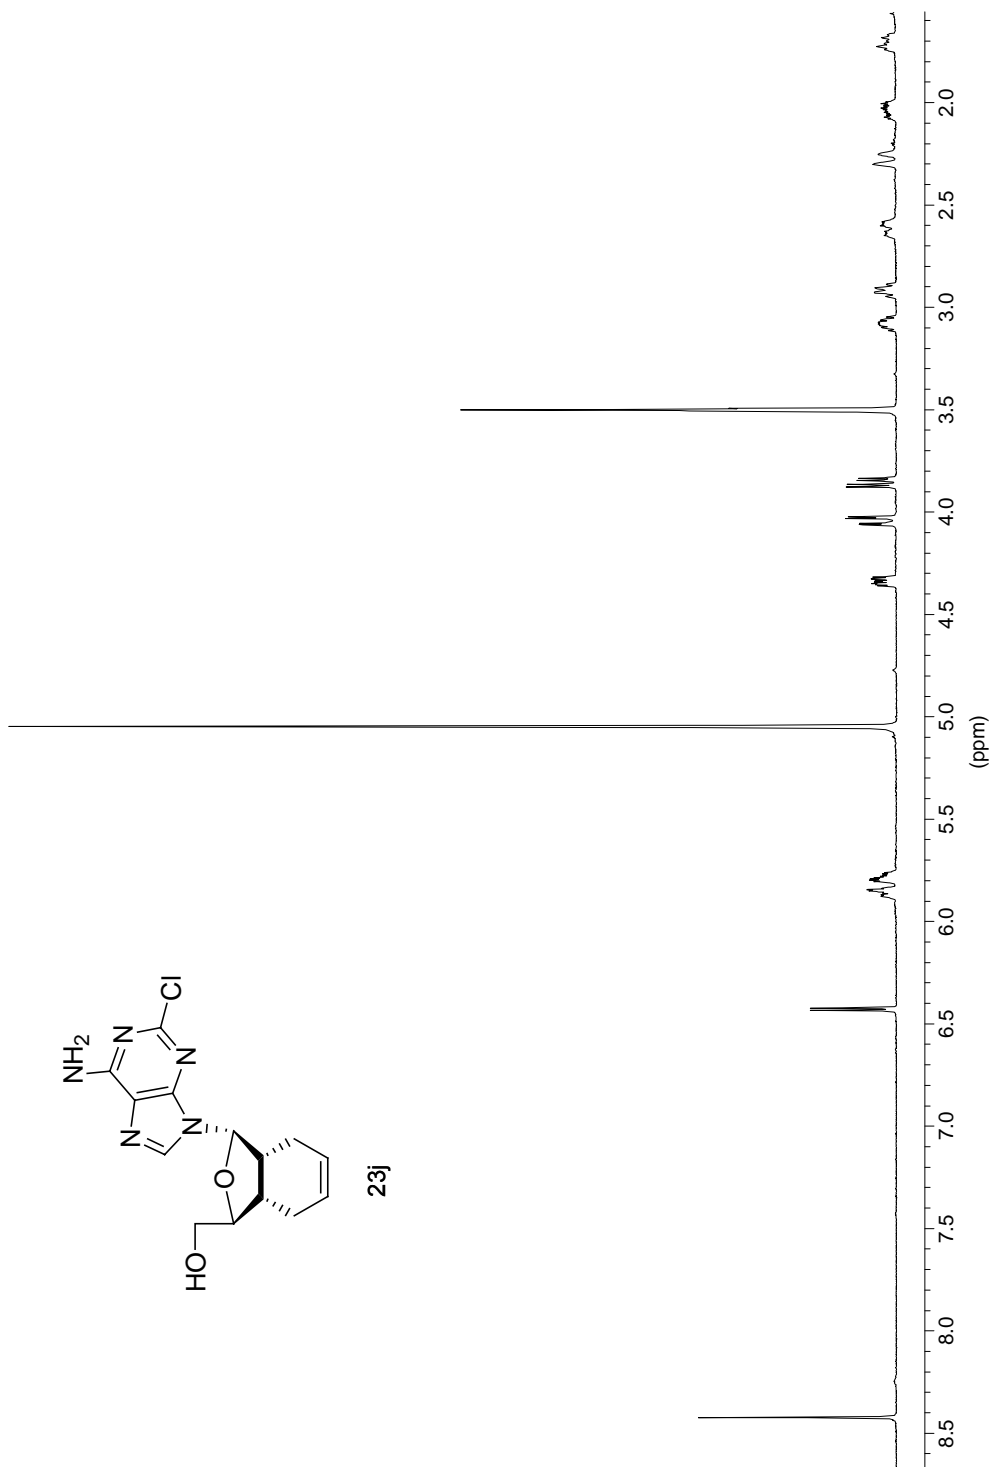



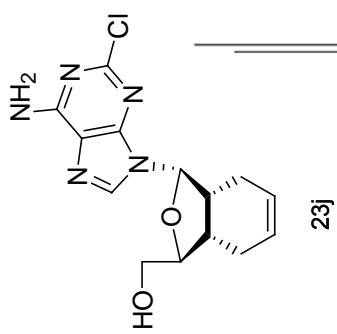

S113

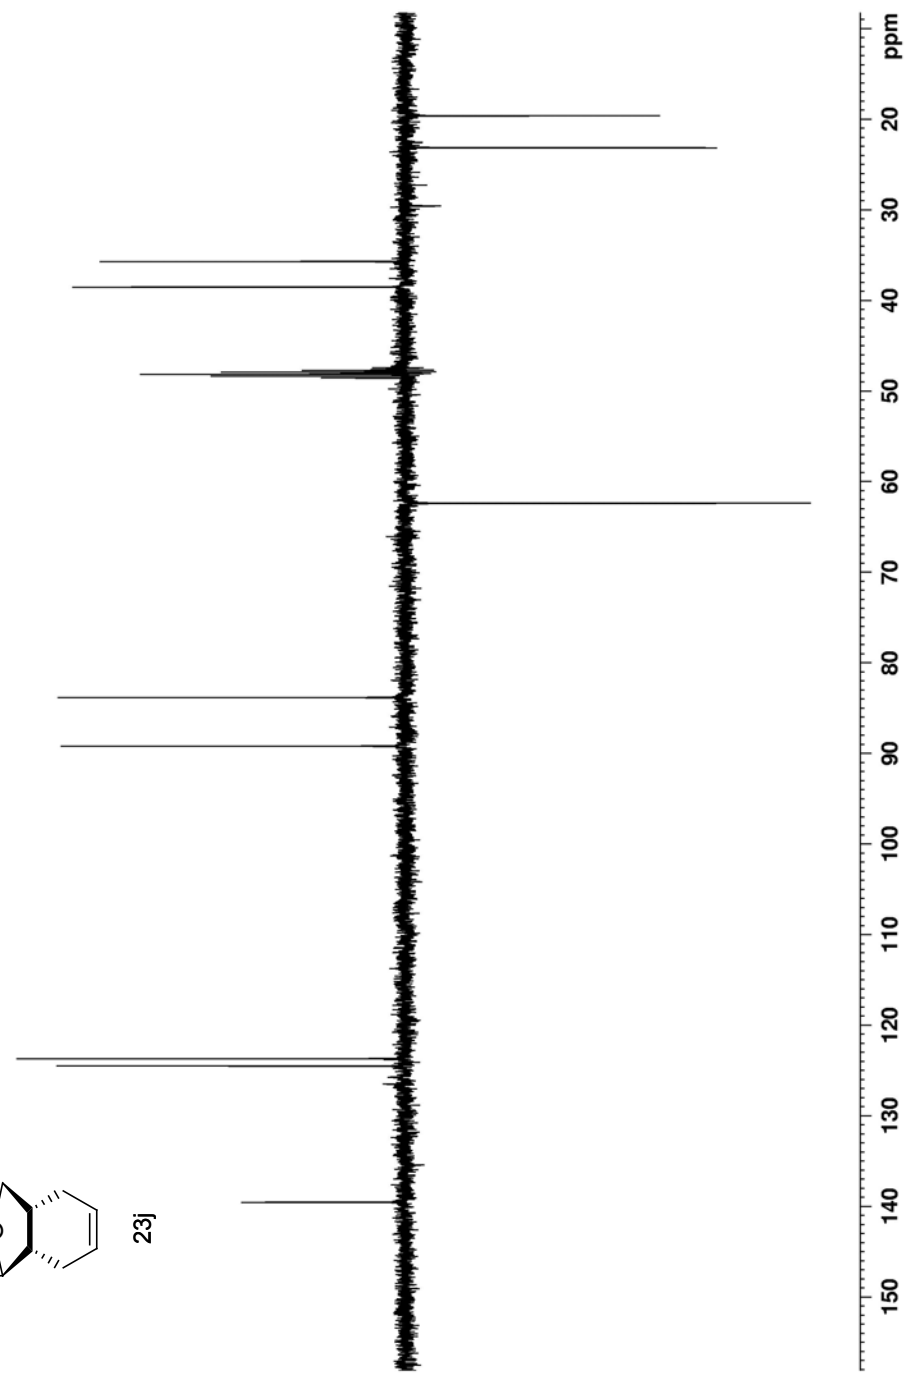

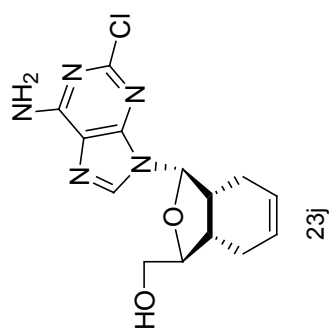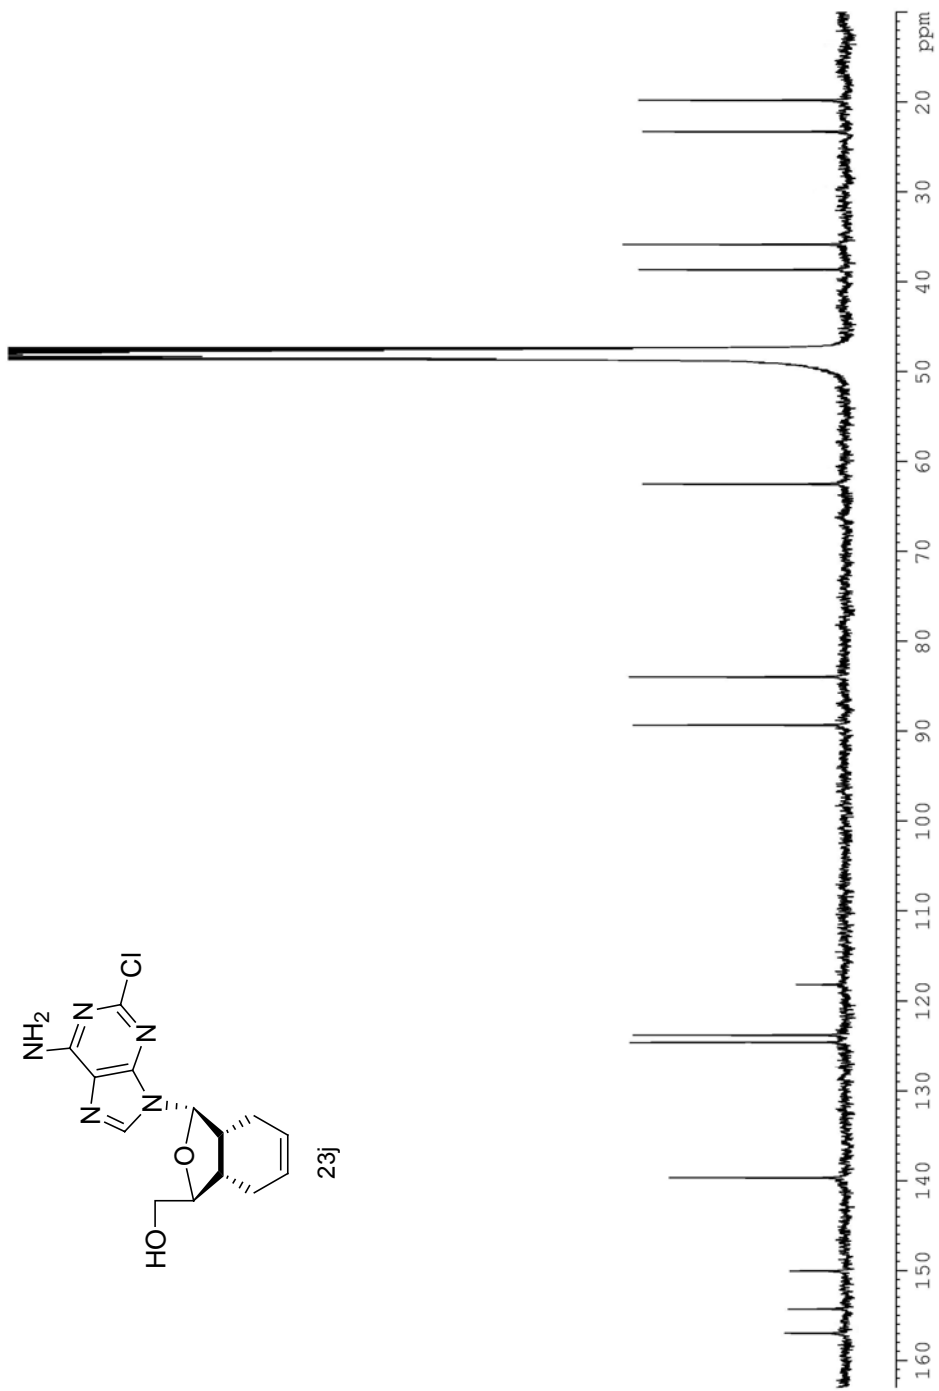

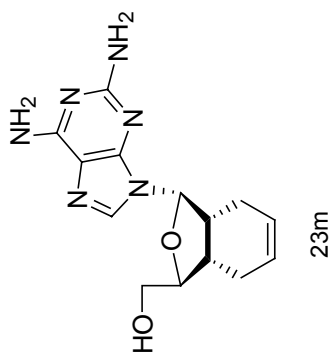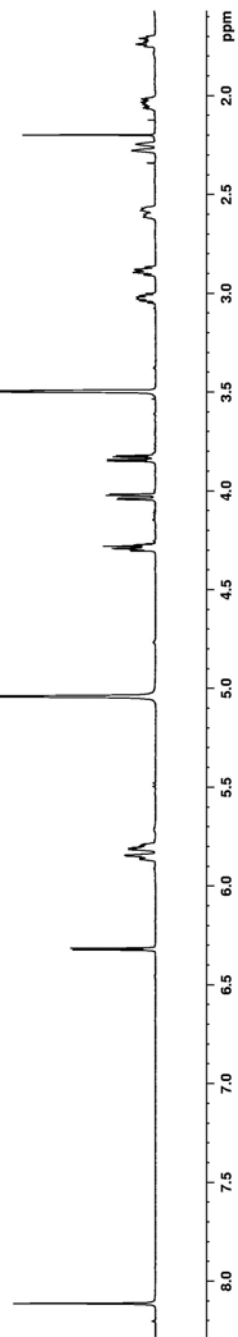

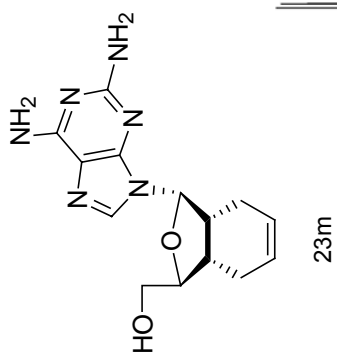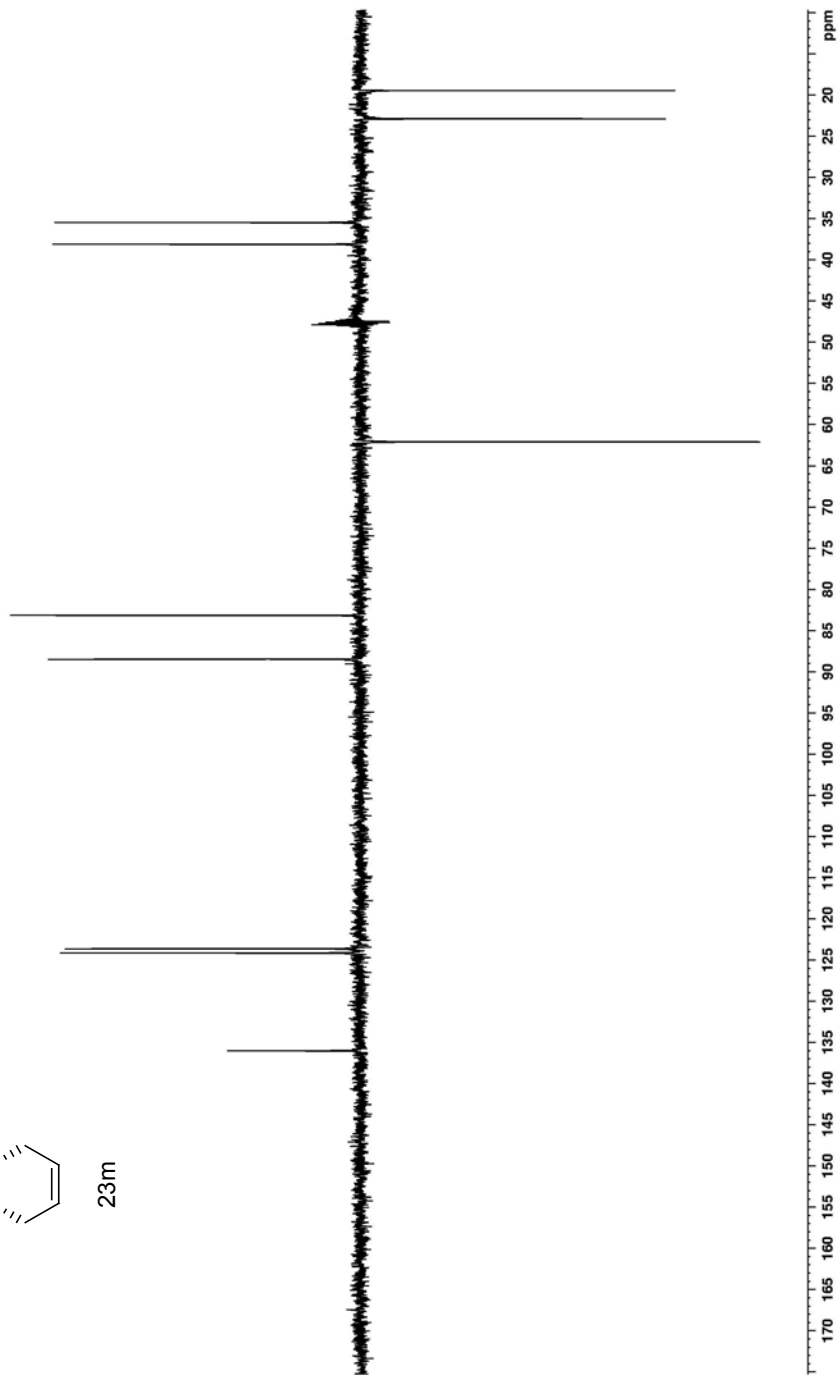

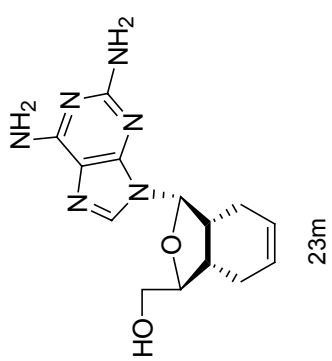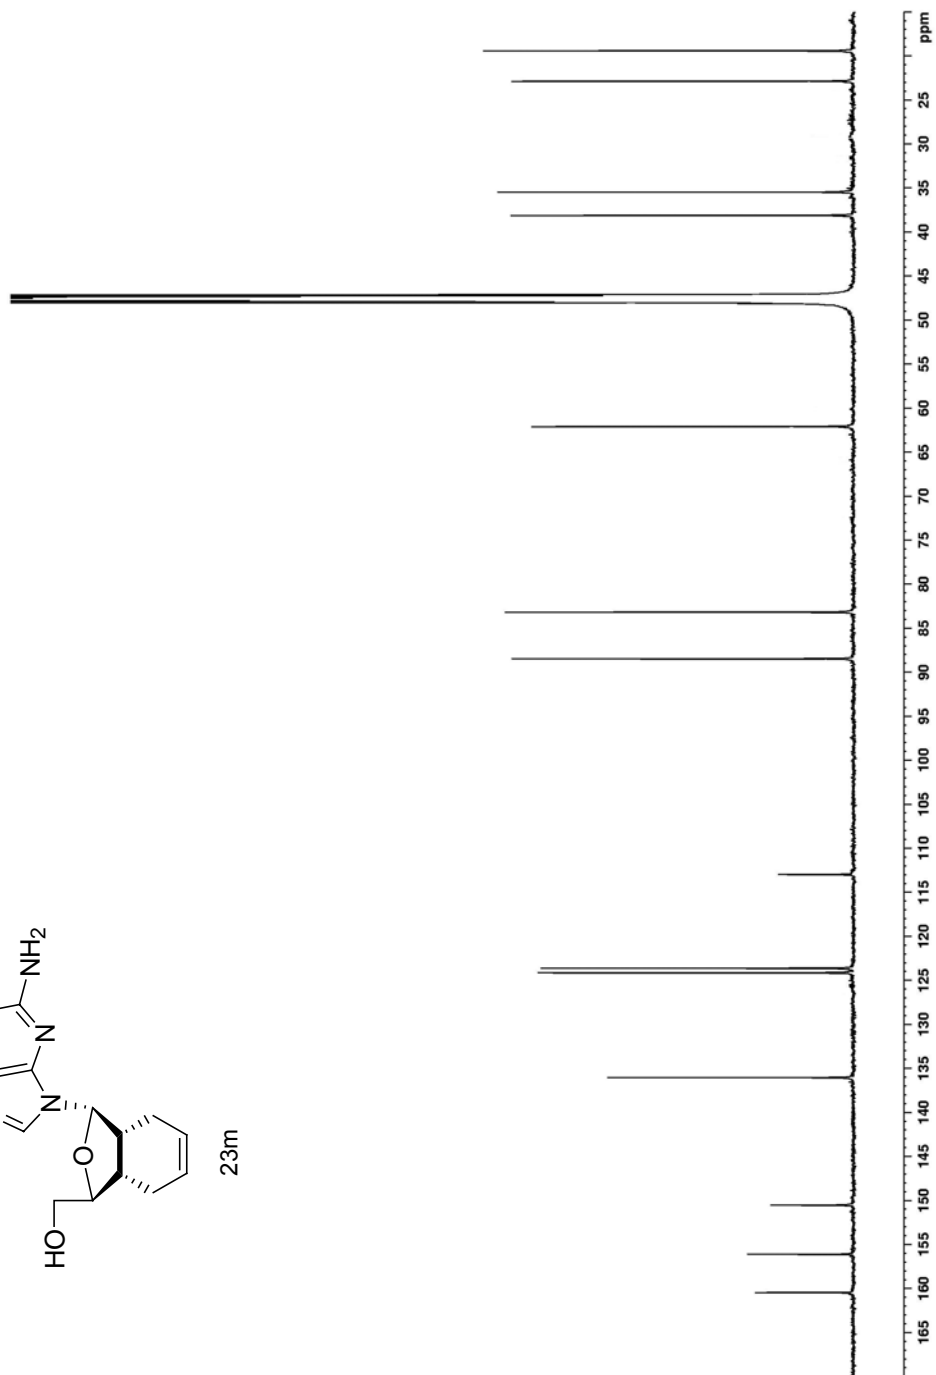

COSY

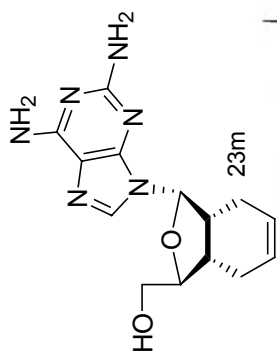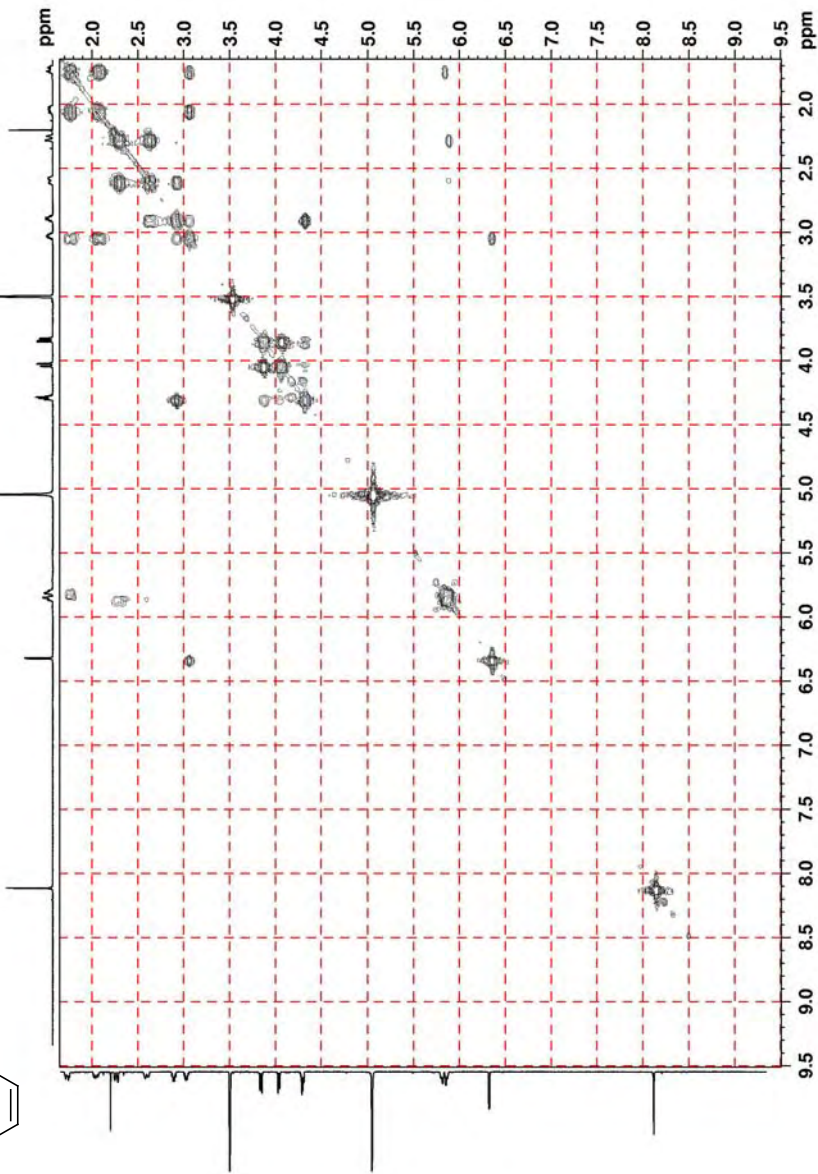

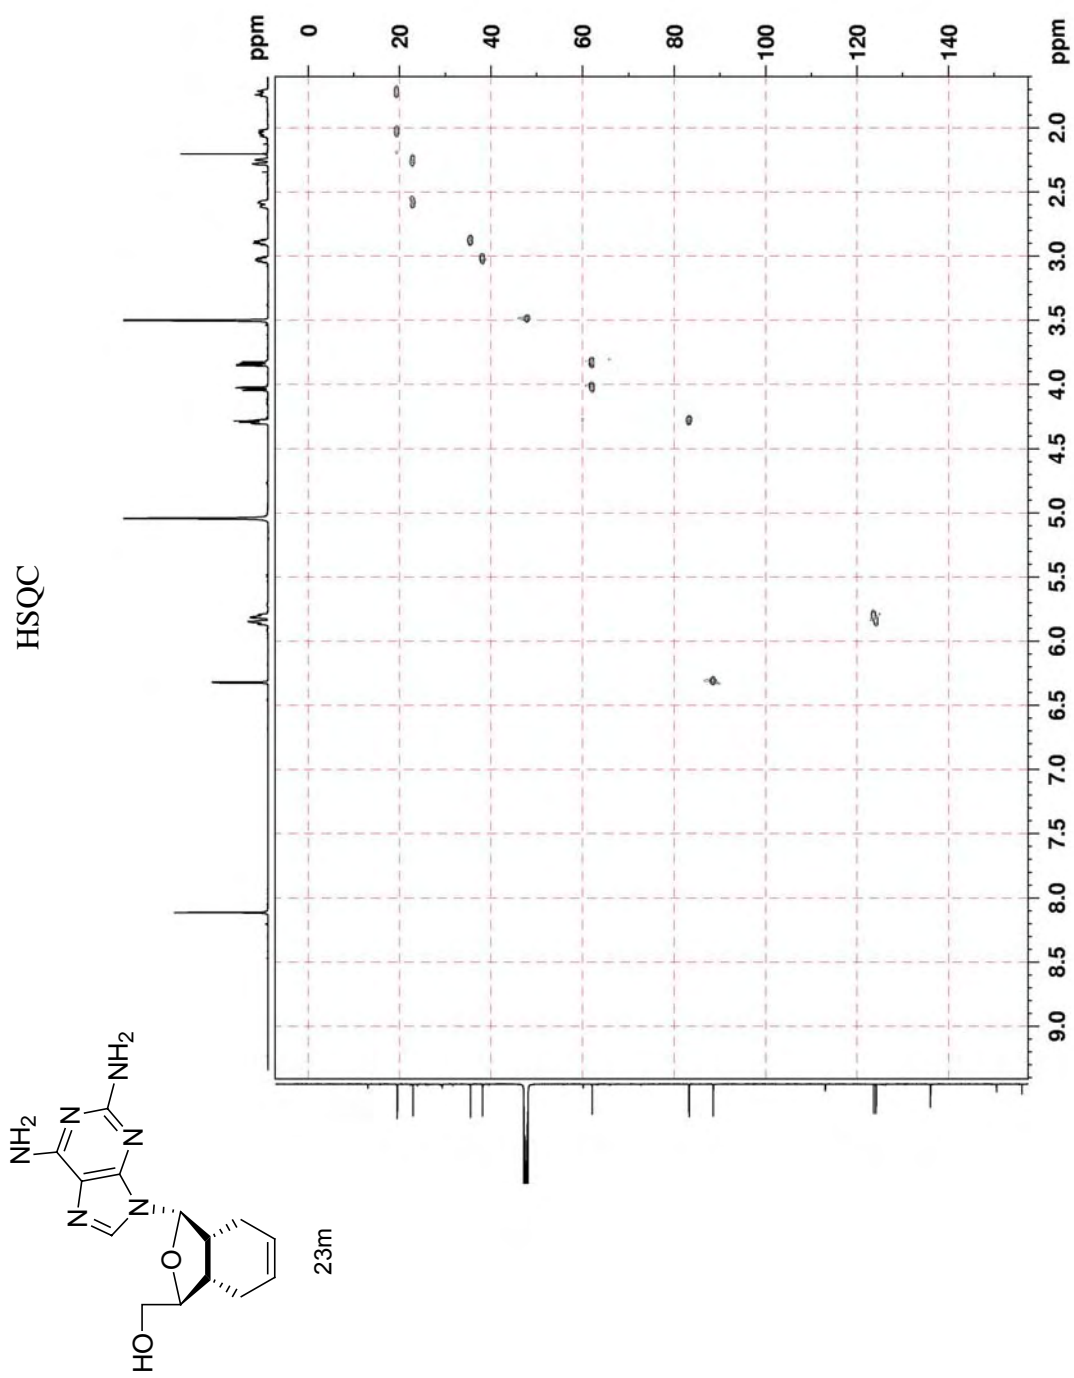

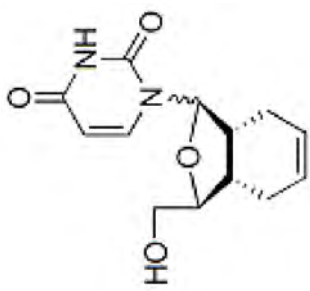

24a

S120

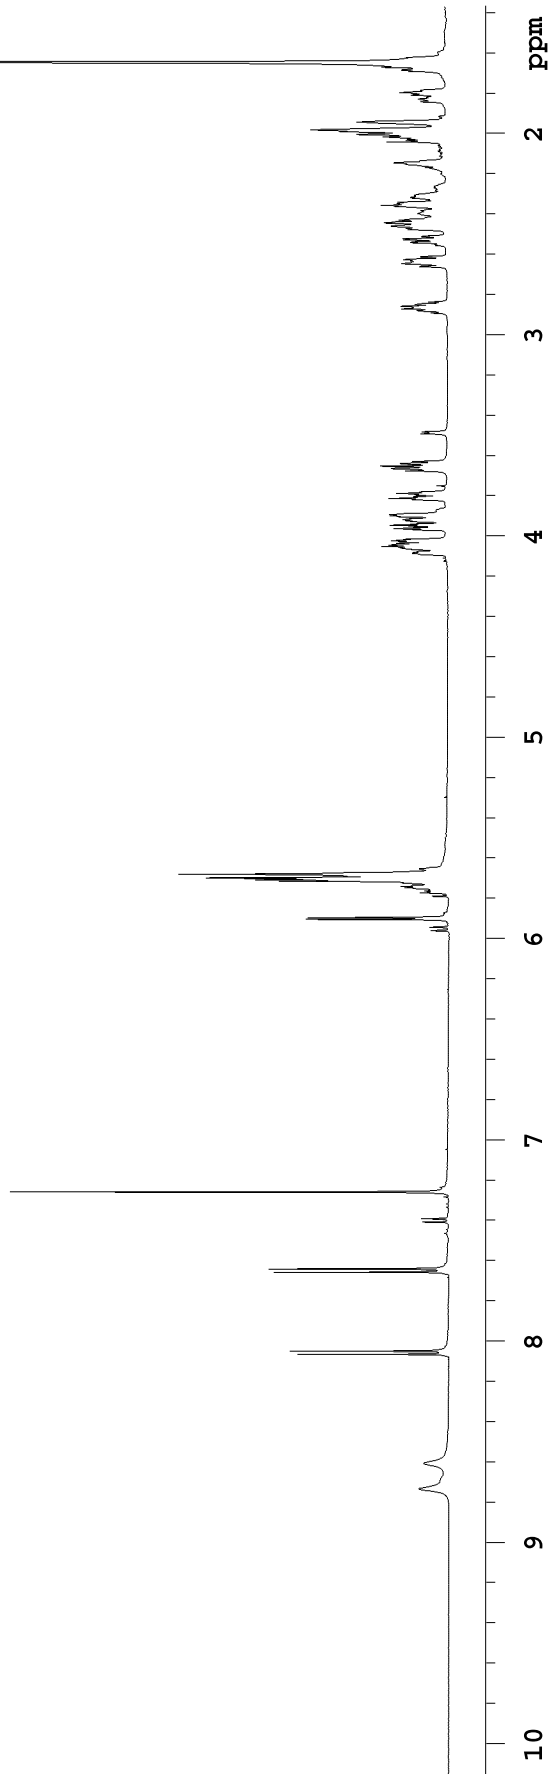



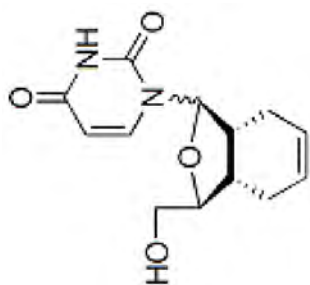

24a

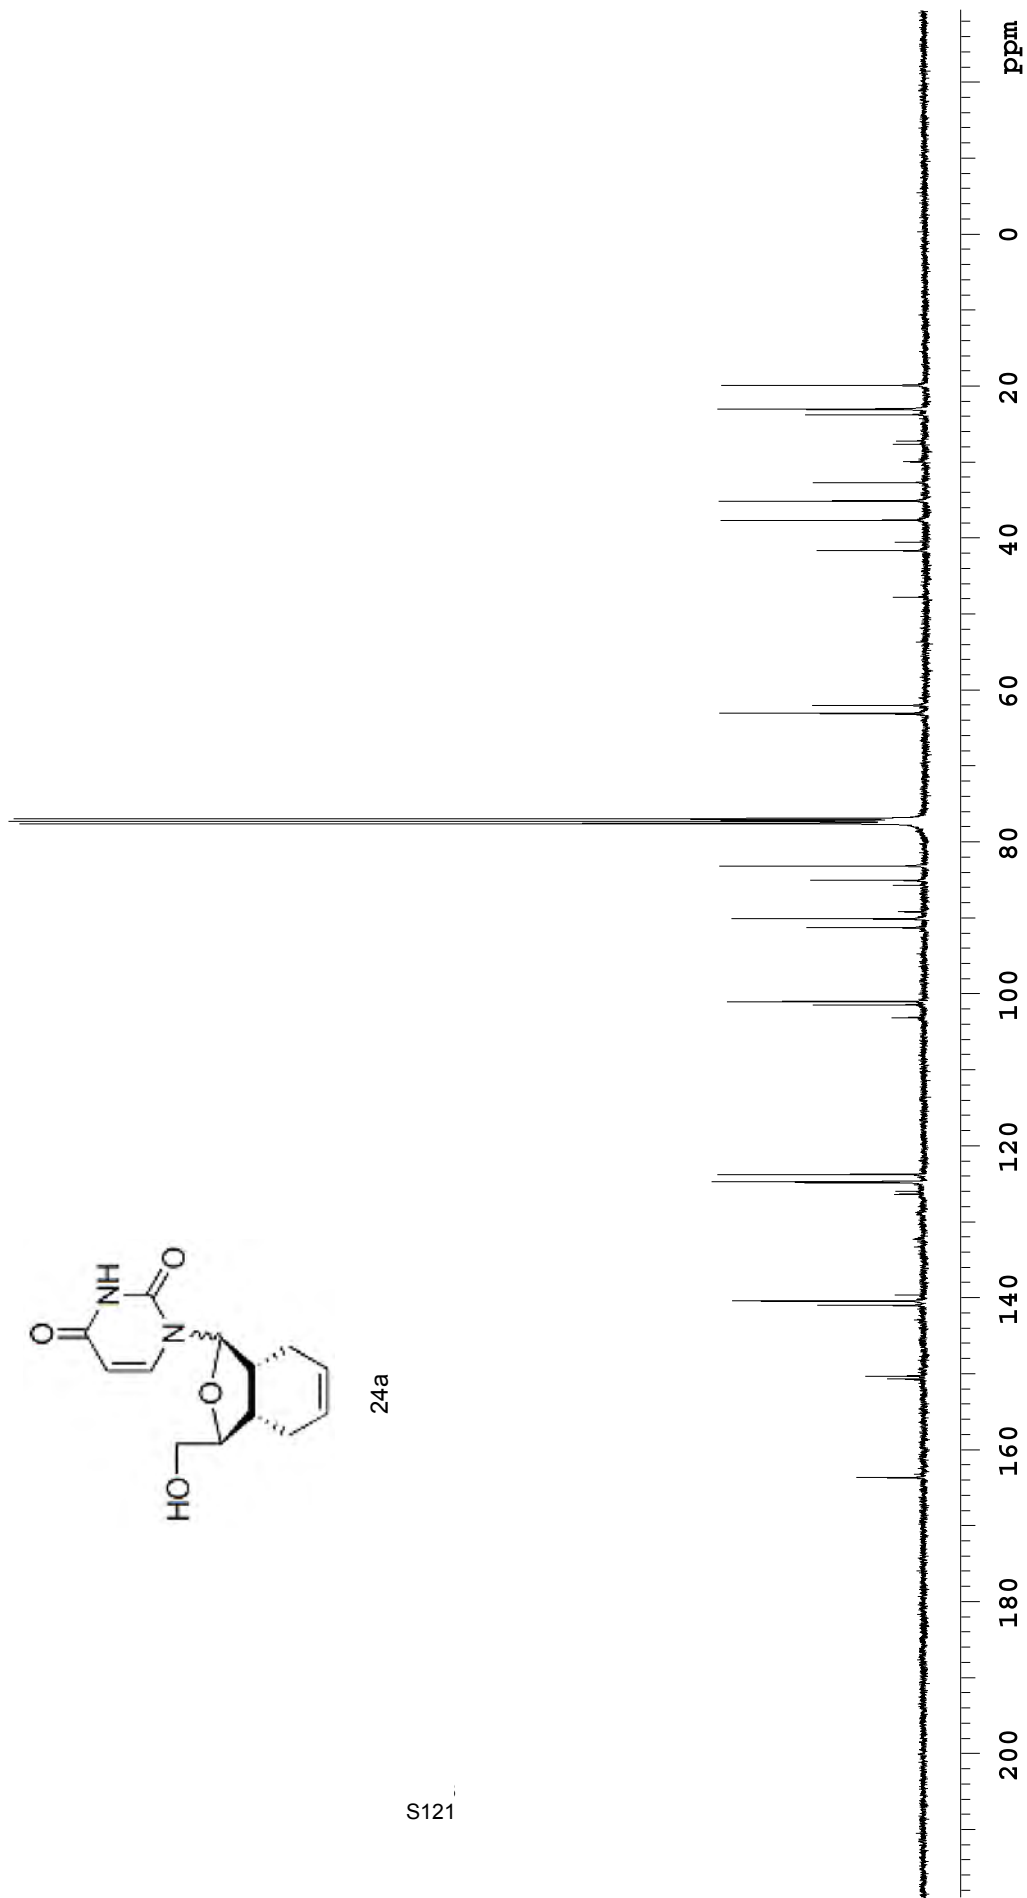

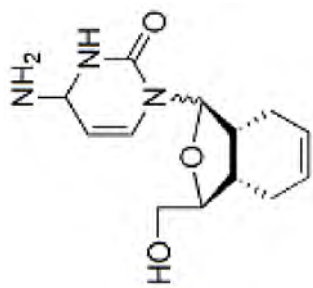

24h

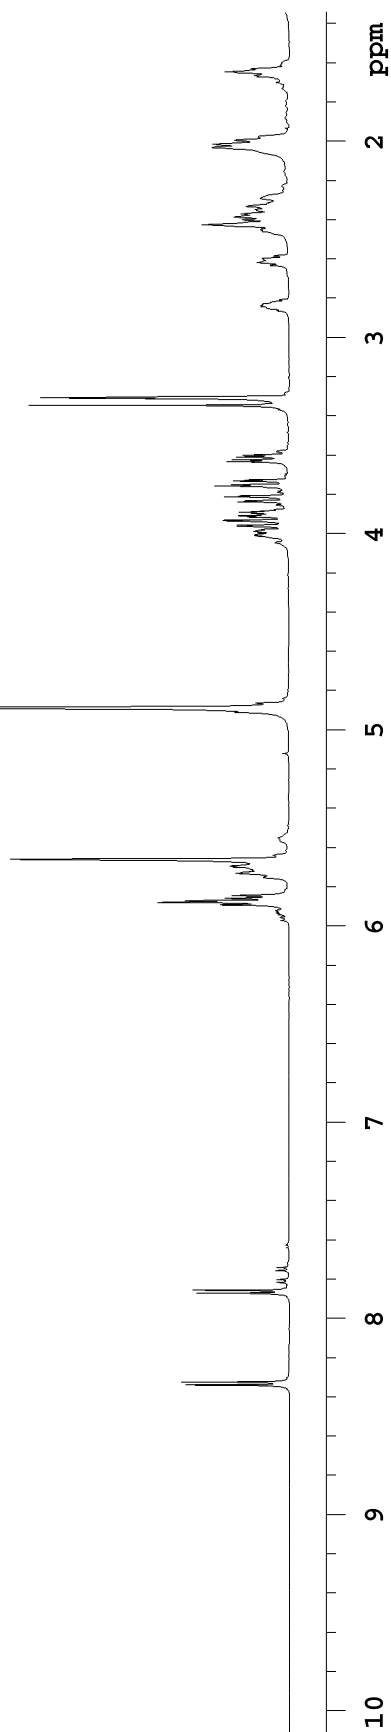

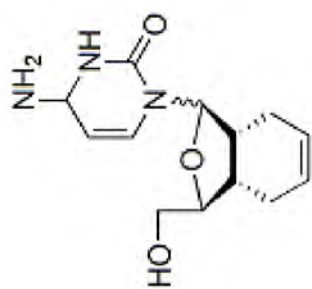

24h

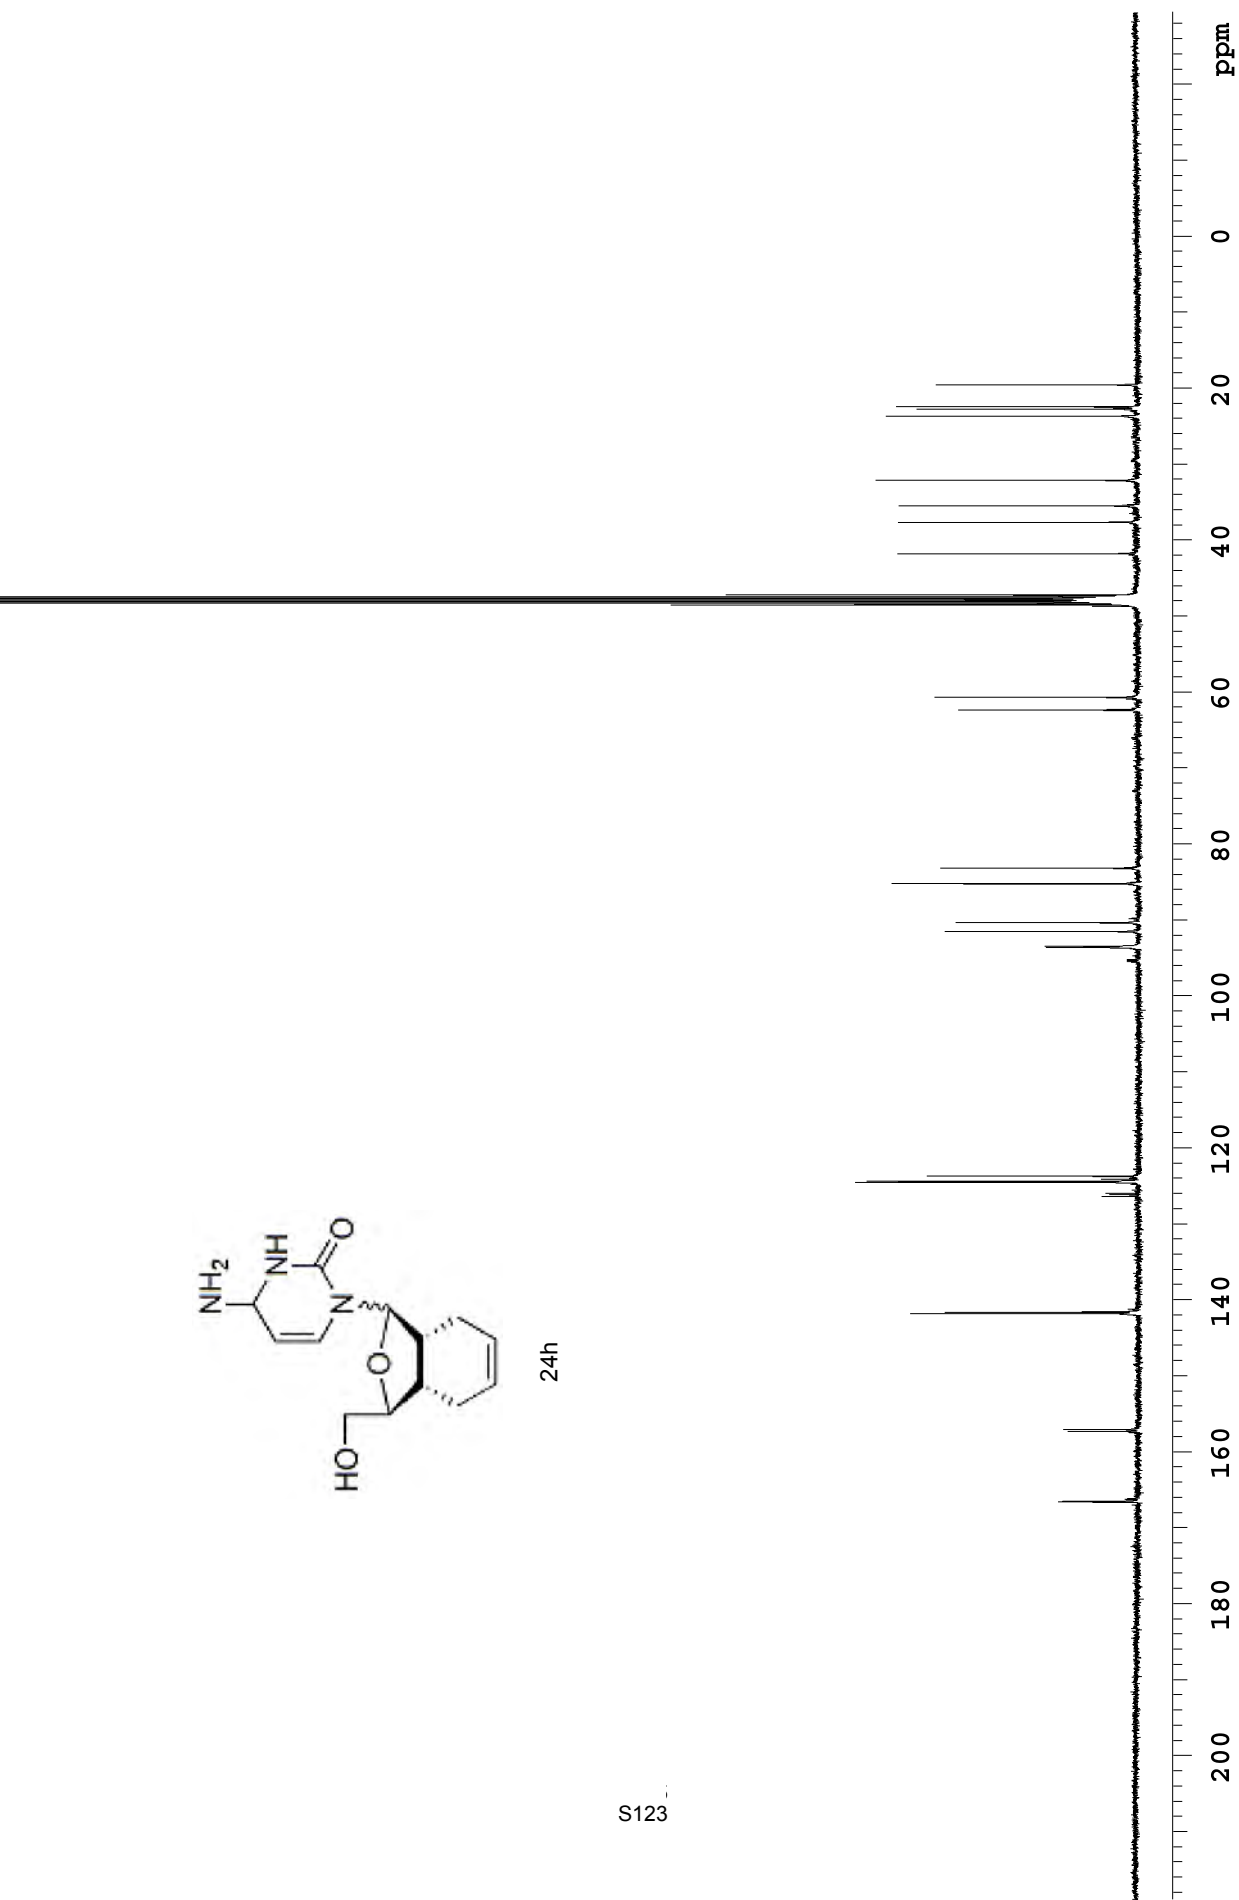

Supplement: NIHMS1651947-supplement-suppl_data.pdf [file NIHMS1651947-supplement-suppl_data.pdf]
